# Supplementary material for: CO-enabled rhenium hydride catalyst for directed C(sp2)–H bond alkylation with olefins
Source: Royal Society of Chemistry journal article supplement (doi:10.1039/c4qo00329b), 2015-01-01
Supplement: c4qo00329b1.pdf [file c4qo00329b1.pdf]

## Electronic Supplementary Information

### CO-Enabled Rhenium Hydride Catalyst for Directed C(sp<sup>2</sup>)-H bond Alkylation with Olefins

Hongming Jin,<sup>a</sup> Zhengbo Zhu,<sup>a</sup> Ning Jin,<sup>a</sup> Jin Xie,<sup>a</sup> Yixiang Cheng<sup>a</sup> and Chengjian Zhu<sup>\*a,b</sup>

<sup>a</sup> State Key Laboratory of Coordination Chemistry, School of Chemistry and Chemical Engineering, Nanjing University, Nanjing 210093, P. R. China. E-mail: cjzhu@nju.edu.cn

<sup>b</sup> State Key Laboratory of Organometallic Chemistry, Shanghai Institute of Organic Chemistry, Shanghai 200032, P. R. China.

#### Contents:

|                                                                                                                   |    |
|-------------------------------------------------------------------------------------------------------------------|----|
| General Information .....                                                                                         | 2  |
| Materials .....                                                                                                   | 2  |
| Synthesis of heptahydridobis(triphenylphosphine)rhenium, ReH <sub>7</sub> (PPh <sub>3</sub> ) <sub>2</sub> .....  | 2  |
| General procedure for the CO-enabled rhenium hydride compound-catalyzed C(sp <sup>2</sup> )-H alkylation.....     | 2  |
| General procedure for the rhenium-catalyzed intramolecular reaction for construction of indolone frameworks ..... | 2  |
| Deuterium labeling studies.....                                                                                   | 2  |
| Characterization data of compounds .....                                                                          | 4  |
| Copies <sup>1</sup> H NMR, <sup>13</sup> C NMR .....                                                              | 14 |
| Reference.....                                                                                                    | 57 |

## General Information

All reactions were carried out under CO atmosphere unless otherwise noted. All reagents and solvents were obtained from commercial suppliers and used without further purification. Reactions were monitored by TLC on silica gel plates (GF254).  $^1\text{H}$  NMR and  $^{13}\text{C}$  NMR spectra were recorded on 400 MHz spectrometer, with chemical shifts ( $\delta$ ) referenced to the residual solvent signal ( $^1\text{H}$  and  $^{13}\text{C}$ ). Chemical shifts ( $\delta$ ) are reported in ppm downfield from tetramethylsilane. Abbreviations for signal couplings are: s, singlet; d, doublet; t, triplet; m, multiplet.

## Materials

All solvents were used without further purification.  $\text{ReOCl}_3(\text{PPh}_3)_2$ <sup>[1]</sup> and reagents **1**<sup>[2, 3]</sup>, **4**<sup>[4-6]</sup> have been prepared from according literature.  $\text{KReO}_4$  was purchased from ZHUZHOUKAITE Industrial Corporation. Ltd.

## Synthesis of heptahydridobis(triphenylphosphine)rhenium, $\text{ReH}_7(\text{PPh}_3)_2$

$\text{ReOCl}_3(\text{PPh}_3)_2$  (2.4 mmol, 2.0 g) was added to 30 mL dry THF and the mixture was stirred under  $\text{N}_2$  atmosphere.  $\text{LiAlH}_4$  (19 mmol, 0.71 g) was carefully added at 0 °C. After the reaction finished, the solvent was removed on a vacuum line. The residue was washed twice with absolute water (15x2 mL), twice with EtOH (15x2 mL), and twice times with  $\text{Et}_2\text{O}$  (10x2 mL). The dry residue was extracted three times with THF (10x3 mL). The volume of THF was reduced to 5 mL.  $\text{Et}_2\text{O}$  (10 mL), and hexane (10 mL) were added to induced precipitation. The beige microcrystalline  $\text{ReH}_7(\text{PPh}_3)_2$  was corrected by filtering and dried under vacuum. Yield 0.94g (55 %).

$\text{ReD}_7(\text{PPh}_3)_2$  was prepared by the similar procedure, just using  $\text{LiAlD}_4$  instead of  $\text{LiAlH}_4$ .

## General procedure for the CO-enabled rhenium hydride compound-catalyzed $\text{C}(\text{sp}^2)$ -H alkylation

General procedure for the rhenium hydride compound-catalyzed  $\text{sp}^2$  C-H alkylation: the mixture of arenes **1** (0.2 mmol), unsaturated compounds **2** (0.6 mmol),  $\text{ReH}_7(\text{PPh}_3)_2$  (10 mol%, 14 mg) and toluene (0.5 mL) were added into the flask. The 10 mL sealed tube was evacuated and backfilled with CO (approximate 1.5 atm). The reaction mixture was vigorously stirred at 150 °C for 20-24 h. After the reaction finished, the reaction mixture was cooled to room temperature, and the residue was purified by flash column chromatography on silica gel or preparative TLC on GF254 to afford the desired products **3**.

## General procedure for the rhenium-catalyzed intramolecular reaction for construction of indolone frameworks

In a 20 mL sealed tube, the substrates **4** (0.2 mmol),  $\text{ReH}_7(\text{PPh}_3)_2$  (10 mol%, 14 mg) and toluene (0.5 mL) were placed under CO atmosphere (approximate 1.5 atm). The mixture was stirred at 150 °C for 20-24 h. After the reaction finished, the reaction mixture was cooled to room temperature and purified by preparative TLC on GF254 to afford the desired products **5**.

## Deuterium labeling studies.

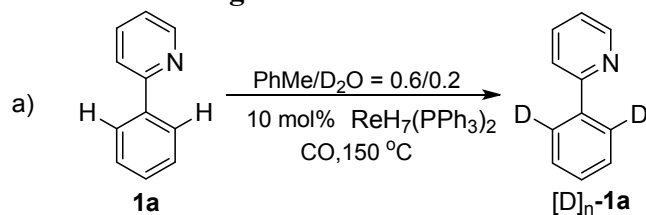

To the 3:1 mixture of PhMe and  $\text{D}_2\text{O}$  add **1a** (0.2 mmol), and were heated under standard condition for 20h. The reaction mixture was cooled to room temperature and purified by preparative TLC on GF254 to afford  $[\text{D}]_n\text{-1a}$ , which was characterized by  $^1\text{H}$  NMR (400 MHz,  $\text{CDCl}_3$ ).

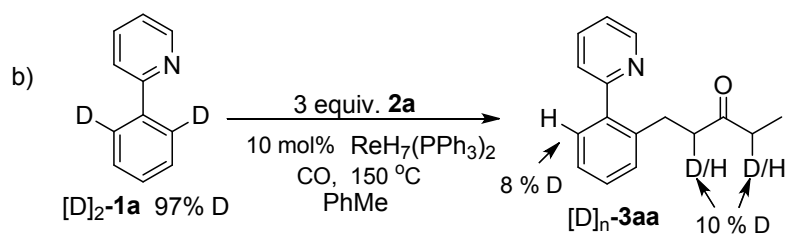

The mixture of  $[D]_2-1a$  (0.2 mmol) and  $2a$  (0.6 mmol) were heated under standard condition for 24h. The reaction mixture was cooled to room temperature and purified by preparative TLC on GF254 to afford  $[D]_n-3aa$ , which was characterized by  $^1\text{H}$  NMR (400 MHz,  $\text{CDCl}_3$ ).

### A large negative kinetic isotope effect

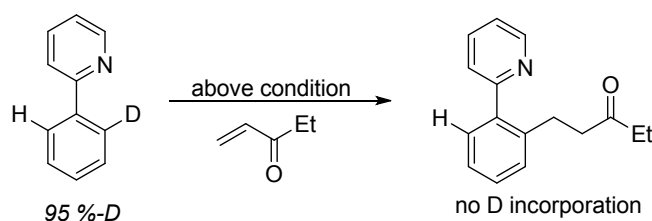

Above procedure was followed. An intramolecular competition reaction was carried out. There is no D incorporation in the product. It reveals that the deuterated species reacts faster than the undeuterated analogue where the rate constants  $k_D \gg k_H$ . It also suggests the step of C-H activation is reversible.

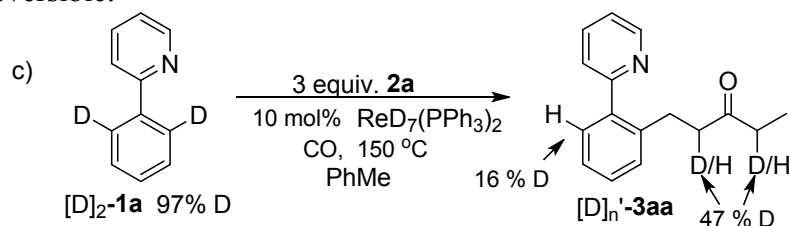

Above procedure was followed, using  $\text{ReD}_7(\text{PPh}_3)_2$  instead of  $\text{ReH}_7(\text{PPh}_3)_2$ .

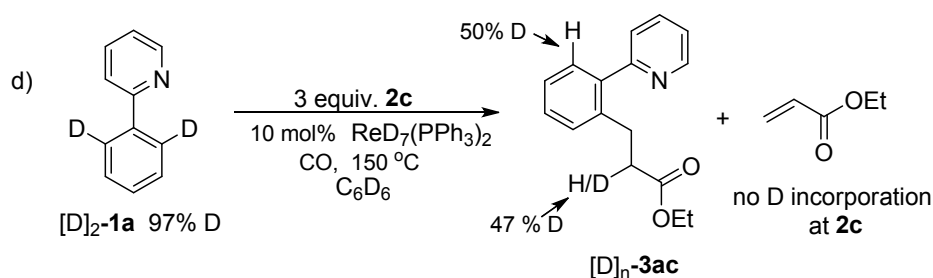

The mixture of  $[D]_2-1a$  (0.2 mmol) and  $2a$  (0.6 mmol) were heated in  $\text{C}_6\text{D}_6$  under standard condition for 24h. Then, the reaction mixture was directly characterized by  $^1\text{H}$  NMR (400 MHz,  $\text{C}_6\text{D}_6$ ). Following, the  $[D]_n-3ac$  was separated and characterized by  $^1\text{H}$  NMR (400 MHz,  $d_6$ -acetone).

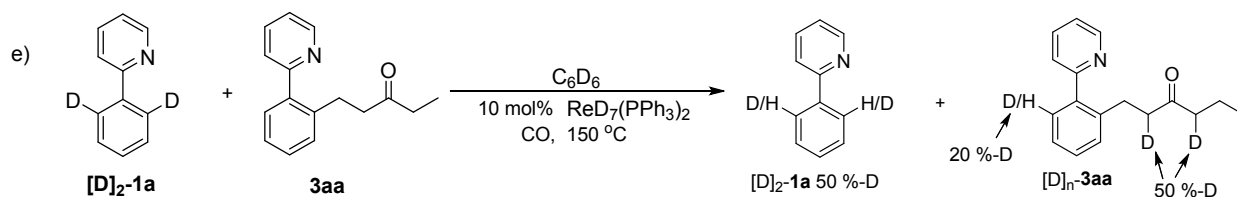

The mixture of  $[D]_2-1a$  (0.2 mmol) and  $3aa$  (0.1 mmol) were heated in  $\text{C}_6\text{D}_6$  under standard condition for 24h. The reaction mixture was cooled to room temperature and purified by preparative TLC on GF254 to afford  $[D]_n-3aa$ , which was characterized by  $^1\text{H}$  NMR (400 MHz,  $\text{CDCl}_3$ ).

## Characterization data of compounds

### Heptahydridobis(triphenylphosphine)rhenium<sup>[7]</sup>

ReH<sub>7</sub>(PPh<sub>3</sub>)<sub>2</sub>

Yield 55%, grey solid. <sup>1</sup>H NMR (400 MHz, C<sub>6</sub>D<sub>6</sub>): δ = 7.87-7.80 (m, 12H), 7.02-6.92 (m, 18H), -4.19 (t, *J* = 18.0 Hz, 7H) ppm.

### 1-(2-(pyridin-2-yl)phenyl)pentan-3-one, 3aa

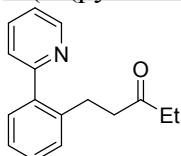

Yield 92 %, colorless oil; <sup>1</sup>H NMR (400 MHz, CDCl<sub>3</sub>) δ = 8.71-8.66 (m, 1 H), 7.82-7.76 (m, 1 H), 7.44-7.40 (m, 1 H), 7.37-7.27 (m, 5 H), 2.95 (t, *J* = 8.0 Hz, 2 H), 2.66 (t, *J* = 8.0 Hz, 2 H), 2.32 (q, *J* = 7.2 Hz, 2 H), 0.98 (t, *J* = 7.2 Hz, 3 H) ppm; <sup>13</sup>C NMR (100 MHz, CDCl<sub>3</sub>) δ = 211.0, 159.7, 148.8, 139.9, 139.2, 136.8, 129.9, 129.8, 128.7, 126.3, 124.2, 122.0, 43.9, 35.8, 27.5, 7.80 ppm. HRMS (ESI) *m/z* calcd for C<sub>16</sub>H<sub>17</sub>NO [M+H]<sup>+</sup> 240.1383; found: 240.1385.

### 1-(5-methoxy-2-(pyridin-2-yl)phenyl)pentan-3-one, 3ba

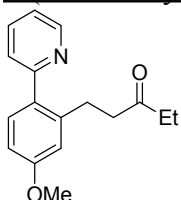

Yield 93 %, colorless oil; <sup>1</sup>H NMR (400 MHz, CDCl<sub>3</sub>) δ = 8.66-8.61 (m, 1 H), 7.75-7.69 (m, 1 H), 7.39-7.19 (m, 3 H), 6.85-6.79 (m, 2 H), 3.82 (s, 3 H), 2.97 (t, *J* = 7.2 Hz, 2 H), 2.67 (t, *J* = 7.6 Hz, 2 H), 2.32 (q, *J* = 7.6 Hz, 2 H), 0.99 (t, *J* = 7.6 Hz, 3 H) ppm; <sup>13</sup>C NMR (100 MHz, CDCl<sub>3</sub>) δ = 211.0, 159.7, 159.6, 148.9, 140.9, 136.4, 133.0, 131.2, 124.0, 121.5, 115.3, 111.6, 55.3, 43.9, 35.8, 27.9, 7.80 ppm. HRMS (ESI) *m/z* calcd for C<sub>17</sub>H<sub>19</sub>NO<sub>2</sub> [M+H]<sup>+</sup> 270.1489; found: 270.1490.

### 1-(4-(pyridin-2-yl)-[1,1'-biphenyl]-3-yl)pentan-3-one, 3ca

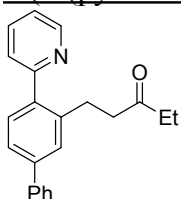

Yield 96 %, colorless oil; <sup>1</sup>H NMR (400 MHz, CDCl<sub>3</sub>) δ = 8.71-8.67 (m, 1 H), 7.83-7.76 (m, 1 H), 7.65-7.60 (m, 2 H), 7.55-7.50 (m, 2 H), 7.49-7.41 (m, 3H), 7.40-7.32 (m, 1H), 7.32-7.26 (m, 1H), 3.04 (t, *J* = 7.6 Hz, 2 H), 2.72 (t, *J* = 7.6 Hz, 2 H), 2.33 (q, *J* = 7.2 Hz, 2 H), 0.99 (t, *J* = 7.2 Hz, 3 H) ppm; <sup>13</sup>C NMR (100 MHz, CDCl<sub>3</sub>) δ = 210.9, 159.4, 148.8, 141.5, 140.6, 139.8, 138.8, 136.8, 130.5, 128.8 (2C), 128.7, 127.5, 127.1 (2C), 125.1, 124.2, 121.9, 55.3, 44.1, 35.9, 27.7, 7.80 ppm. HRMS (ESI) *m/z* calcd for C<sub>22</sub>H<sub>21</sub>NO [M+Na]<sup>+</sup> 338.1515; found: 338.1530.

**1-(5-chloro-2-(pyridin-2-yl)phenyl)pentan-3-one, 3da**

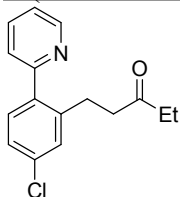

Yield 93 %, colorless oil;  $^1\text{H NMR}$  (400 MHz,  $\text{CDCl}_3$ )  $\delta$  = 8.66-8.61 (m, 1 H), 7.75-7.69 (m, 1 H), 7.39-7.19 (m, 3 H), 6.85-6.79 (m, 2 H), 3.82 (s, 3 H), 2.97 (t,  $J$  = 7.2 Hz, 2 H), 2.67 (t,  $J$  = 7.6 Hz, 2 H), 2.32 (q,  $J$  = 7.6 Hz, 2 H), 0.99 (t,  $J$  = 7.6 Hz, 3 H) ppm;  $^{13}\text{C NMR}$  (100 MHz,  $\text{CDCl}_3$ )  $\delta$  = 211.0, 159.7, 159.6, 148.9, 140.9, 136.4, 133.0, 131.2, 124.0, 121.5, 115.3, 111.6, 55.3, 43.9, 35.8, 27.9, 7.80 ppm. HRMS (ESI)  $m/z$  calcd for  $\text{C}_{16}\text{H}_{16}\text{ClNO}$   $[\text{M}+\text{H}]^+$  274.0993; found: 274.0996.

**1-(3-chloro-2-(pyridin-2-yl)phenyl)pentan-3-one, 3ea**

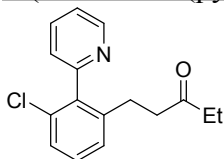

Yield 85 %, colorless oil;  $^1\text{H NMR}$  (400 MHz,  $\text{CDCl}_3$ )  $\delta$  = 8.76-8.71 (m, 1 H), 7.91-7.83 (m, 1 H), 7.42-7.31 (m, 3 H), 7.31-7.25 (m, 1 H), 7.23-7.17 (m, 1 H), 2.79-2.48 (m, 4 H), 2.30 (q,  $J$  = 7.2 Hz, 2 H), 0.96 (t,  $J$  = 7.6 Hz, 3 H) ppm;  $^{13}\text{C NMR}$  (100 MHz,  $\text{CDCl}_3$ )  $\delta$  = 210.3, 156.4, 148.6, 141.8, 138.1, 137.4, 133.3, 129.7, 127.8, 127.4, 125.7, 122.9, 43.2, 35.9, 27.8, 7.7 ppm. HRMS (ESI)  $m/z$  calcd for  $\text{C}_{16}\text{H}_{16}\text{ClNO}$   $[\text{M}+\text{H}]^+$  274.0993; found: 274.0997.

**1-(2-(pyridin-2-yl)-5-(trifluoromethyl)phenyl)pentan-3-one, 3fa**

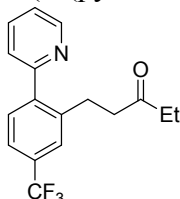

Yield 83 %, colorless oil;  $^1\text{H NMR}$  (400 MHz,  $\text{CDCl}_3$ )  $\delta$  = 8.71-8.66 (m, 1 H), 7.85-7.78 (m, 1 H), 7.57-7.52 (m, 2 H), 7.49-7.40 (m, 2 H), 7.35-7.30 (m, 1H), 3.82 (s, 3 H), 2.99 (t,  $J$  = 7.6 Hz, 2 H), 2.70 (t,  $J$  = 7.6 Hz, 2 H), 2.34 (q,  $J$  = 7.2 Hz, 2 H), 1.00 (t,  $J$  = 7.2 Hz, 3 H) ppm;  $^{13}\text{C NMR}$  (100 MHz,  $\text{CDCl}_3$ )  $\delta$  = 210.3, 158.4, 149.1, 143.5, 140.4, 136.9, 130.6 (q,  $J$  = 33 Hz), 130.4, 126.8 (q,  $J$  = 273 Hz), 126.6 (q,  $J$  = 3.6 Hz), 124.1, 123.1 (q,  $J$  = 3.6 Hz), 122.6, 43.5, 35.9, 27.4, 7.80 ppm. HRMS (ESI)  $m/z$  calcd for  $\text{C}_{17}\text{H}_{16}\text{F}_3\text{NO}$   $[\text{M}+\text{H}]^+$  308.1257; found: 308.1260.

**1-(5-fluoro-2-(pyridin-2-yl)phenyl)pentan-3-one, 3ga**

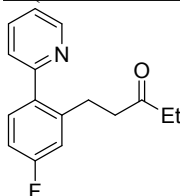

Yield 88 %, colorless oil;  $^1\text{H NMR}$  (400 MHz,  $\text{CDCl}_3$ )  $\delta$  = 8.70-8.63 (m, 1 H), 7.83-7.77 (m, 1 H), 7.43-7.38 (m, 1 H), 7.36-7.26 (m, 2 H), 7.04-6.93 (m, 2 H), 2.94 (t,  $J$  = 7.6 Hz, 2 H), 2.68 (t,  $J$  = 7.2 Hz, 2 H), 2.34 (q,  $J$  = 7.2 Hz, 2 H), 0.99 (t,  $J$  = 7.6 Hz, 3 H) ppm;  $^{13}\text{C NMR}$  (100 MHz,  $\text{CDCl}_3$ )  $\delta$  = 210.5, 162.8 (d,  $J$  = 247.1 Hz), 158.6, 148.7, 142.0 (d,  $J$  = 7.6 Hz), 137.1, 135.8, 131.7 (d,  $J$  = 7.5 Hz), 124.4, 122.2, 116.4 (d,  $J$  = 19.9 Hz), 113.2 (d,  $J$  = 21 Hz), 43.5, 35.9, 27.4, 7.8 ppm. HRMS (ESI)  $m/z$  calcd for  $\text{C}_{16}\text{H}_{16}\text{FNO}$   $[\text{M}+\text{H}]^+$  258.1289; found: 258.1290.

Methyl-3-(3-oxopentyl)-4-(pyridin-2-yl)benzoate, 3ha

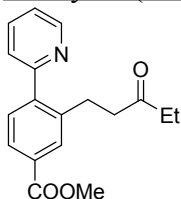

Yield 94 %, colorless oil;  $^1\text{H NMR}$  (400 MHz,  $\text{CDCl}_3$ )  $\delta$  = 8.72-8.67 (m, 1 H), 8.00-7.92 (m, 2 H), 7.85-7.79 (m, 1 H), 7.47-7.40 (m, 2 H), 7.36-7.30 (m, 1H), 3.94 (s, 3H), 2.99 (t,  $J$  = 7.2 Hz, 2 H), 2.71 (t,  $J$  = 7.2 Hz, 2 H), 2.35 (q,  $J$  = 7.2 Hz, 2 H), 1.00 (t,  $J$  = 7.2 Hz, 3 H) ppm;  $^{13}\text{C NMR}$  (100 MHz,  $\text{CDCl}_3$ )  $\delta$  = 210.5, 166.8, 158.7, 148.9, 144.2, 139.7, 137.0, 130.9, 130.2, 130.1, 127.4, 124.2, 122.5, 52.2, 43.6, 35.9, 27.3, 7.8 ppm. HRMS (ESI)  $m/z$  calcd for  $\text{C}_{18}\text{H}_{19}\text{NO}_3$   $[\text{M}+\text{H}]^+$  298.1438; found: 298.1439.

1-(2-(pyridin-2-yl)cyclohex-1-en-1-yl)pentan-3-one, 3ia

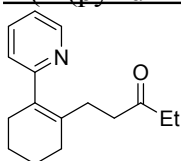

Yield 98 %, colorless oil;  $^1\text{H NMR}$  (400 MHz,  $\text{CDCl}_3$ )  $\delta$  = 8.63-8.50 (m, 1 H), 7.70-7.60 (m, 1 H), 7.21-7.09 (m, 2 H), 2.55-2.43 (m, 2 H), 2.39-2.27 (m, 4 H), 2.25-2.15 (m, 2 H), 2.13-2.04 (m, 2 H), 1.81-1.64 (m, 4 H), 0.98 (t,  $J$  = 7.2 Hz, 3 H) ppm;  $^{13}\text{C NMR}$  (100 MHz,  $\text{CDCl}_3$ )  $\delta$  = 211.4, 161.6, 148.8, 136.5, 134.6, 133.4, 123.3, 121.4, 41.2, 35.7, 30.6, 28.9, 28.5, 23.0, 22.7, 7.8 ppm. HRMS (ESI)  $m/z$  calcd for  $\text{C}_{16}\text{H}_{21}\text{NO}$   $[\text{M}+\text{H}]^+$  244.1696; found: 244.1698.

1-(5-methyl-2-(pyridin-2-yl)cyclohex-1-en-1-yl)pentan-3-one, 3ja

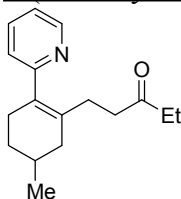

Yield 96 %, colourless oil;  $^1\text{H NMR}$  (400 MHz,  $\text{CDCl}_3$ )  $\delta$  = 8.61-8.56 (m, 1 H), 7.71-7.65 (m, 1 H), 7.22-7.12 (m, 2 H), 2.57-2.44 (m, 2 H), 2.43-2.36 (m, 2 H), 2.33 (q,  $J$  = 7.2 Hz, 2H), 2.26-2.05 (m, 3 H), 1.85-1.70 (m, 3 H), 1.39-1.28 (m, 1 H), 1.01 (d,  $J$  = 6.0 Hz, 3 H), 0.98 (t,  $J$  = 7.6 Hz, 3 H), ppm;  $^{13}\text{C NMR}$  (100 MHz,  $\text{CDCl}_3$ )  $\delta$  = 211.4, 161.3, 148.5, 136.9, 134.5, 132.6, 123.5, 121.5, 41.1, 37.6, 35.7, 31.1, 30.8, 28.7, 28.4, 21.8, 7.8 ppm. HRMS (ESI)  $m/z$  calcd for  $\text{C}_{17}\text{H}_{23}\text{NO}$   $[\text{M}+\text{H}]^+$  258.1852; found: 258.1855.

1-(2-(pyridin-2-yl)cyclohept-1-en-1-yl)pentan-3-one, 3ka

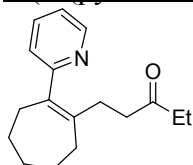

Yield 86 %, colorless oil;  $^1\text{H NMR}$  (400 MHz,  $\text{CDCl}_3$ )  $\delta$  = 8.58-8.53 (m, 1 H), 7.66-7.59 (m, 1 H), 7.14-7.07 (m, 2 H), 2.55-2.48 (m, 4 H), 2.35 (q,  $J$  = 7.2 Hz, 2 H), 2.32-2.18 (m, 4 H), 1.87-1.77 (m, 2 H), 1.67-1.54 (m, 4 H), 1.00 (t,  $J$  = 7.6 Hz, 3 H) ppm;  $^{13}\text{C NMR}$  (100 MHz,  $\text{CDCl}_3$ )  $\delta$  = 211.4, 162.8, 148.8, 141.3, 139.1, 136.3, 123.0, 121.1, 41.1, 35.7, 34.6, 33.7, 32.6, 30.4, 26.9, 26.5, 7.8 ppm. HRMS (ESI)  $m/z$  calcd for  $\text{C}_{17}\text{H}_{23}\text{NO}$   $[\text{M}+\text{H}]^+$  258.1852; found: 258.1856.

1-(3-(pyridin-2-yl)thiophen-2-yl)pentan-3-one, 3la

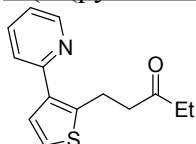

Yield 97 %, colorless oil;  $^1\text{H NMR}$  (400 MHz,  $\text{CDCl}_3$ )  $\delta$  = 8.67-8.61 (m, 1 H), 7.76-7.70 (m, 1 H), 7.51-7.46 (m, 1 H), 7.29-7.11 (m, 3 H), 3.38 (t,  $J$  = 7.6 Hz, 2 H), 2.86 (t,  $J$  = 7.2 Hz, 2 H), 2.42 (q,  $J$  = 7.2 Hz, 2 H), 1.05 (t,  $J$  = 7.2 Hz, 3 H) ppm;  $^{13}\text{C NMR}$  (100 MHz,  $\text{CDCl}_3$ )  $\delta$  = 210.4, 154.9, 149.2, 142.4, 136.9, 136.7, 128.6, 122.8, 122.2, 121.4, 44.1, 36.0, 23.2, 7.80 ppm. HRMS (ESI)  $m/z$  calcd for  $\text{C}_{14}\text{H}_{15}\text{NOS}$   $[\text{M}+\text{H}]^+$  246.0947; found: 246.0951.

1-(2-(pyridin-2-yl)thiophen-3-yl)pentan-3-one, 3ma

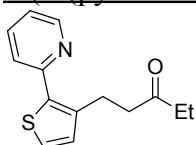

Yield 82 %, colorless oil;  $^1\text{H NMR}$  (400 MHz,  $\text{CDCl}_3$ )  $\delta$  = 8.65-8.60 (m, 1 H), 7.76-7.68 (m, 1 H), 7.58-7.52 (m, 1 H), 7.32-7.28 (m, 1 H), 7.21-7.14 (m, 1H), 6.97-6.94 (m, 1 H), 3.20 (t,  $J$  = 7.6 Hz, 2 H), 2.79 (t,  $J$  = 7.6 Hz, 2 H), 2.43 (q,  $J$  = 7.2 Hz, 2 H), 1.05 (t,  $J$  = 7.2 Hz, 3 H) ppm;  $^{13}\text{C NMR}$  (100 MHz,  $\text{CDCl}_3$ )  $\delta$  = 211.0, 153.1, 149.5, 139.3, 137.7, 136.8, 130.6, 125.8, 122.0, 121.6, 42.9, 36.0, 23.8, 7.8 ppm.

1-(3-(pyridin-2-yl)furan-2-yl)pentan-3-one, 3na

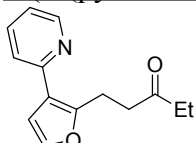

Yield 98 %, colorless oil;  $^1\text{H NMR}$  (400 MHz,  $\text{CDCl}_3$ )  $\delta$  = 8.63-8.58 (m, 1 H), 7.72-7.68 (m, 1 H), 7.50-7.44 (m, 1 H), 7.36-7.32 (m, 1 H), 7.18-7.11 (m, 1H), 6.77-6.73 (m, 1 H), 3.34 (t,  $J$  = 7.2 Hz, 2 H), 2.87 (t,  $J$  = 7.2 Hz, 2 H), 2.46 (q,  $J$  = 7.2 Hz, 2 H), 1.06 (t,  $J$  = 7.2 Hz, 3 H) ppm;  $^{13}\text{C NMR}$  (100 MHz,  $\text{CDCl}_3$ )  $\delta$  = 210.6, 153.6, 152.7, 149.1, 140.9, 136.9, 121.4, 121.0, 120.2, 110.3, 40.2, 35.9, 22.3, 7.8 ppm. HRMS (ESI)  $m/z$  calcd for  $\text{C}_{14}\text{H}_{15}\text{NO}_2$   $[\text{M}+\text{H}]^+$  230.1176; found: 230.1178.

1-(2-(5-fluoropyridin-2-yl)phenyl)pentan-3-one, 3oa

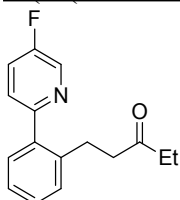

Yield 94 %, colorless oil;  $^1\text{H NMR}$  (400 MHz,  $\text{CDCl}_3$ )  $\delta$  = 8.55-8.48 (m, 1 H), 7.52-7.45 (m, 1 H), 7.44-7.38 (m, 1 H), 7.36-7.25 (m, 4 H), 2.93 (t,  $J$  = 7.6 Hz, 2 H), 2.67 (t,  $J$  = 7.2 Hz, 2 H), 2.34 (q,  $J$  = 7.2 Hz, 2 H), 1.00 (t,  $J$  = 7.2 Hz, 3 H) ppm;  $^{13}\text{C NMR}$  (100 MHz,  $\text{CDCl}_3$ )  $\delta$  = 210.9, 158.5 (d,  $J$  = 254.3 Hz), 156.0 (d,  $J$  = 3.1 Hz), 139.3, 139.0, 137.1 (d,  $J$  = 23.6 Hz), 133.5 (d,  $J$  = 11.2 Hz), 129.9 (d,  $J$  = 2.2 Hz), 128.8, 126.3, 125.0 (d,  $J$  = 4.5 Hz), 123.6 (d,  $J$  = 17.8 Hz), 43.9, 35.9, 27.4, 7.8 ppm. HRMS (ESI)  $m/z$  calcd for  $\text{C}_{16}\text{H}_{16}\text{FNO}$   $[\text{M}+\text{H}]^+$  258.1289; found: 258.1287.

1-(2-(4-methylpyridin-2-yl)cyclohex-1-en-1-yl)pentan-3-one, 3pa

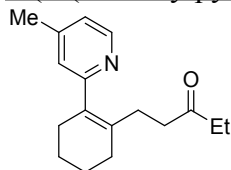

Yield 88 %, colorless oil;  $^1\text{H NMR}$  (400 MHz,  $\text{CDCl}_3$ )  $\delta$  = 8.44-8.38 (m, 1 H), 6.98-6.93 (m, 2 H), 2.52-2.44 (m, 2 H), 2.37-2.27 (m, 7 H), 2.21-2.13 (m, 2 H), 2.11-2.04 (m, 2 H), 1.76-1.66 (m, 4 H), 0.98 (t,  $J$  = 7.6 Hz, 3 H) ppm;  $^{13}\text{C NMR}$  (100 MHz,  $\text{CDCl}_3$ )  $\delta$  = 211.6, 161.6, 148.8, 147.3, 134.0, 133.7, 123.9, 122.3, 41.3, 35.7, 30.6, 28.9, 28.6, 23.0, 22.8, 21.1, 7.8 ppm. HRMS (ESI)  $m/z$  calcd for  $\text{C}_{17}\text{H}_{23}\text{NO}$   $[\text{M}+\text{H}]^+$  258.1852; found: 258.1853.

1-(2-(5-methylpyridin-2-yl)cyclohex-1-en-1-yl)pentan-3-one, 3qa

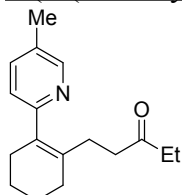

Yield 88 %, colorless oil;  $^1\text{H NMR}$  (400 MHz,  $\text{CDCl}_3$ )  $\delta$  = 8.42-8.39 (m, 1 H), 7.53-7.47 (m, 1 H), 7.11-7.06 (m, 1 H), 2.53-2.46 (m, 2 H), 2.37-2.28 (m, 7 H), 2.21-2.14 (m, 2 H), 2.11-2.04 (m, 2 H), 1.76-1.67 (m, 4 H), 0.99 (t,  $J$  = 7.6 Hz, 3 H) ppm;  $^{13}\text{C NMR}$  (100 MHz,  $\text{CDCl}_3$ )  $\delta$  = 211.5, 158.4, 148.7, 137.6, 134.7, 132.8, 130.9, 122.9, 41.1, 35.7, 30.6, 28.9, 28.5, 23.0, 22.8, 18.2, 7.8 ppm. HRMS (ESI)  $m/z$  calcd for  $\text{C}_{17}\text{H}_{23}\text{NO}$   $[\text{M}+\text{H}]^+$  258.1852; found: 258.1854.

1-(5-methyl-2-(pyrimidin-2-yl)phenyl)pentan-3-one, 3ra

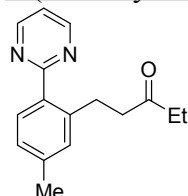

Yield 82 %, colorless oil;  $^1\text{H NMR}$  (400 MHz,  $\text{CDCl}_3$ )  $\delta$  = 8.83-8.79 (m, 2 H), 7.79-7.75 (m, 1 H), 7.23-7.19 (m, 1 H), 7.16-7.10 (m, 2 H), 3.14 (t,  $J$  = 8.4 Hz, 2 H), 2.78 (t,  $J$  = 8.0 Hz, 2 H), 2.39 (q,  $J$  = 7.2 Hz, 2 H), 2.38 (s, 3 H), 1.03 (t,  $J$  = 7.2 Hz, 3 H) ppm;  $^{13}\text{C NMR}$  (100 MHz,  $\text{CDCl}_3$ )  $\delta$  = 211.4, 167.2, 156.9 (2C), 140.6, 139.8, 134.9, 131.4, 130.9, 127.2, 118.4, 44.6, 35.9, 28.4, 21.3, 7.8 ppm. HRMS (ESI)  $m/z$  calcd for  $\text{C}_{16}\text{H}_{18}\text{N}_2\text{O}$   $[\text{M}+\text{H}]^+$  255.1492; found: 255.1496.

1-(2-(9-benzyl-9H-purin-6-yl)cyclohex-1-en-1-yl)pentan-3-one, 3sa

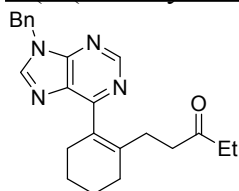

Yield 98 %, colorless oil;  $^1\text{H NMR}$  (400 MHz,  $\text{CDCl}_3$ )  $\delta$  = 8.97 (s, 1 H), 8.01 (s, 1 H), 7.42-7.31 (m, 5 H), 5.45 (s, 2 H), 2.63-2.55 (m, 2 H), 2.54-2.47 (m, 2 H), 2.34-2.26 (q,  $J$  = 7.6 Hz, 2 H), 2.24-2.14 (m, 4 H), 1.85-1.73 (m, 4H), 0.95 (t,  $J$  = 7.6 Hz, 3 H) ppm;  $^{13}\text{C NMR}$  (100 MHz,  $\text{CDCl}_3$ )  $\delta$  = 211.4, 161.0, 152.5, 151.6, 143.9, 138.6, 135.0, 131.6, 129.2(2C), 128.8, 128.6, 127.9 (2C), 47.3, 41.1, 35.7, 29.5, 29.1, 29.1, 22.7, 22.6, 7.8 ppm. HRMS (ESI)  $m/z$  calcd for  $\text{C}_{23}\text{H}_{26}\text{N}_4\text{O}$   $[\text{M}+\text{H}]^+$  375.2179; found: 375.2183.



### 1-(3-(9-methyl-9H-purin-6-yl)furan-2-yl)pentan-3-one, 3ta

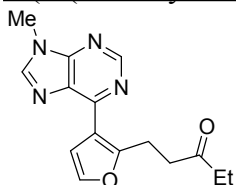

Yield 98 %, colorless oil;  $^1\text{H NMR}$  (400 MHz,  $\text{CDCl}_3$ )  $\delta$  = 8.91 (s, 1 H), 8.03 (s, 1 H), 7.63-7.59 (m, 1 H), 7.43-7.40 (m, 1 H), 3.91 (s, 3 H), 3.60 (t,  $J$  = 7.2 Hz, 2 H), 2.93 (t,  $J$  = 7.6 Hz, 2 H), 2.48 (q,  $J$  = 7.2 Hz, 2 H), 1.07 (t,  $J$  = 7.2 Hz, 3 H) ppm;  $^{13}\text{C NMR}$  (100 MHz,  $\text{CDCl}_3$ )  $\delta$  = 210.4, 158.1, 152.1, 151.3, 144.2, 141.1(2C), 130.3, 116.6, 112.2, 40.2, 35.8, 29.8, 23.2, 7.8 ppm. HRMS (ESI)  $m/z$  calcd for  $\text{C}_{15}\text{H}_{16}\text{N}_4\text{O}_2$   $[\text{M}+\text{H}]^+$  285.1346; found: 285.1347.

### 1-(2-(9-benzyl-9H-purin-6-yl)-5-methylcyclohex-1-en-1-yl)pentan-3-one, 3ua

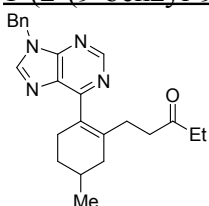

Yield 95 %, colourless oil;  $^1\text{H NMR}$  (400 MHz,  $\text{CDCl}_3$ )  $\delta$  = 9.24 (s, 1 H), 8.35 (s, 1 H), 7.44-7.30 (m, 5 H), 5.54 (s, 2 H), 2.68-2.55 (m, 4 H), 2.35 (q,  $J$  = 7.2 Hz, 2 H), 2.27-2.17 (m, 2 H), 1.95-1.80 (m, 4 H), 1.49-1.36 (m, 1H), 1.02 (d,  $J$  = 5.6 Hz, 3H), 0.93 (t,  $J$  = 7.2 Hz, 3 H) ppm;  $^{13}\text{C NMR}$  (100 MHz,  $\text{CDCl}_3$ )  $\delta$  = 211.6, 157.2, 152.7, 149.5, 147.1, 143.6, 134.1, 130.6, 129.3(2C), 129.0, 128.4 (2C), 124.1, 48.1, 40.2, 37.7, 35.8, 30.5, 29.8, 28.9, 28.1, 21.6, 7.8 ppm. HRMS (ESI)  $m/z$  calcd for  $\text{C}_{24}\text{H}_{28}\text{N}_4\text{O}$   $[\text{M}+\text{H}]^+$  389.2336; found: 389.2238.

### 1-(methyl-2-(pyridin-2-yl)phenyl)pentan-3-one, 3va

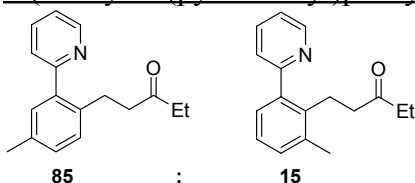

Yield 85 %, colorless oil;  $^1\text{H NMR}$  (400 MHz,  $\text{CDCl}_3$ )  $\delta$  = 8.71-8.67 (m, 1 H), 7.82-7.79 (m, 1 H), 7.45-7.42 (m, 1 H), 7.32-7.29 (m, 1 H), 7.18-7.16 (m, 3H), 2.91 (t,  $J$  = 7.6 Hz, 2 H), 2.63 (t,  $J$  = 7.6 Hz, 2 H), 2.35 (s, 3H), 2.32 (q,  $J$  = 7.6 Hz, 2 H), 0.98 (t,  $J$  = 7.6 Hz, 3 H) ppm;  $^{13}\text{C NMR}$  (100 MHz,  $\text{CDCl}_3$ )  $\delta$  = 211.1, 159.6, 148.5, 139.4, 137.1, 136.1, 135.9, 130.6, 129.7, 129.5, 124.4, 122.0, 44.0, 35.9, 27.1, 21.0, 7.80 ppm. HRMS (ESI)  $m/z$  calcd for  $\text{C}_{17}\text{H}_{19}\text{NO}$   $[\text{M}+\text{H}]^+$  254.1539; found: 254.1541.

### 4-(3-oxopentyl)-3-(pyridin-2-yl)benzaldehyde, 3wa

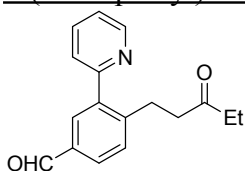

Yield 93 %, colourless oil;  $^1\text{H NMR}$  (400 MHz,  $\text{CDCl}_3$ )  $\delta$  = 10.01 (s, 1 H), 8.73-8.69 (m, 1 H), 7.89-7.83 (m, 3 H), 7.52-7.46 (m, 2 H), 7.38-7.34 (m, 1 H), 3.04 (t,  $J$  = 8.0 Hz, 2 H), 2.71 (t,  $J$  = 8.0 Hz, 2 H), 2.34 (q,  $J$  = 7.6 Hz, 2 H), 0.99 (t,  $J$  = 7.6 Hz, 3 H) ppm;  $^{13}\text{C NMR}$  (100 MHz,  $\text{CDCl}_3$ )  $\delta$  = 210.2, 191.7, 158.2, 148.8, 146.8, 140.5, 137.4, 134.7, 131.5, 130.7, 129.6, 124.3, 122.7, 43.2, 35.9, 27.7, 7.78 ppm. HRMS (ESI)  $m/z$  calcd for  $\text{C}_{17}\text{H}_{17}\text{NO}_2$   $[\text{M}+\text{H}]^+$  268.1332; found: 268.1332.

1-phenyl-3-(2-(pyridin-2-yl)cyclohex-1-en-1-yl)propan-1-one, **3ib**

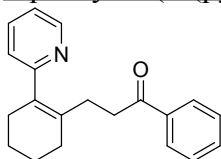

Yield 83 %, colourless oil;  $^1\text{H NMR}$  (400 MHz,  $\text{CDCl}_3$ )  $\delta$  = 8.66-8.58 (m, 1 H), 7.91-7.85 (m, 2 H), 7.72-7.66 (m, 1 H), 7.54-7.49 (m, 1 H), 7.43-7.37 (m, 2H), 7.24-7.16 (m, 2H), 3.07 (t,  $J$  = 8.0 Hz, 2 H), 2.42-2.30 (m, 4 H), 2.21-2.12 (m, 2 H), 1.80-1.69 (m, 4 H) ppm;  $^{13}\text{C NMR}$  (100 MHz,  $\text{CDCl}_3$ )  $\delta$  = 200.1, 161.1, 148.2, 137.4, 136.6, 135.4, 132.9 (2C), 128.5 (2C), 128.1 (2C), 123.7, 121.6, 37.6, 30.6, 29.2, 29.0, 22.9, 22.7 ppm. HRMS (ESI)  $m/z$  calcd for  $\text{C}_{20}\text{H}_{21}\text{NO}$   $[\text{M}+\text{H}]^+$  292.1696; found: 292.1696.

Ethyl-3-(2-(pyridin-2-yl)phenyl)propanoate, **3ac**<sup>[8]</sup>

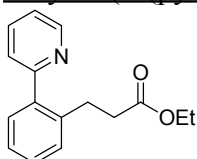

Yield 86 %, colorless oil;  $^1\text{H NMR}$  (400 MHz,  $\text{CDCl}_3$ )  $\delta$  = 8.72-8.65 (m, 1 H), 7.83-7.73 (m, 1 H), 7.44-7.40 (m, 1 H), 7.36-7.24 (m, 5 H), 4.06 (q,  $J$  = 7.2 Hz, 2 H), 3.04 (t,  $J$  = 7.6 Hz, 2 H), 2.52 (t,  $J$  = 8.0 Hz, 2 H), 1.19 (t,  $J$  = 7.2 Hz, 3 H) ppm;  $^{13}\text{C NMR}$  (100 MHz,  $\text{CDCl}_3$ )  $\delta$  = 173.1, 159.8, 149.0, 140.3, 138.6, 136.5, 129.9, 129.8, 128.6, 126.4, 124.1, 121.9, 60.3, 35.7, 28.4, 14.2 ppm.

Methyl 3-(5-methoxy-2-(pyridin-2-yl)phenyl)propanoate, **3bd**

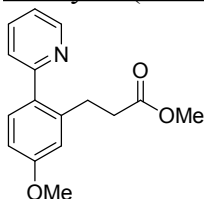

Yield 90 %, colourless oil;  $^1\text{H NMR}$  (400 MHz,  $\text{CDCl}_3$ )  $\delta$  = 8.69-8.65 (m, 1 H), 7.80-7.73 (m, 1 H), 7.42-7.37 (m, 1 H), 7.34-7.29 (m, 1 H), 7.27-7.22 (m, 1 H), 6.87-6.81 (m, 2 H), 3.84 (s, 3 H), 3.61 (s, 3 H), 3.05 (t,  $J$  = 7.6 Hz, 2 H), 2.56 (t,  $J$  = 8.0 Hz, 2 H) ppm;  $^{13}\text{C NMR}$  (100 MHz,  $\text{CDCl}_3$ )  $\delta$  = 173.5, 159.8, 159.3, 148.7, 140.3, 136.8, 132.5, 131.4, 124.2, 121.6, 115.3, 111.7, 55.3, 51.6, 35.5, 28.7 ppm. HRMS (ESI)  $m/z$  calcd for  $\text{C}_{16}\text{H}_{17}\text{NO}_3$   $[\text{M}+\text{H}]^+$  272.1281; found: 272.1282.

N-methyl-3-(2-(pyridin-2-yl)cyclohex-1-en-1-yl)propanamide, **3ie**

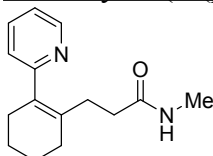

Yield 87 %, colorless oil;  $^1\text{H NMR}$  (400 MHz,  $\text{CDCl}_3$ )  $\delta$  = 8.60-8.56 (m, 1 H), 7.68-7.61 (m, 1 H), 7.17-7.10 (m, 2 H), 3.60 (s, 3 H), 2.40-2.31 (m, 4 H), 2.30-2.23 (m, 2 H), 2.15-2.05 (m, 2 H), 1.78-1.67 (m, 4 H) ppm;  $^{13}\text{C NMR}$  (100 MHz,  $\text{CDCl}_3$ )  $\delta$  = 173.9, 161.6, 149.1, 136.3, 134.1, 133.7, 123.2, 121.3, 51.5, 32.9, 30.6, 29.5, 28.7, 23.0, 22.8 ppm. HRMS (ESI)  $m/z$  calcd for  $\text{C}_{15}\text{H}_{20}\text{N}_2\text{O}$   $[\text{M}+\text{H}]^+$  245.1648; found: 245.1650.

### 3-methyl-4-(pyridin-2-yl)indolin-2-one, 5a

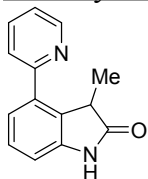

Yield 82 %, white solid;  $^1\text{H}$  NMR (400 MHz,  $\text{CDCl}_3$ )  $\delta$  = 9.11 (br s, 1 NH), 8.74-8.69 (m, 1 H), 7.84-7.77 (m, 1 H), 7.62-7.57 (m, 1 H), 7.34-7.22 (m, 3 H), 6.98-6.92 (m, 1 H), 4.20 (q,  $J$  = 7.6 Hz, 1 H), 1.13 (d,  $J$  = 7.6 Hz, 3 H) ppm;  $^{13}\text{C}$  NMR (100 MHz,  $\text{CDCl}_3$ )  $\delta$  = 181.7, 157.5, 149.4, 142.2, 136.8 (2C), 129.7, 128.2, 122.63, 122.61, 122.4, 110.0, 41.4, 14.7 ppm. HRMS (ESI)  $m/z$  calcd for  $\text{C}_{14}\text{H}_{12}\text{N}_2\text{O}$   $[\text{M}+\text{H}]^+$  225.1022; found: 225.1026.

### 3,7-dimethyl-4-(pyridin-2-yl)indolin-2-one, 5b

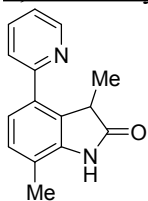

Yield 87 %, white solid;  $^1\text{H}$  NMR (400 MHz,  $d^6$ -DMSO)  $\delta$  = 10.48 (s br, 1 NH), 8.68-8.63 (m, 1 H), 7.90-7.83 (m, 1 H), 7.75-7.70 (m, 1 H), 7.38-7.32 (m, 1 H), 7.22-7.17 (m, 1 H), 7.14-7.09 (m, 1 H), 4.02 (q,  $J$  = 7.2 Hz, 1 H), 2.25 (s, 3 H), 0.97 (d,  $J$  = 7.6 Hz, 3 H) ppm;  $^{13}\text{C}$  NMR (100 MHz,  $d^6$ -DMSO)  $\delta$  = 180.3, 156.9, 149.2, 141.7, 136.9, 133.7, 129.2, 128.7, 122.3, 122.2, 121.6, 119.1, 40.9, 16.5, 14.6 ppm. HRMS (ESI)  $m/z$  calcd for  $\text{C}_{15}\text{H}_{14}\text{N}_2\text{O}$   $[\text{M}+\text{H}]^+$  239.1179; found: 239.1180.

### 4-(4,5-dihydrooxazol-2-yl)-3-methylindolin-2-one, 5c

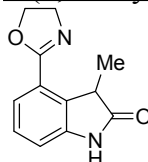

Yield 76 %, white solid;  $^1\text{H}$  NMR (400 MHz,  $\text{CHCl}_3$ )  $\delta$  = 9.36 (s br, 1 NH), 7.60-7.53 (m, 1 H), 7.29-7.21 (m, 1 H), 7.06-7.00 (m, 1 H), 4.50-4.36 (m, 2 H), 4.14-4.09 (m, 2 H), 3.86 (q,  $J$  = 7.6 Hz, 1H), 1.53 (d,  $J$  = 7.6 Hz, 3H) ppm;  $^{13}\text{C}$  NMR (100 MHz,  $\text{CHCl}_3$ )  $\delta$  = 182.0, 163.3, 142.2, 131.5, 127.8, 124.4, 122.9, 112.4, 67.4, 55.0, 42.6, 15.9 ppm. HRMS (ESI)  $m/z$  calcd for  $\text{C}_{12}\text{H}_{12}\text{N}_2\text{O}_2$   $[\text{M}+\text{H}]^+$  217.0972; found: 217.0971.

### 4-(4,4-dimethyl-4,5-dihydrooxazol-2-yl)-3-methylindolin-2-one, 5d

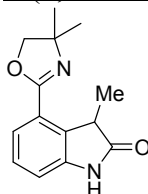

Yield 79 %, white solid;  $^1\text{H}$  NMR (400 MHz,  $\text{CHCl}_3$ )  $\delta$  = 9.14 (s br, 1 NH), 7.60-7.53 (m, 1 H), 7.26-7.20 (m, 1 H), 7.05-6.98 (m, 1 H), 4.12 (dt,  $J$  = 8.0, 6.4 Hz, 2 H), 3.90 (q,  $J$  = 7.6 Hz, 1H), 1.53 (d,  $J$  = 7.6 Hz, 3H), 1.40 (d,  $J$  = 3.2 Hz, 6 H) ppm;  $^{13}\text{C}$  NMR (100 MHz,  $\text{CHCl}_3$ )  $\delta$  = 182.2, 161.0, 142.2, 131.6, 127.8, 124.5, 122.9, 112.4, 79.0, 67.7, 42.5, 28.3, 28.2, 15.8 ppm. HRMS (ESI)  $m/z$  calcd for  $\text{C}_{14}\text{H}_{16}\text{N}_2\text{O}_2$   $[\text{M}+\text{H}]^+$  245.1285; found: 245.1282.

4-(4,4-dimethyl-4,5-dihydrooxazol-2-yl)-3,5-dimethylindolin-2-one, 5e

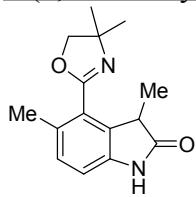

Yield 84 %, white solid;  $^1\text{H NMR}$  (400 MHz,  $\text{CHCl}_3$ )  $\delta$  = 9.21 (s br, 1 NH), 7.05 (d,  $J$  = 8.0 Hz, 1 H), 6.84 (d,  $J$  = 8.0 Hz, 1 H), 4.15 (dt,  $J$  = 8.4, 2.0 Hz, 2 H), 3.76 (q,  $J$  = 7.6 Hz, 1H), 2.39 (s, 3 H), 1.45 (d,  $J$  = 2.8 Hz, 6H), 1.43 (d,  $J$  = 7.6 Hz, 3 H) ppm;  $^{13}\text{C NMR}$  (100 MHz,  $\text{CHCl}_3$ )  $\delta$  = 181.3, 161.3, 139.5, 131.3, 131.2, 129.8, 124.8, 111.4, 79.2, 67.8, 41.6, 28.5, 28.3, 19.6, 15.3 ppm. HRMS (ESI)  $m/z$  calcd for  $\text{C}_{15}\text{H}_{18}\text{N}_2\text{O}_2$   $[\text{M}+\text{H}]^+$  259.1441; found: 259.1444.

4-(4,4-dimethyl-4,5-dihydrooxazol-2-yl)-3,7-dimethylindolin-2-one, 5f

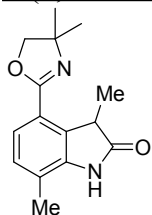

Yield 86 %, white solid;  $^1\text{H NMR}$  (400 MHz,  $\text{CHCl}_3$ )  $\delta$  = 9.88 (s br, 1 NH), 7.46 (d,  $J$  = 8.0 Hz, 1 H), 7.06 (d,  $J$  = 8.0 Hz, 1 H), 4.08 (dt,  $J$  = 8.4, 8.0 Hz, 2 H), 3.94 (q,  $J$  = 7.6 Hz, 1H), 2.35 (s, 3 H), 1.54 (d,  $J$  = 7.6 Hz, 3H), 1.38 (d,  $J$  = 3.2 Hz, 6 H) ppm;  $^{13}\text{C NMR}$  (100 MHz,  $\text{CHCl}_3$ )  $\delta$  = 182.7, 160.9, 140.9, 131.2, 129.1, 122.9, 122.4, 122.2, 78.8, 67.7, 42.9, 28.4, 28.3, 16.8, 16.0 ppm. HRMS (ESI)  $m/z$  calcd for  $\text{C}_{15}\text{H}_{18}\text{N}_2\text{O}_2$   $[\text{M}+\text{H}]^+$  259.1441; found: 259.1445.

4-(4,4-dimethyl-4,5-dihydrooxazol-2-yl)-5-fluoro-3-methylindolin-2-one, 5g

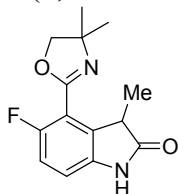

Yield 69 %, yellow solid;  $^1\text{H NMR}$  (400 MHz,  $\text{CHCl}_3$ )  $\delta$  = 9.31 (s br, 1 NH), 7.03-6.90 (m, 2 H), 4.14 (s, 2 H), 3.87 (q,  $J$  = 7.6 Hz, 1H), 1.47 (d,  $J$  = 7.6 Hz, 3H), 1.42 (d,  $J$  = 7.6 Hz, 6 H) ppm;  $^{13}\text{C NMR}$  (100 MHz,  $\text{CHCl}_3$ )  $\delta$  = 181.5, 157.2 ( $J$  = 2.6 Hz), 157.0 ( $J$  = 247.1 Hz), 137.7 ( $J$  = 2.6 Hz), 132.8 ( $J$  = 1.4 Hz), 115.3 ( $J$  = 24.7 Hz), 114.5 ( $J$  = 15.9 Hz), 112.4 ( $J$  = 7.7 Hz), 79.0, 68.0, 42.5 ( $J$  = 1.6 Hz), 28.4, 28.2, 15.3 ppm. HRMS (ESI)  $m/z$  calcd for  $\text{C}_{14}\text{H}_{15}\text{FN}_2\text{O}_2$   $[\text{M}+\text{H}]^+$  263.1190; found: 263.1194.

4-(4,4-dimethyl-4,5-dihydrooxazol-2-yl)-7-methoxy-3-methylindolin-2-one, 5h

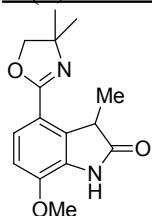

Yield 77 %, white solid;  $^1\text{H NMR}$  (400 MHz,  $\text{CHCl}_3$ )  $\delta$  = 8.12 (s br, 1 NH), 7.63 (d,  $J$  = 8.8 Hz, 1 H), 6.83 (d,  $J$  = 8.4 Hz, 1 H), 4.16-4.06 (m, 2 H), 3.92 (s, 3 H), 3.89 (q,  $J$  = 7.6 Hz, 1H), 1.53 (d,  $J$  = 7.6 Hz, 3H), 1.38 (s, 6 H) ppm;  $^{13}\text{C NMR}$  (100 MHz,  $\text{CHCl}_3$ )  $\delta$  = 180.5, 161.2, 146.0, 132.3, 130.6, 124.5, 116.8, 109.9, 79.1, 67.3, 55.8, 43.2, 28.3, 28.2, 16.0 ppm. HRMS (ESI)  $m/z$  calcd for  $\text{C}_{15}\text{H}_{18}\text{N}_2\text{O}_3$   $[\text{M}+\text{H}]^+$  275.1390; found: 275.1395.

3,3-dimethyl-4-(pyridin-2-yl)indolin-2-one, 5i

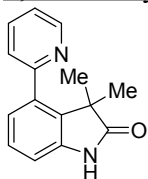

Yield 58 %, white solid;  $^1\text{H NMR}$  (400 MHz,  $\text{CDCl}_3$ )  $\delta$  = 9.03 (br s, 1 NH), 8.73-8.70 (m, 1 H), 7.82-7.76 (m, 1 H), 7.42-7.38 (m, 1 H), 7.36-7.31 (m, 1 H), 7.28-7.23 (m, 1 H), 7.02-6.96 (m, 2 H), 1.33 (s, 6 H) ppm;  $^{13}\text{C NMR}$  (100 MHz,  $\text{CDCl}_3$ )  $\delta$  = 184.4, 158.6, 148.5, 140.5, 138.4, 136.5, 133.2, 127.6, 124.3, 123.9, 122.5, 110.1, 46.3, 24.0 ppm. HRMS (ESI)  $m/z$  calcd for  $\text{C}_{15}\text{H}_{14}\text{N}_2\text{O}$   $[\text{M}+\text{H}]^+$  239.1179; found: 239.1180.

4-(4,4-dimethyl-4,5-dihydrooxazol-2-yl)-3,3-dimethylindolin-2-one, 5j

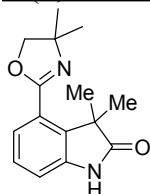

Yield 57 %, white solid;  $^1\text{H NMR}$  (400 MHz,  $\text{CHCl}_3$ )  $\delta$  = 9.46 (s br, 1 NH), 7.56-7.50 (m, 1 H), 7.29-7.19 (m, 1 H), 7.10-7.04 (m, 1 H), 4.15 (s, 2 H), 1.60 (s, 6H), 1.42 (s, 6 H) ppm;  $^{13}\text{C NMR}$  (100 MHz,  $\text{CHCl}_3$ )  $\delta$  = 184.6, 161.4, 141.1, 134.9, 127.6, 125.2, 124.2, 112.7, 79.1, 67.8, 46.8, 28.3, 22.3 ppm. HRMS (ESI)  $m/z$  calcd for  $\text{C}_{15}\text{H}_{18}\text{N}_2\text{O}_2$   $[\text{M}+\text{H}]^+$  259.1441; found: 259.1445.

4-(4,5-dihydrooxazol-2-yl)-3,3,7-trimethylindolin-2-one, 5k

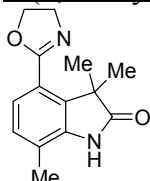

Yield 63 %, white solid;  $^1\text{H NMR}$  (400 MHz,  $\text{CHCl}_3$ )  $\delta$  = 9.35 (s br, 1 NH), 7.54 (d,  $J$  = 8.0 Hz, 1 H), 7.09 (d,  $J$  = 8.4 Hz, 1 H), 4.48 (t,  $J$  = 9.6 Hz, 2 H), 4.12 (t,  $J$  = 9.6 Hz, 2 H), 2.36 (s, 3H), 1.58 (s, 6H) ppm;  $^{13}\text{C NMR}$  (100 MHz,  $\text{CHCl}_3$ )  $\delta$  = 184.9, 163.7, 139.7, 134.5, 128.8, 126.2, 124.1, 122.5, 67.0, 55.0, 47.2, 22.2, 16.9 ppm. HRMS (ESI)  $m/z$  calcd for  $\text{C}_{13}\text{H}_{14}\text{N}_2\text{O}_2$   $[\text{M}+\text{H}]^+$  245.1285; found: 245.1280.

# Copies $^1\text{H}$ NMR, $^{13}\text{C}$ NMR

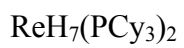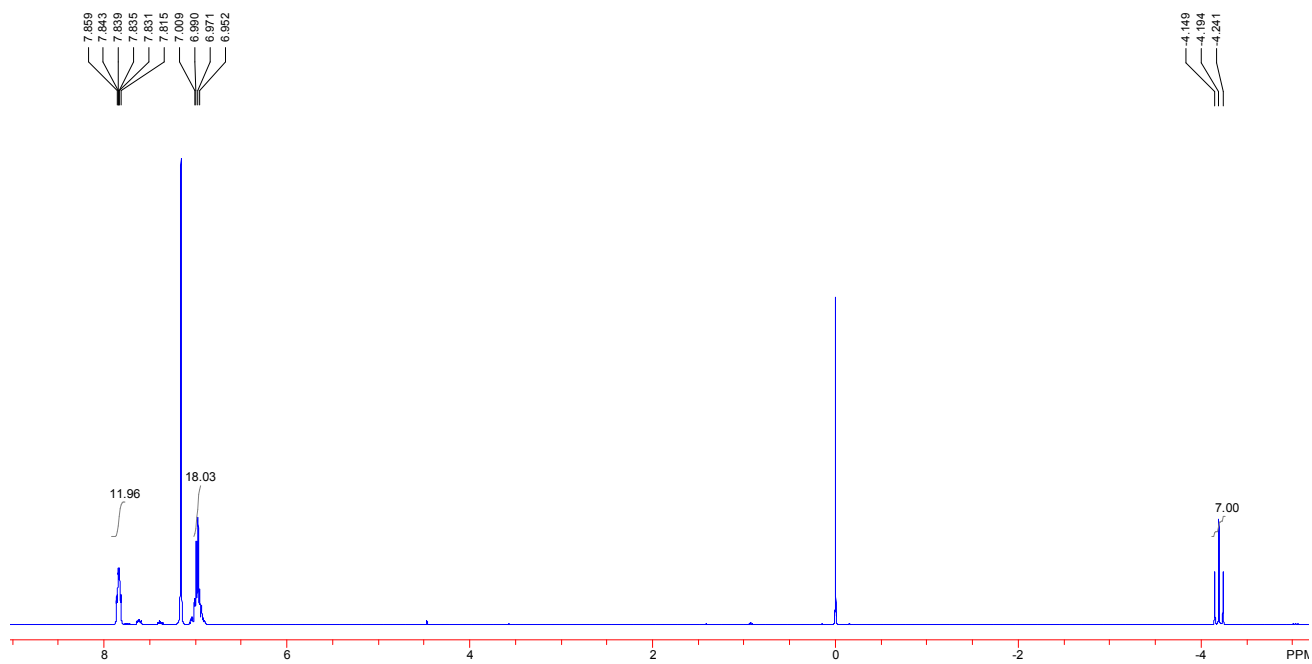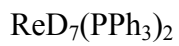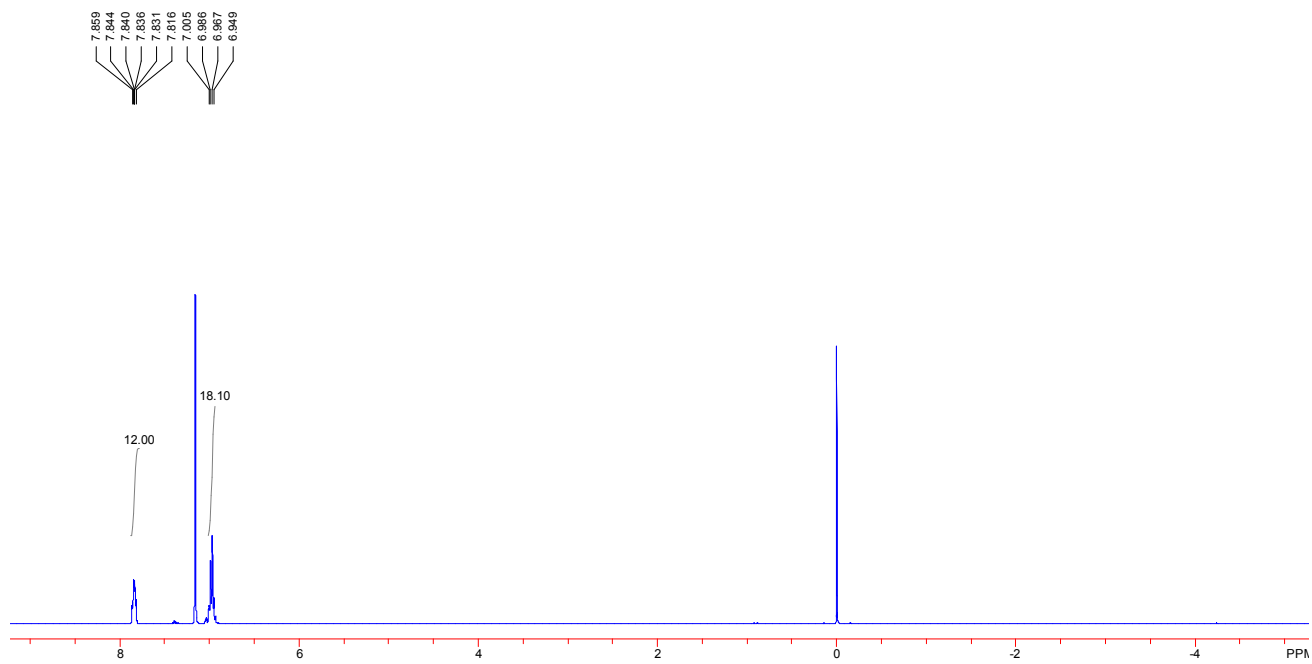

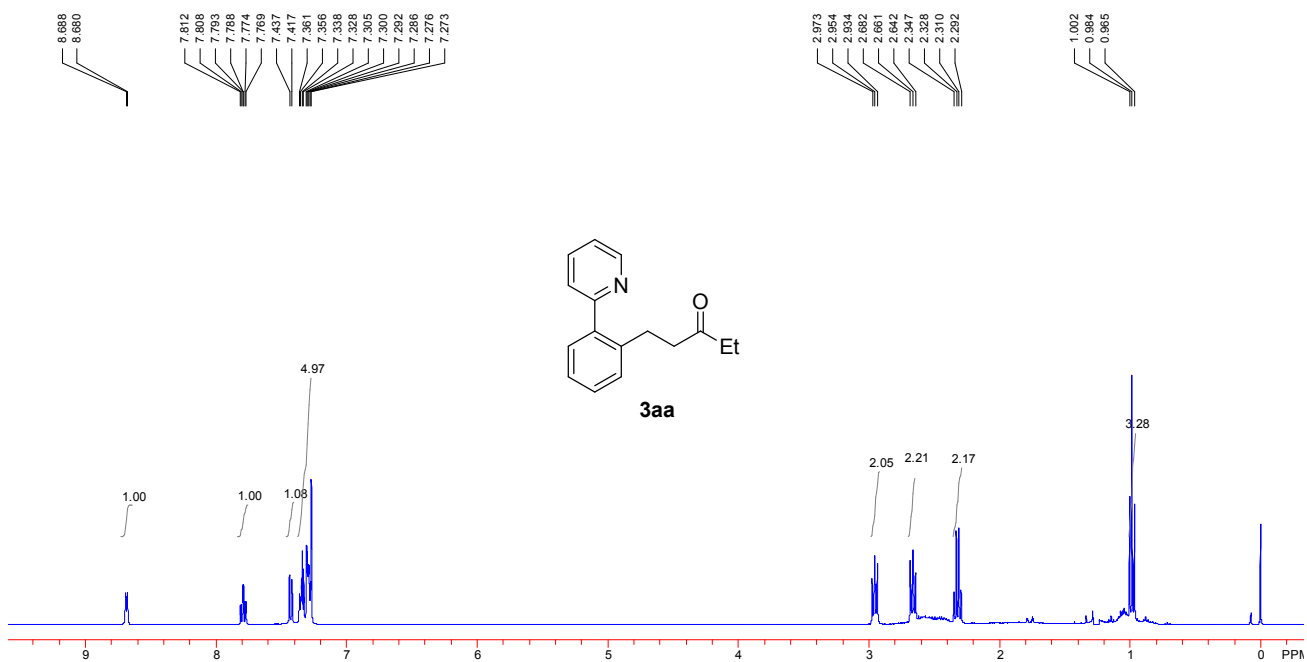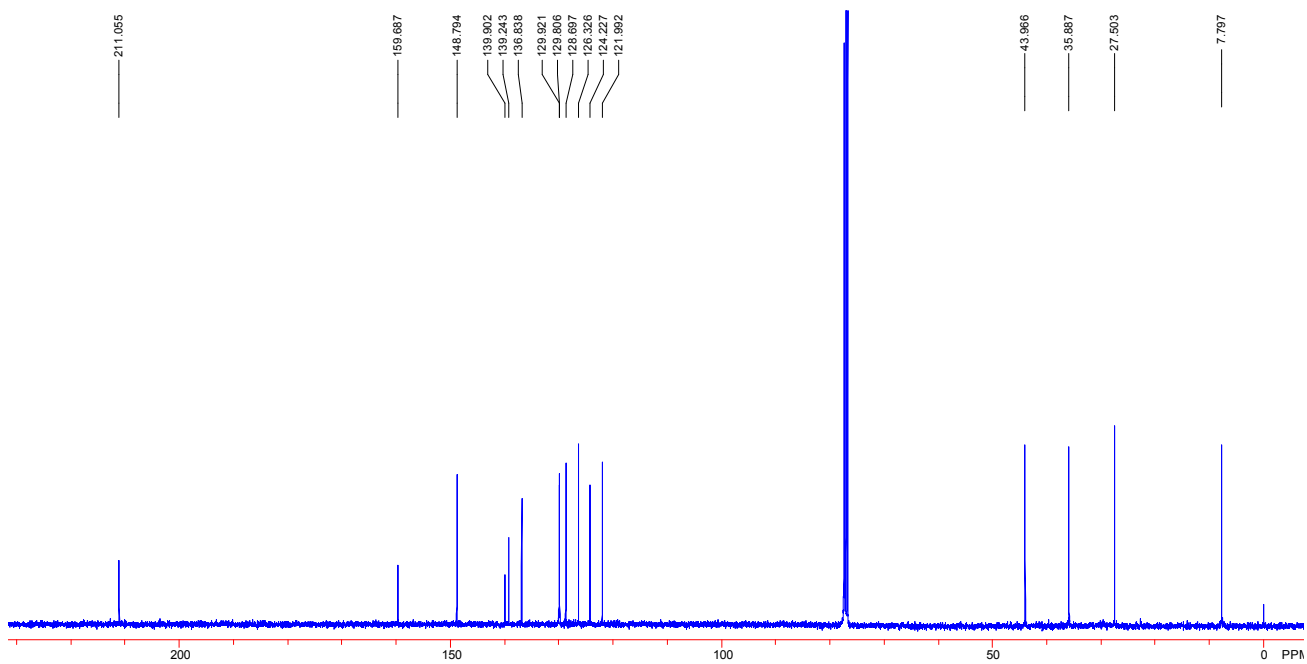

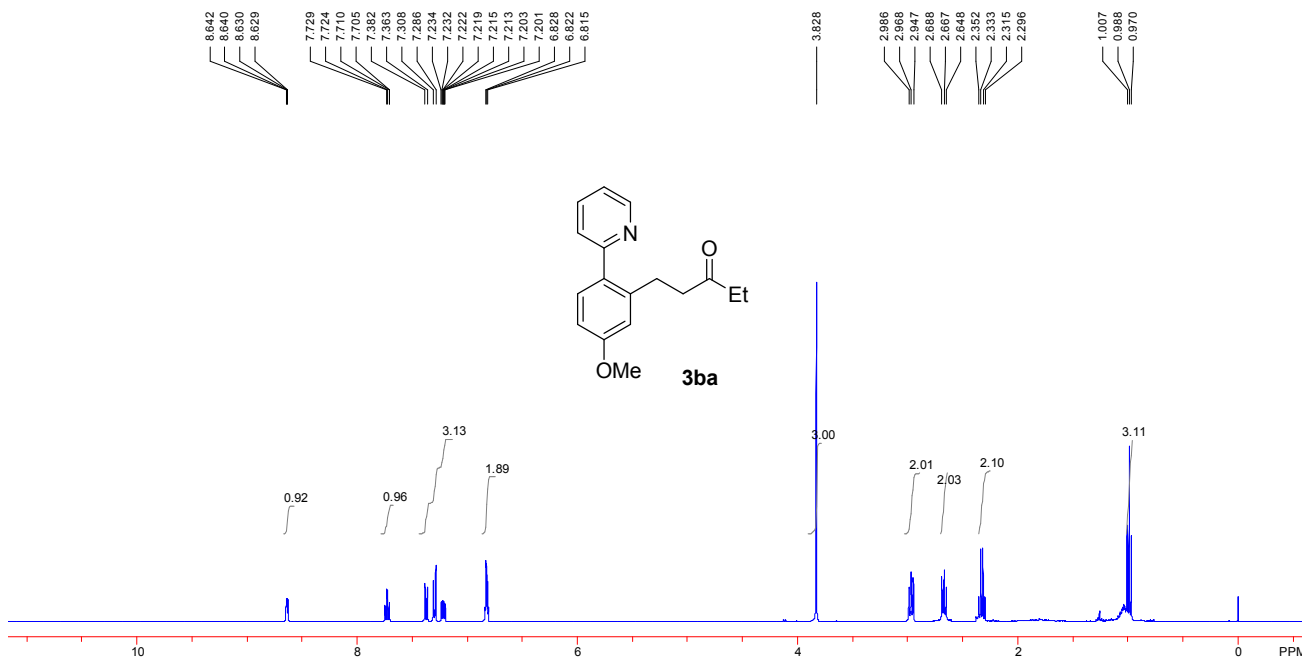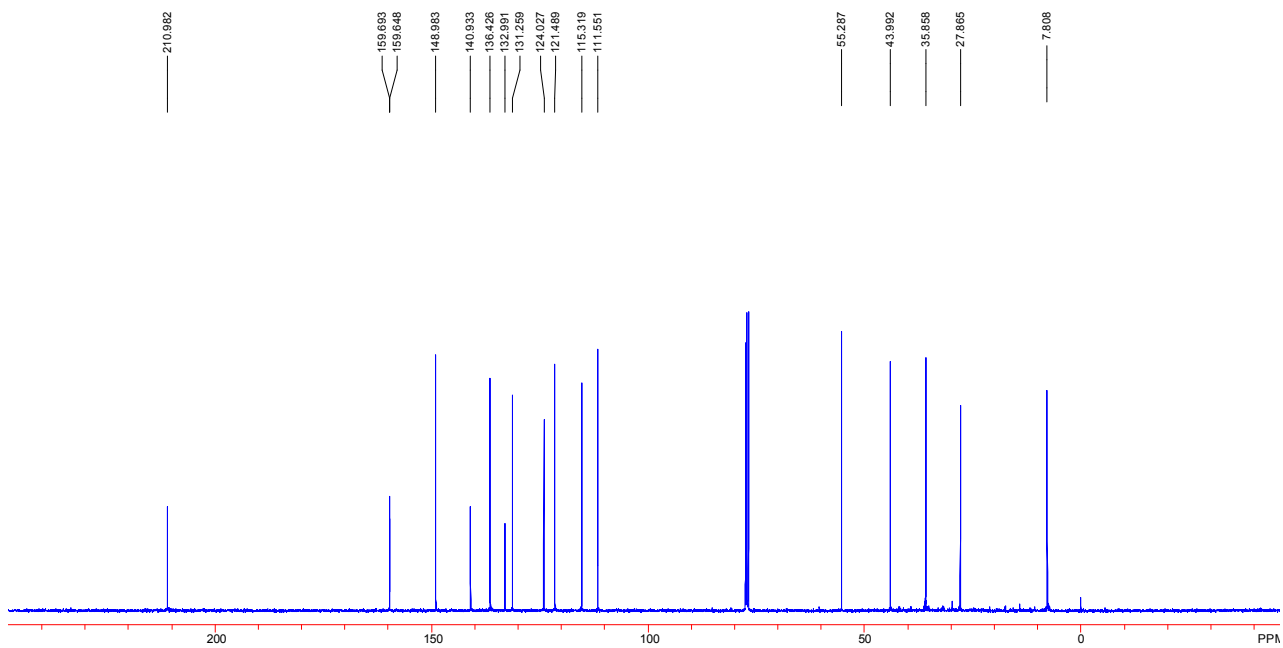



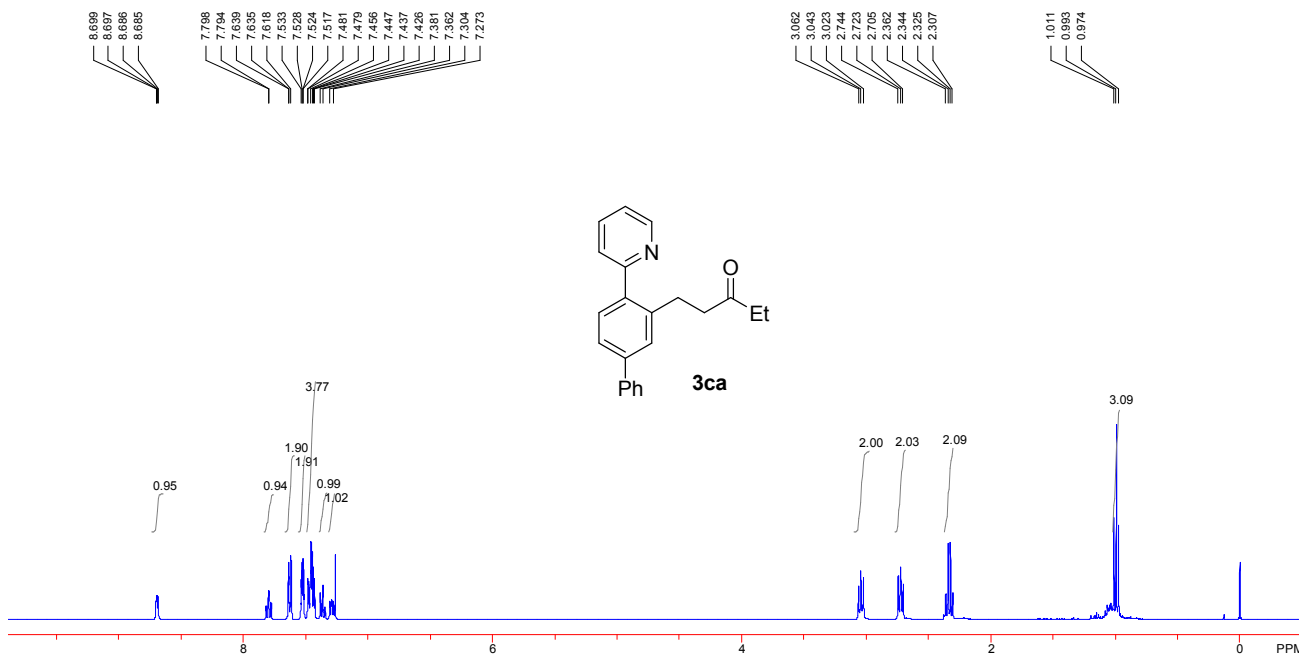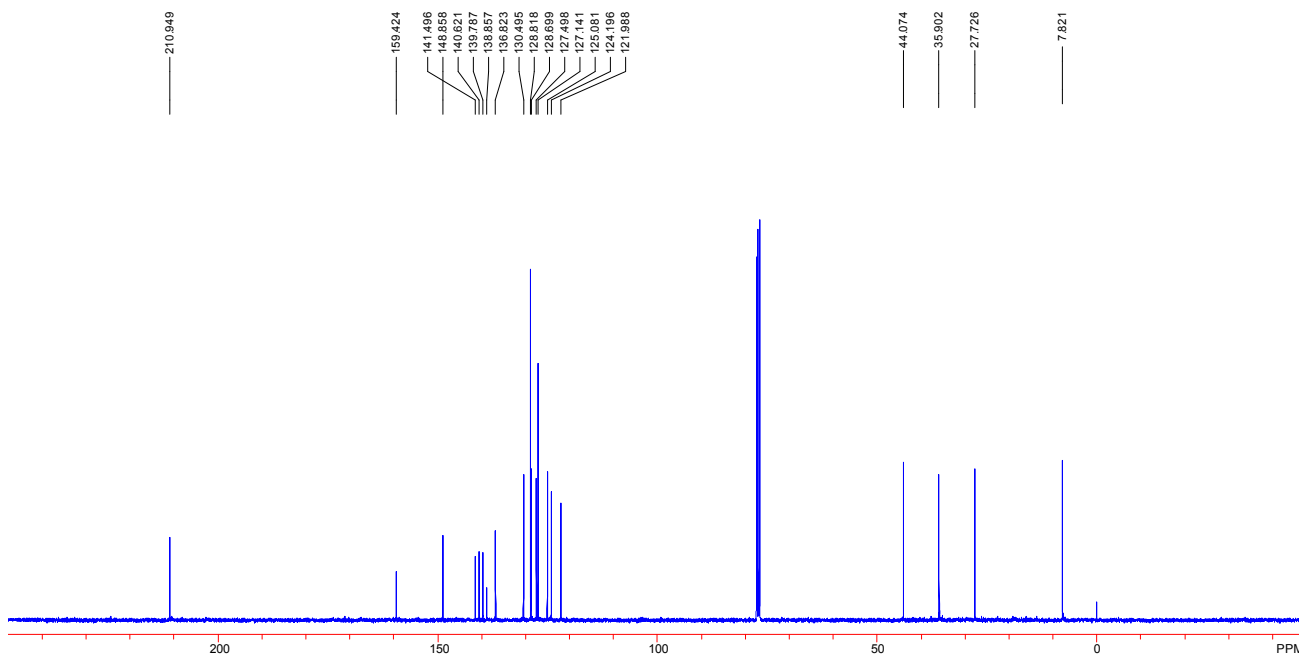

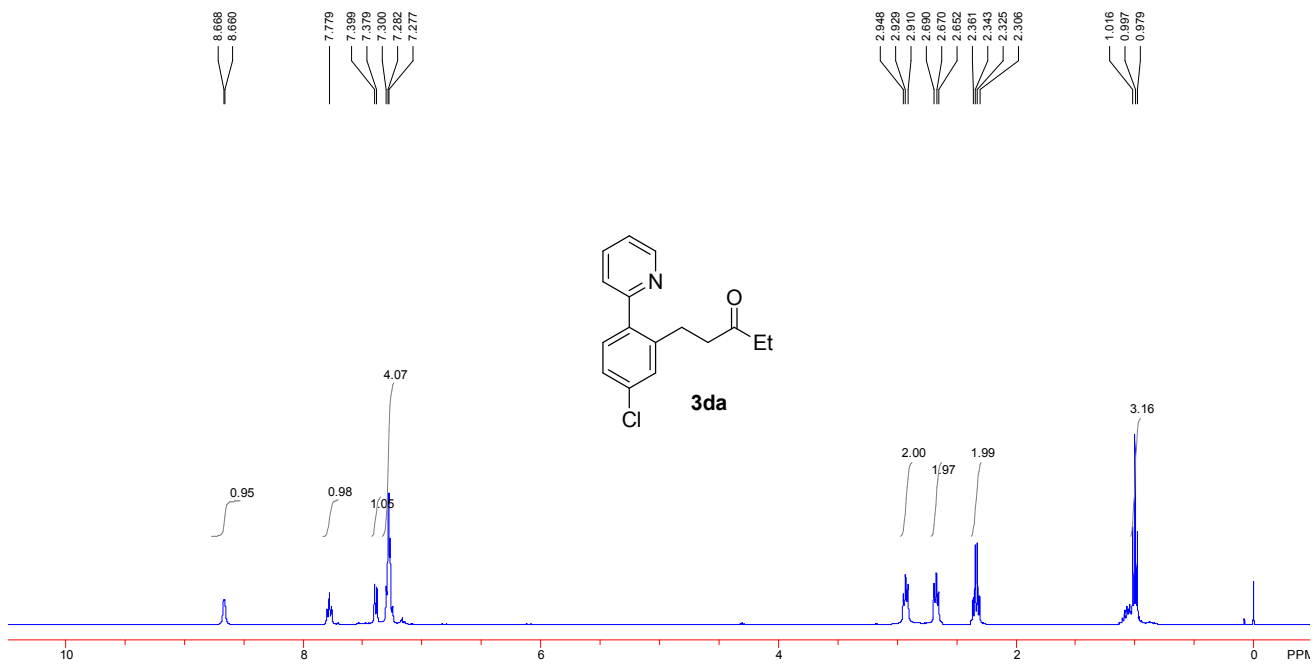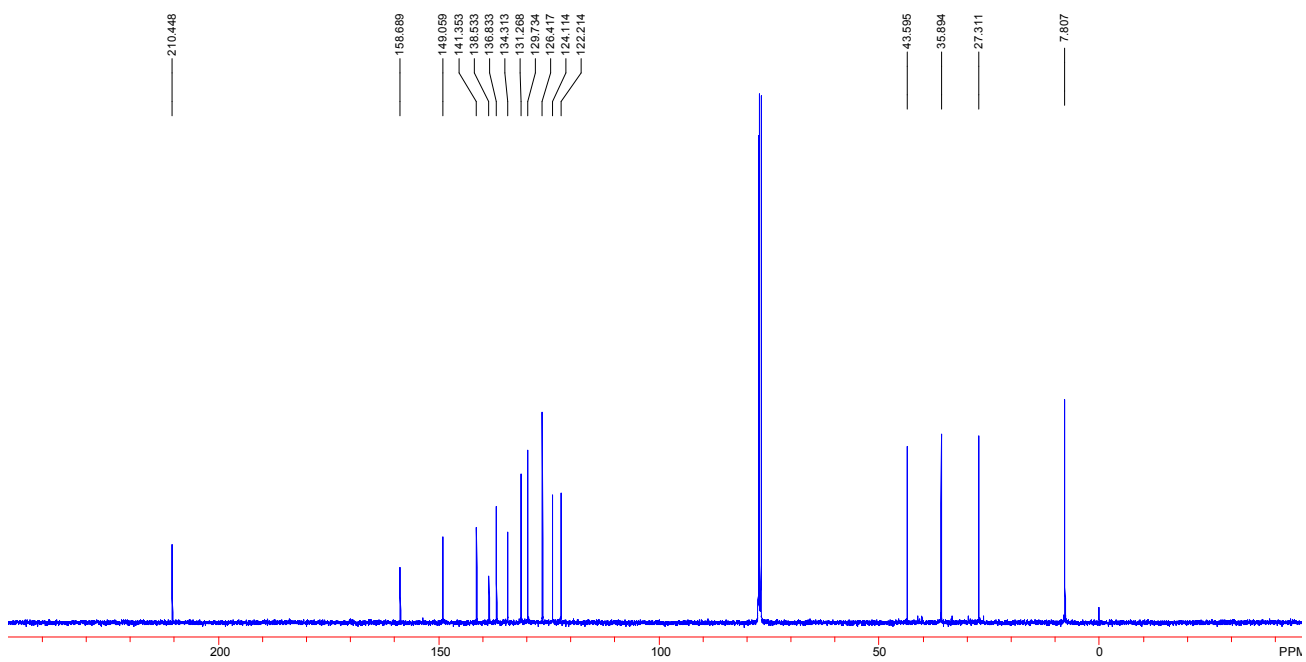

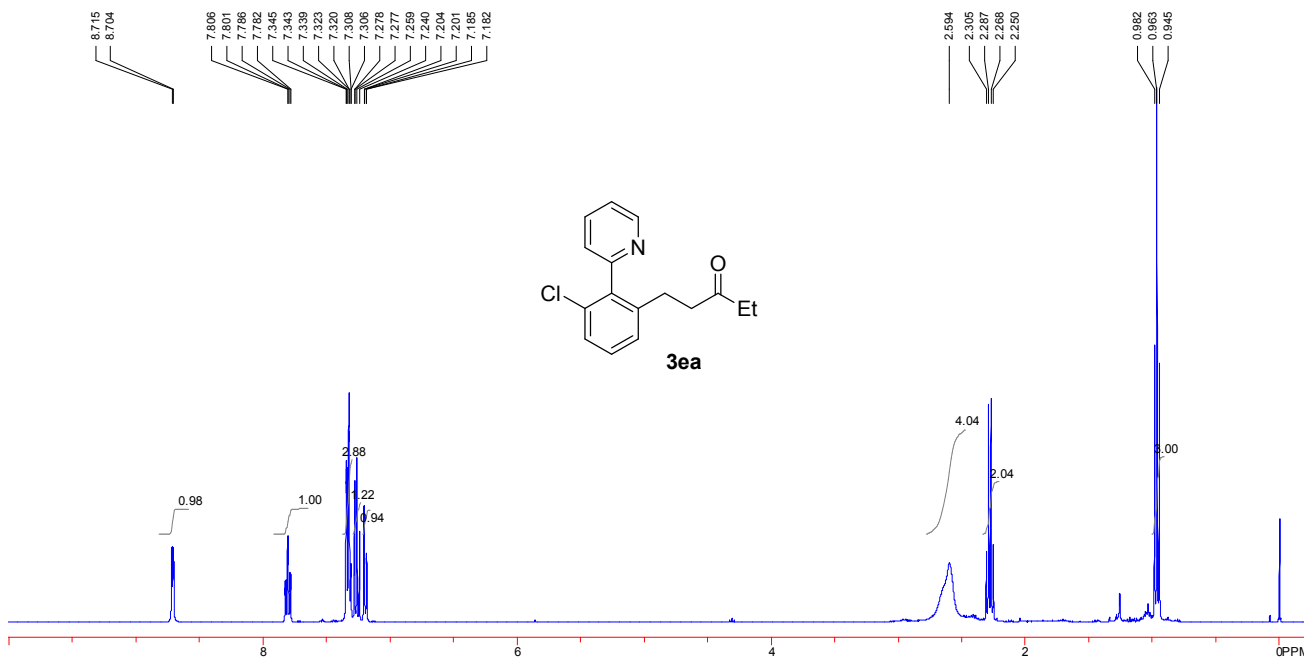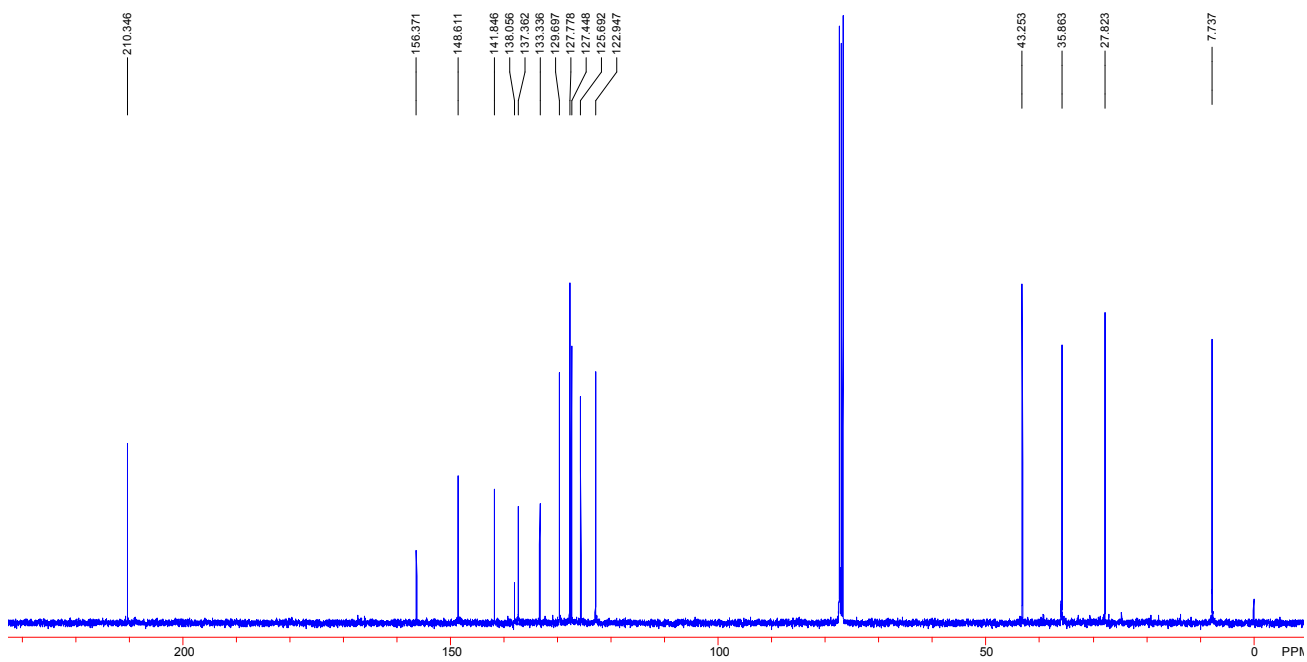

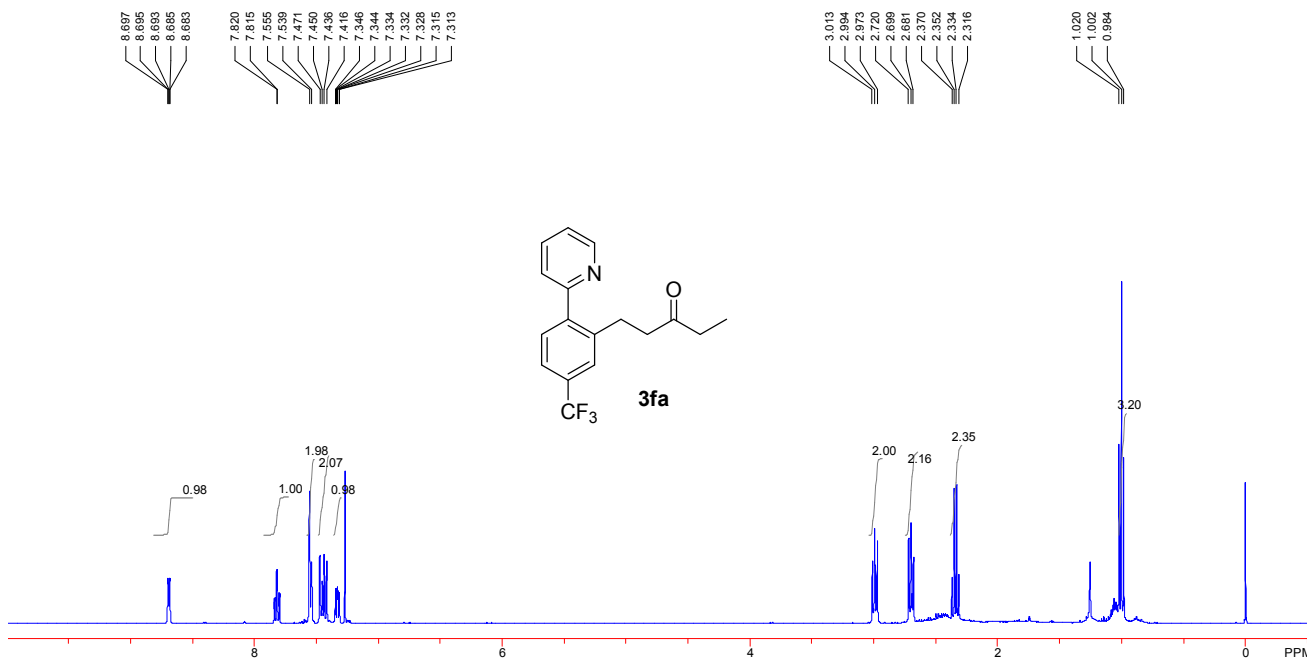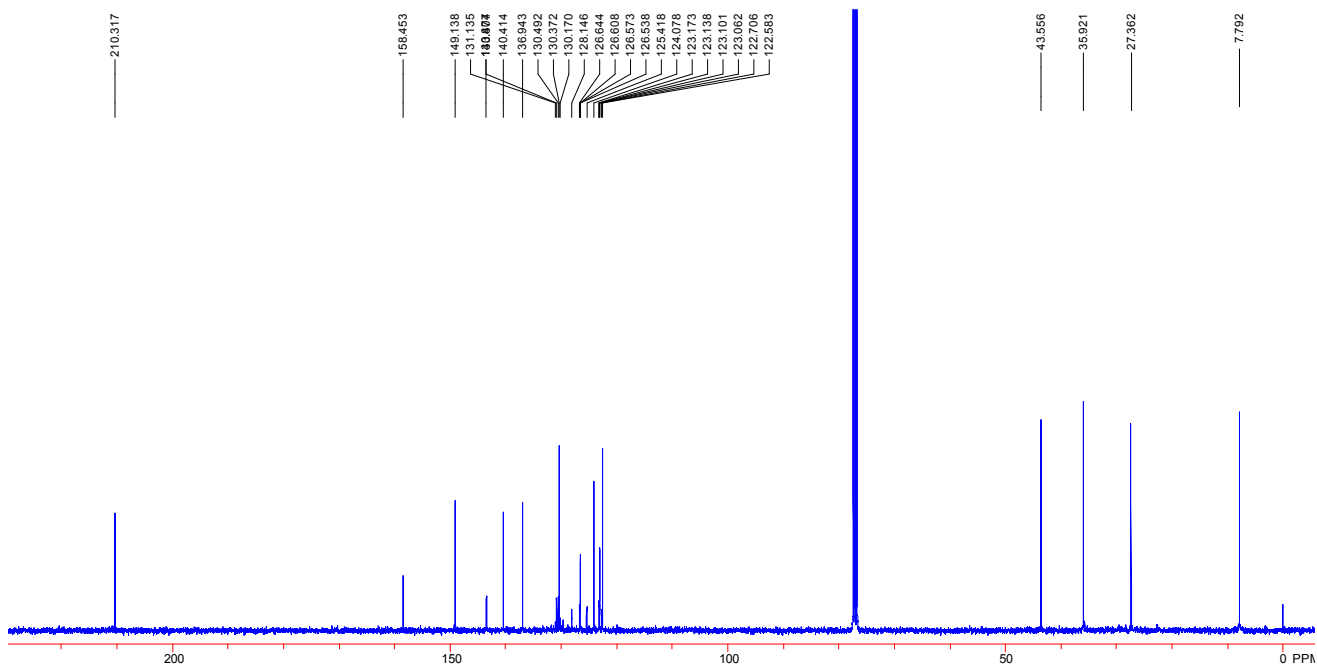

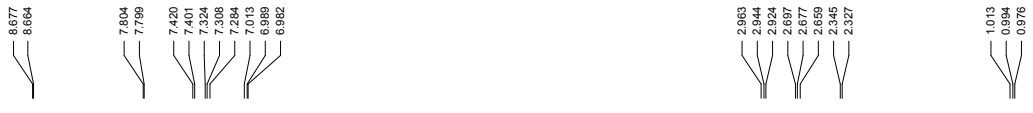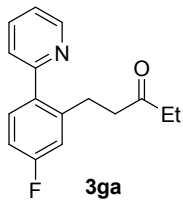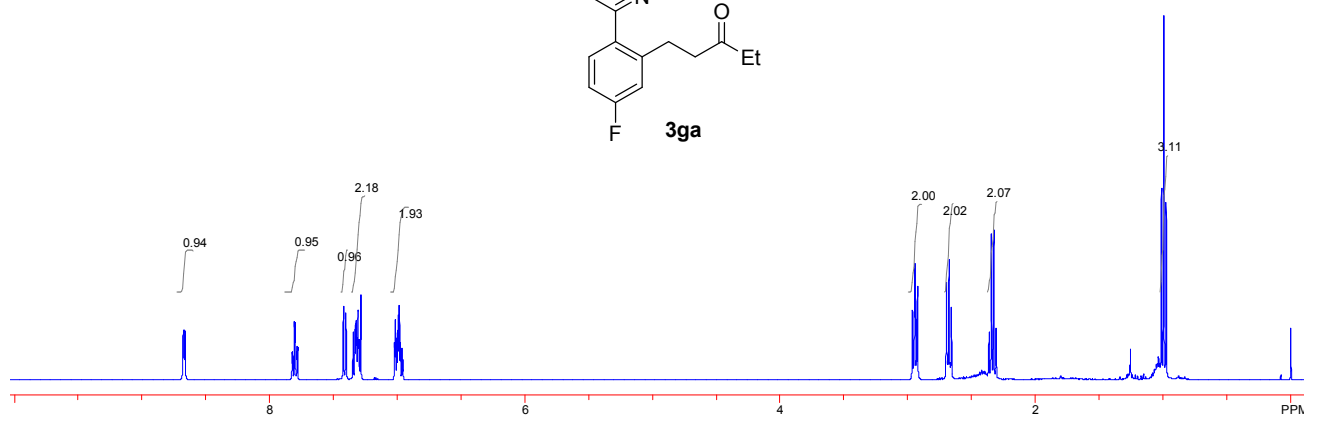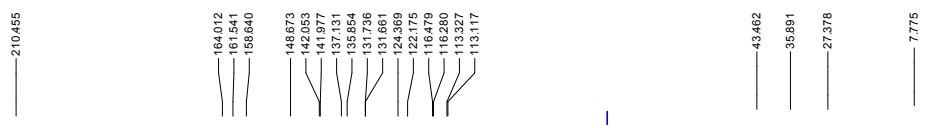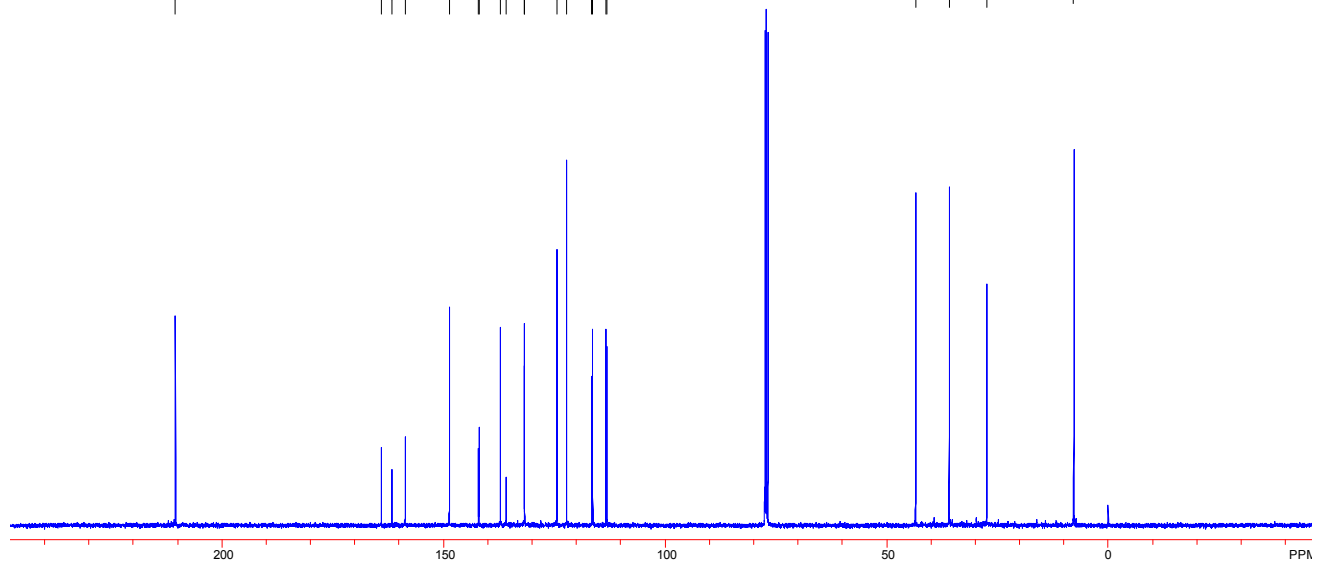

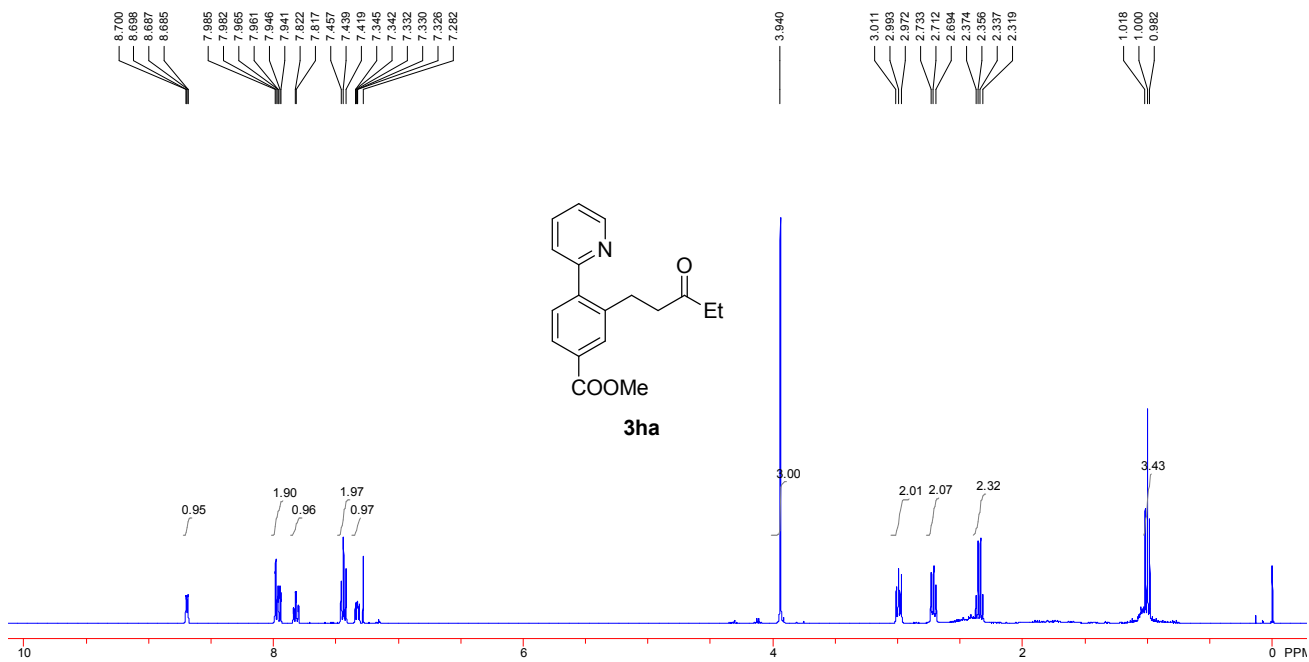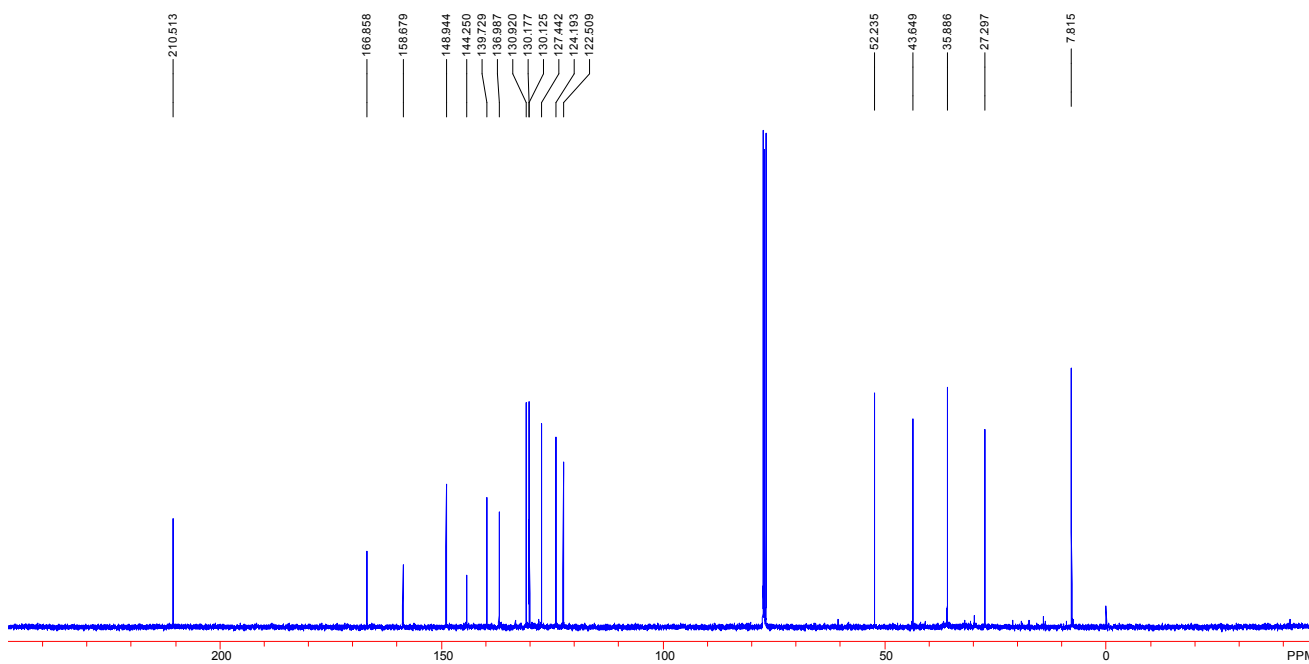

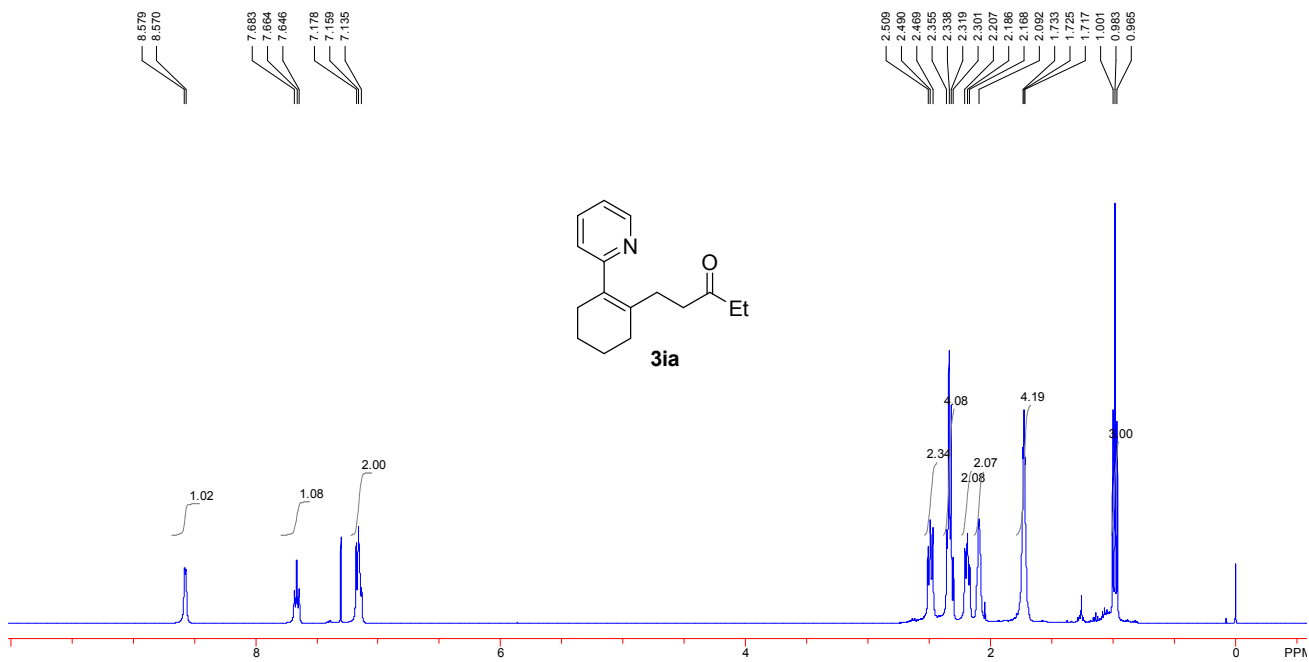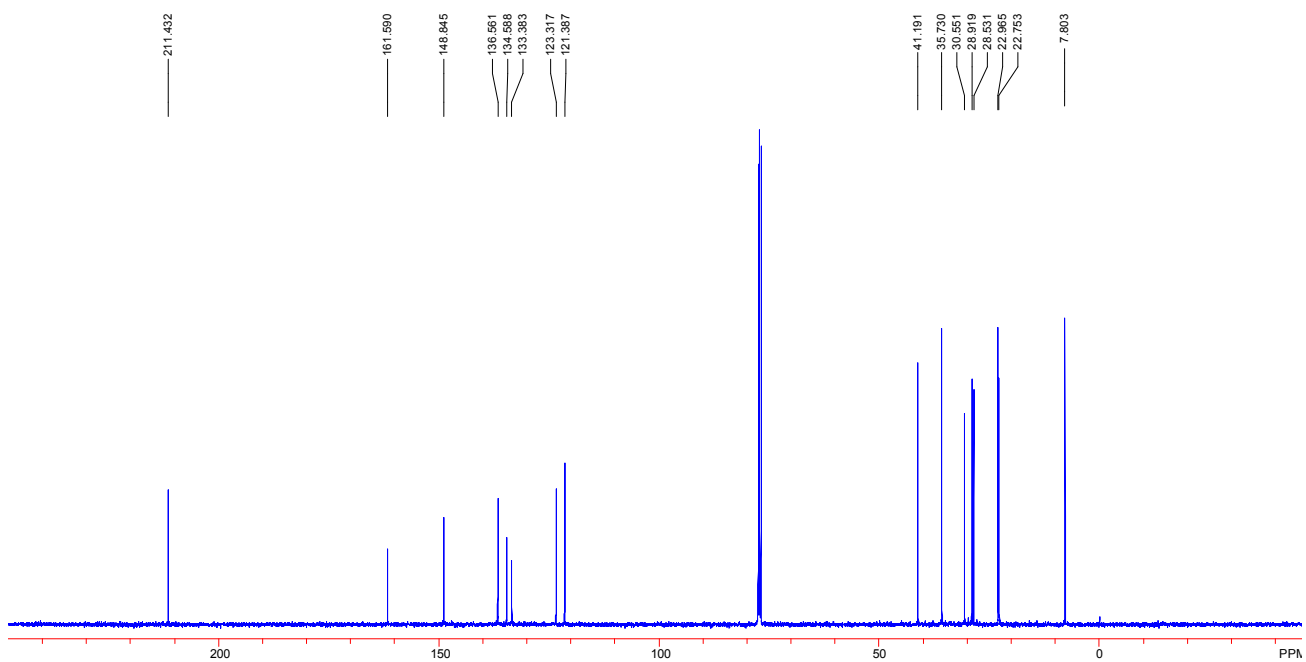

8.585  
8.584

7.710  
7.708  
7.681  
7.687  
7.671  
7.667  
7.195  
7.176  
7.158

2.524  
2.506  
2.482  
2.465  
2.398  
2.388  
2.361  
2.342  
2.324  
2.306  
2.288  
2.164  
2.131  
2.101  
1.817  
1.784  
1.749  
1.387  
1.335  
1.305  
1.024  
1.009  
1.005  
0.988

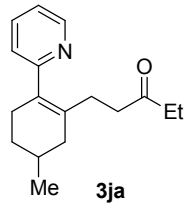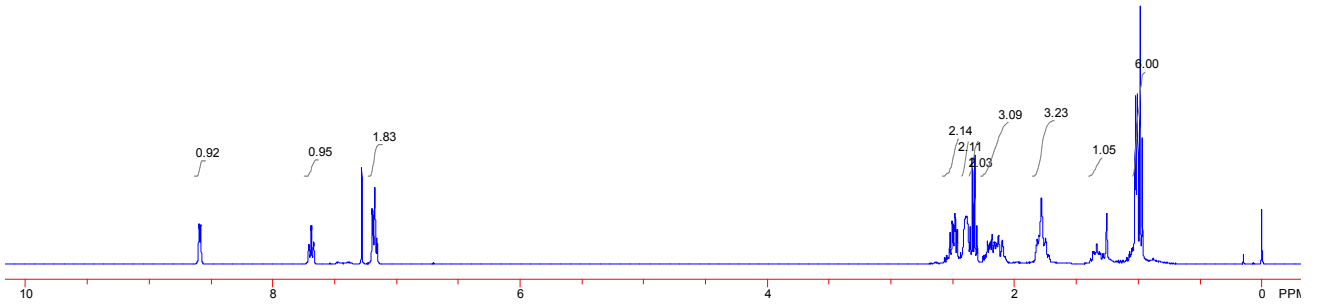

211.427

161.282

148.564

136.910

134.477

132.642

123.543

121.500

41.085

37.616

35.751

31.159

30.796

28.707

28.422

21.805

7.819

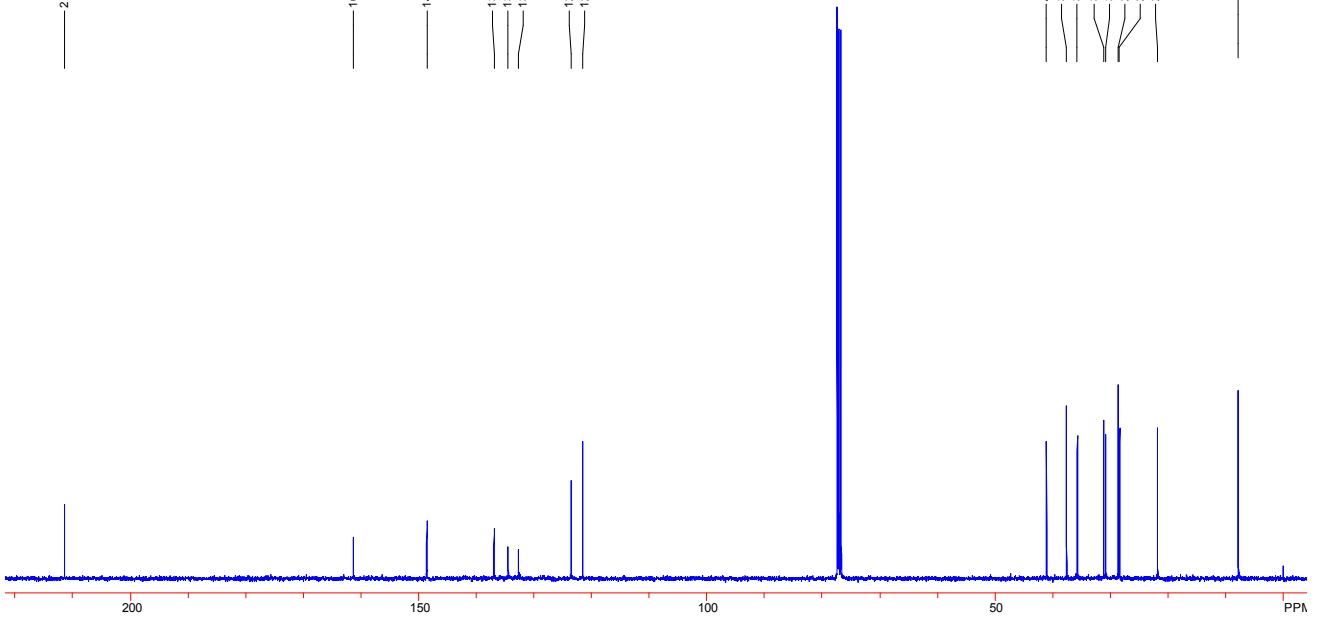



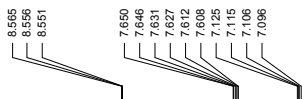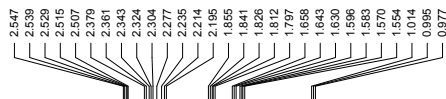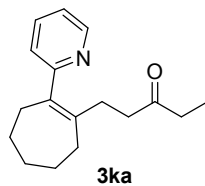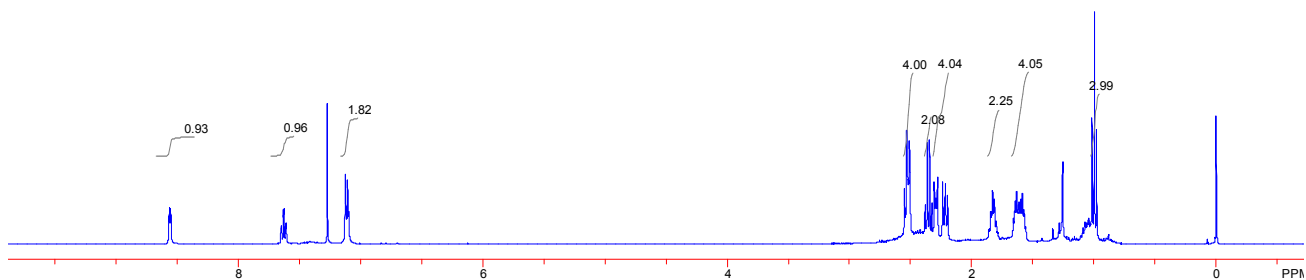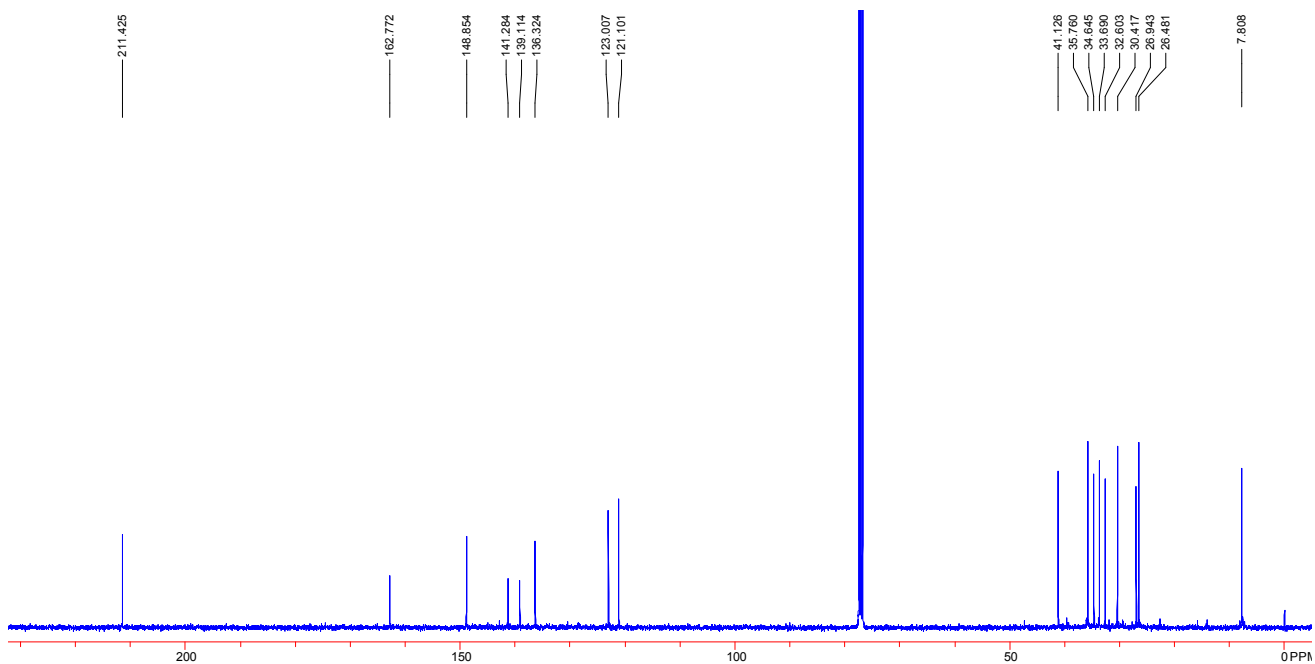

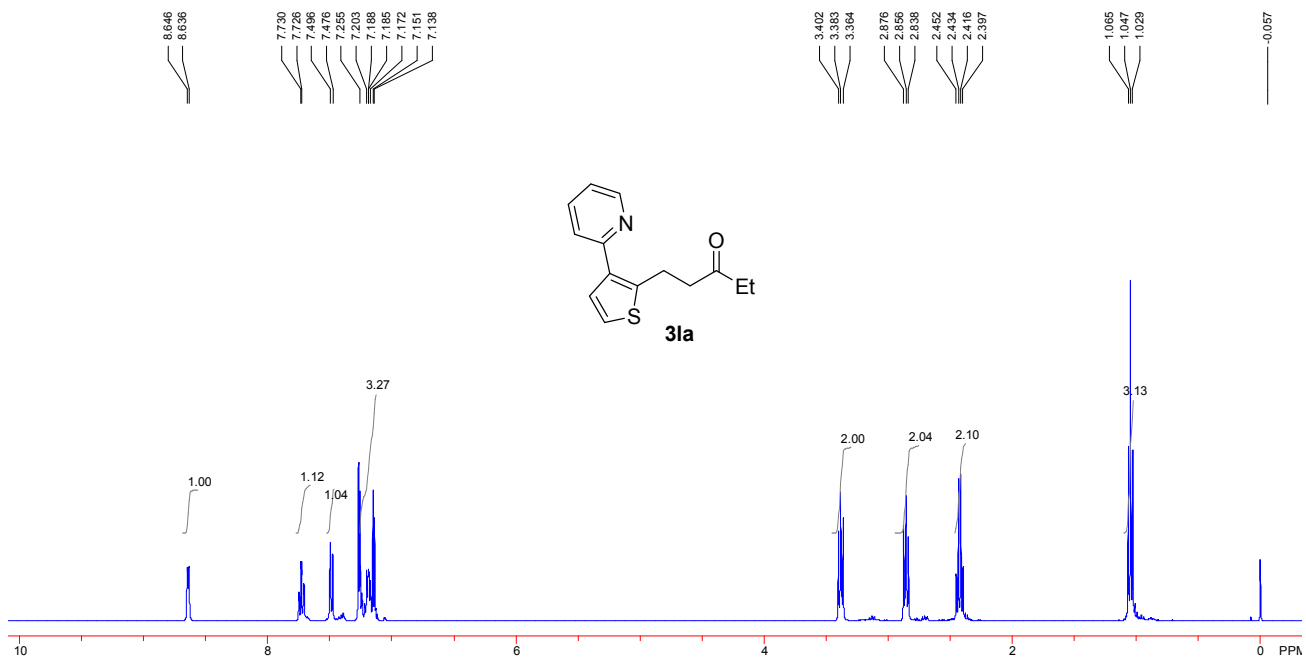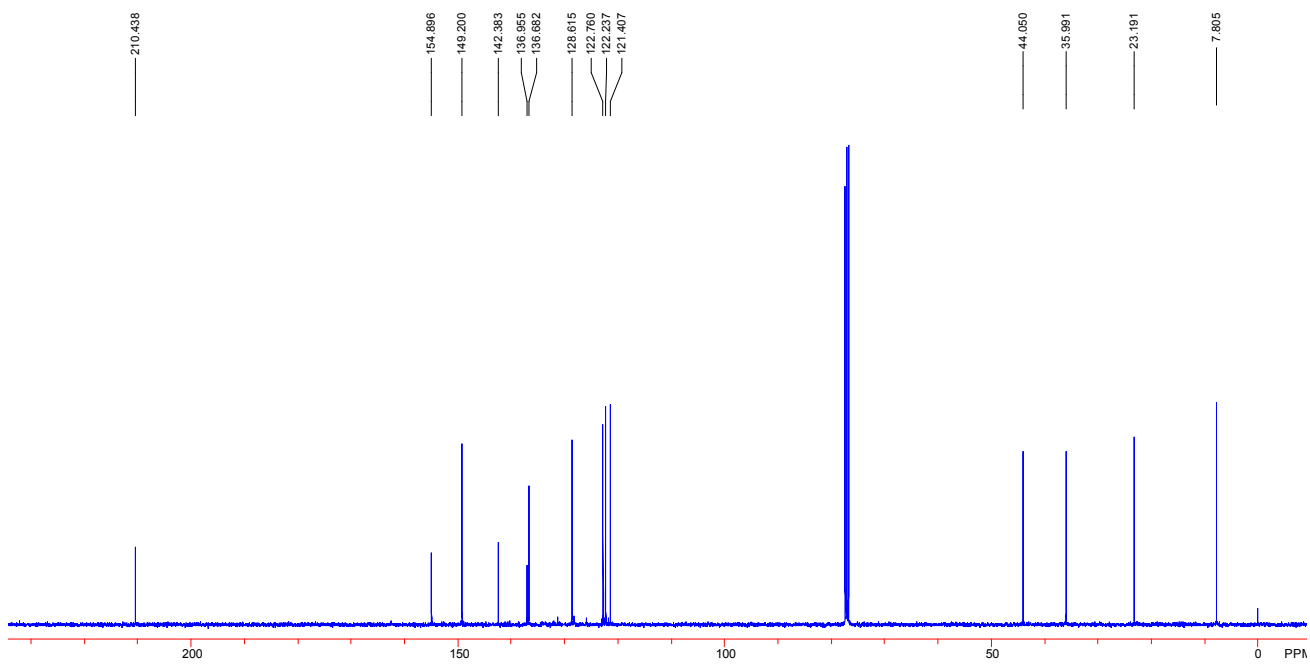

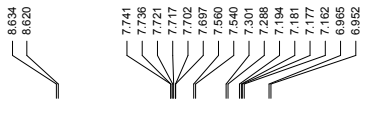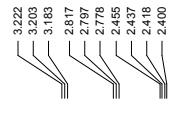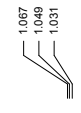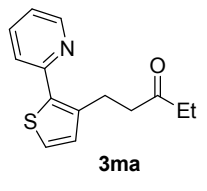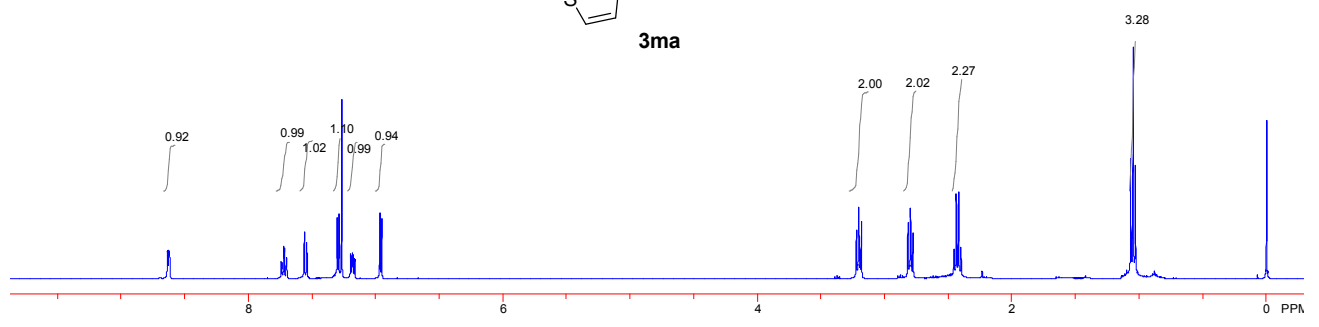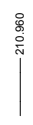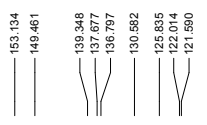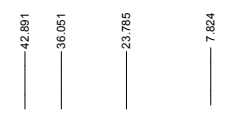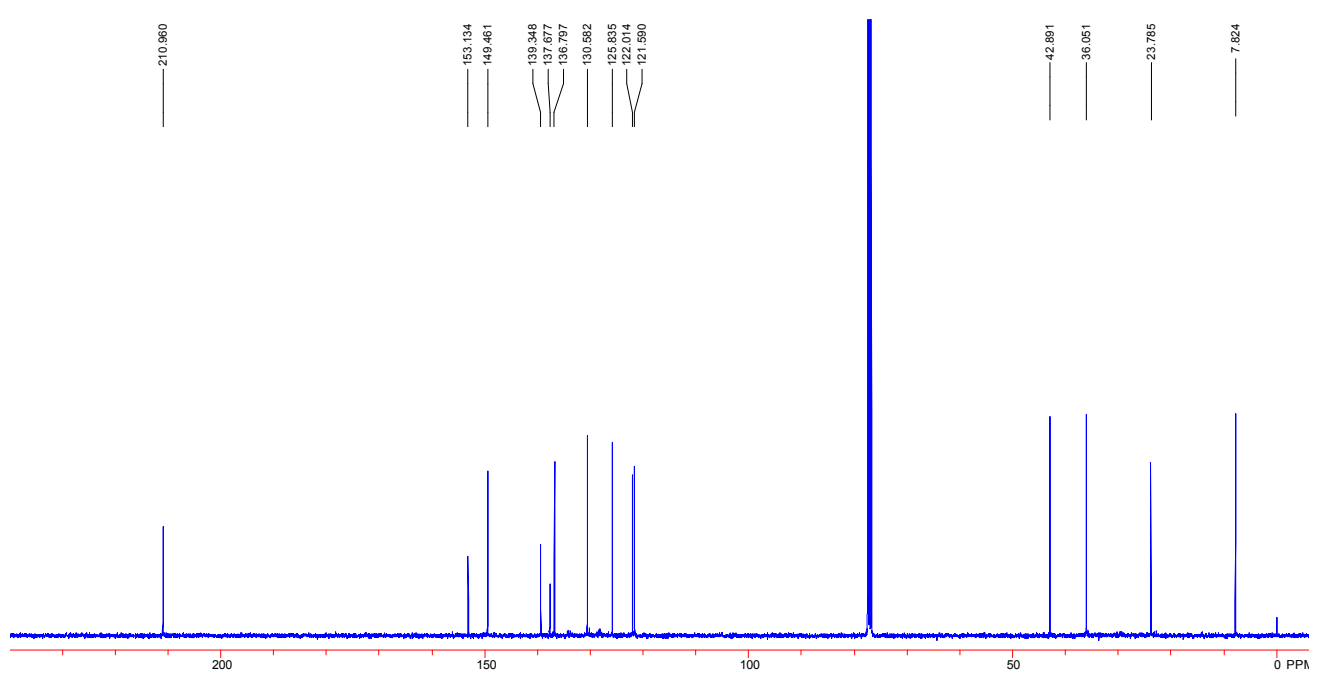

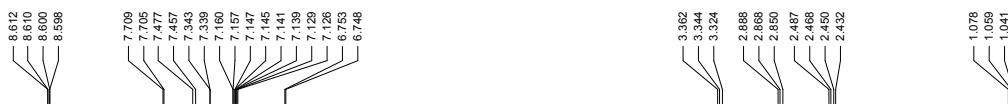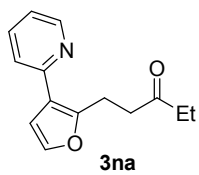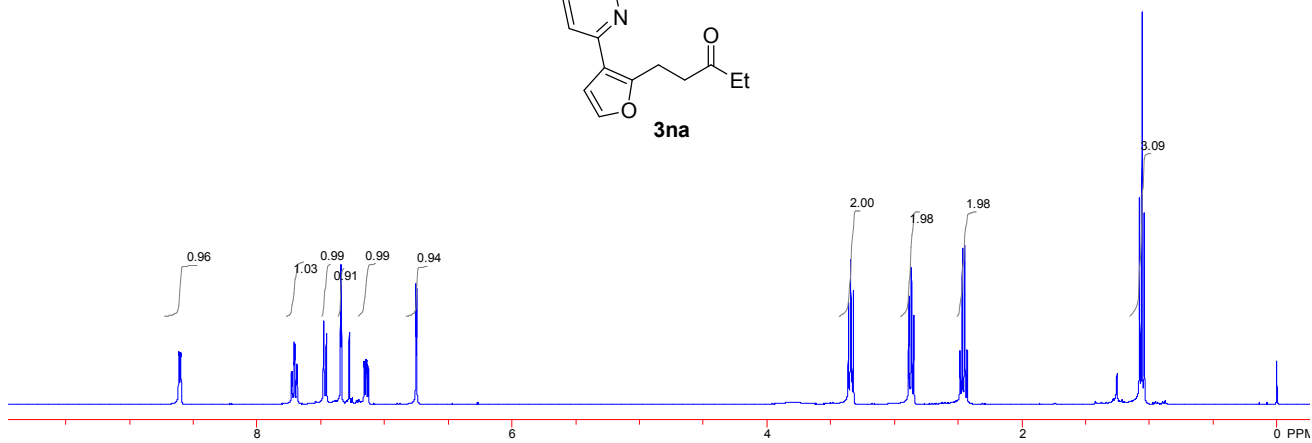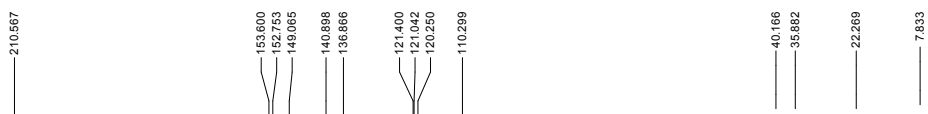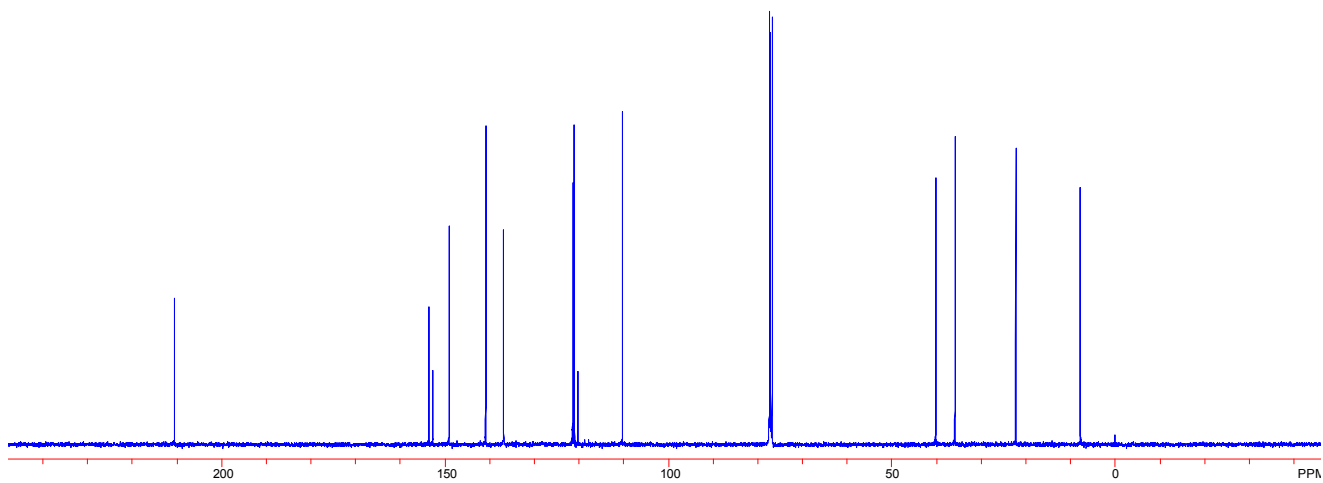

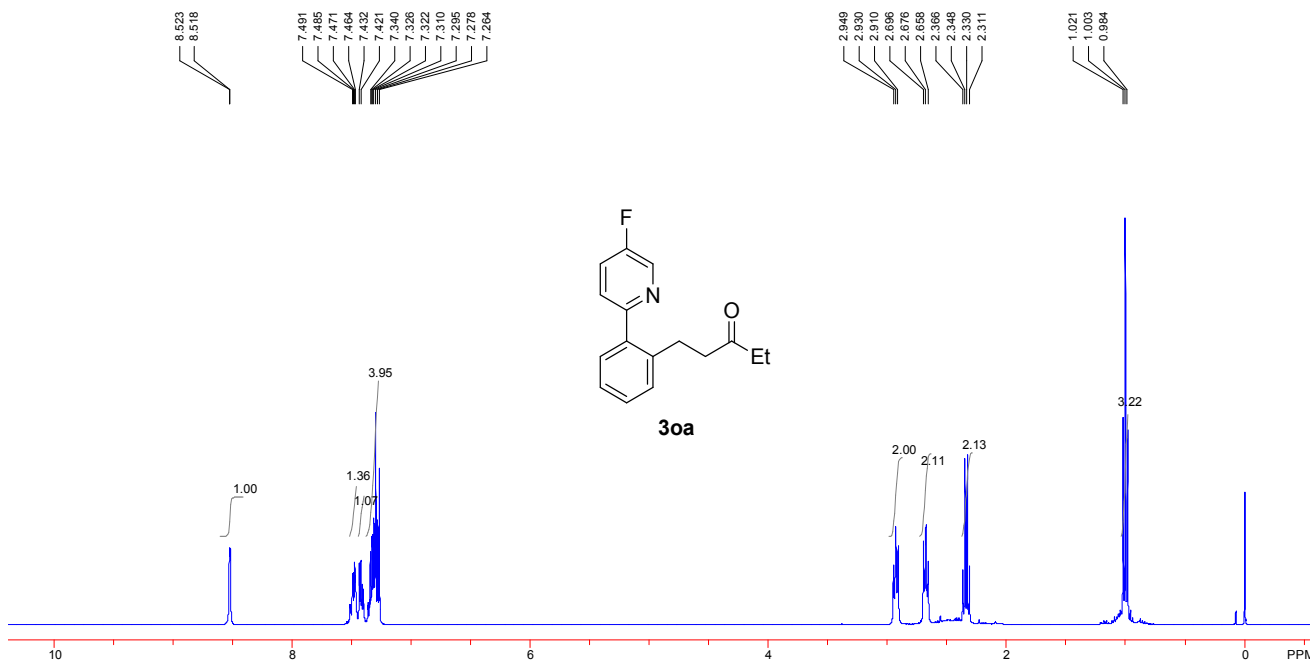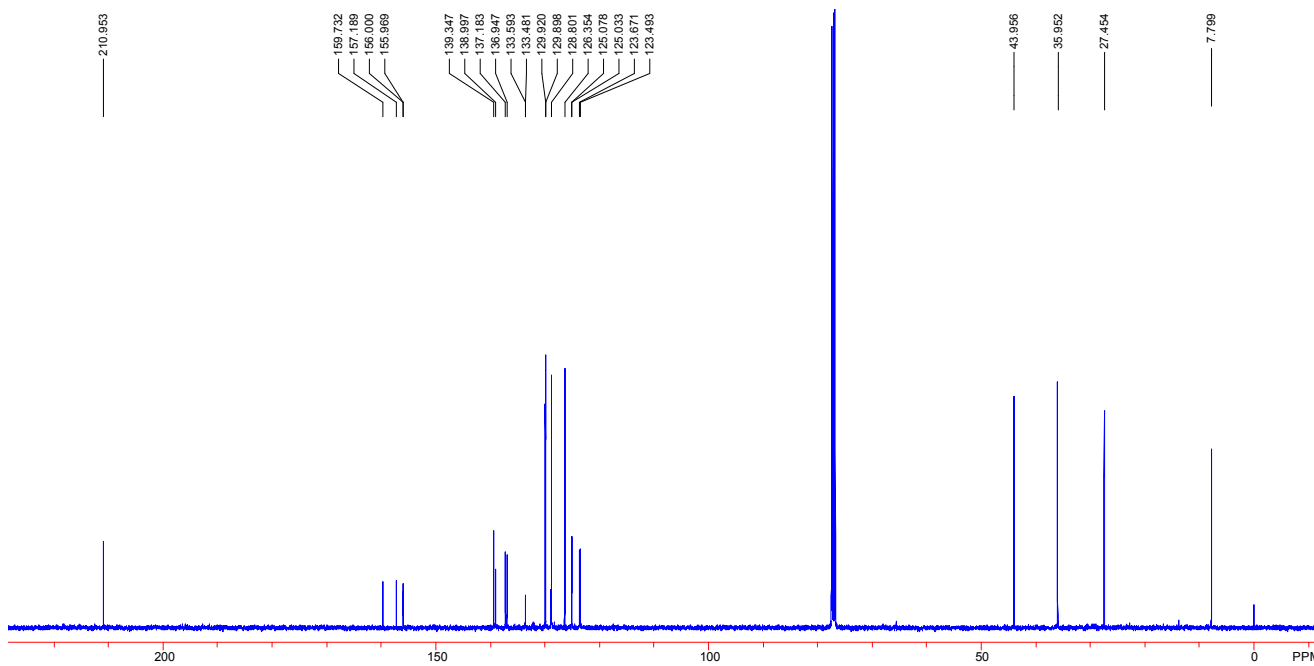

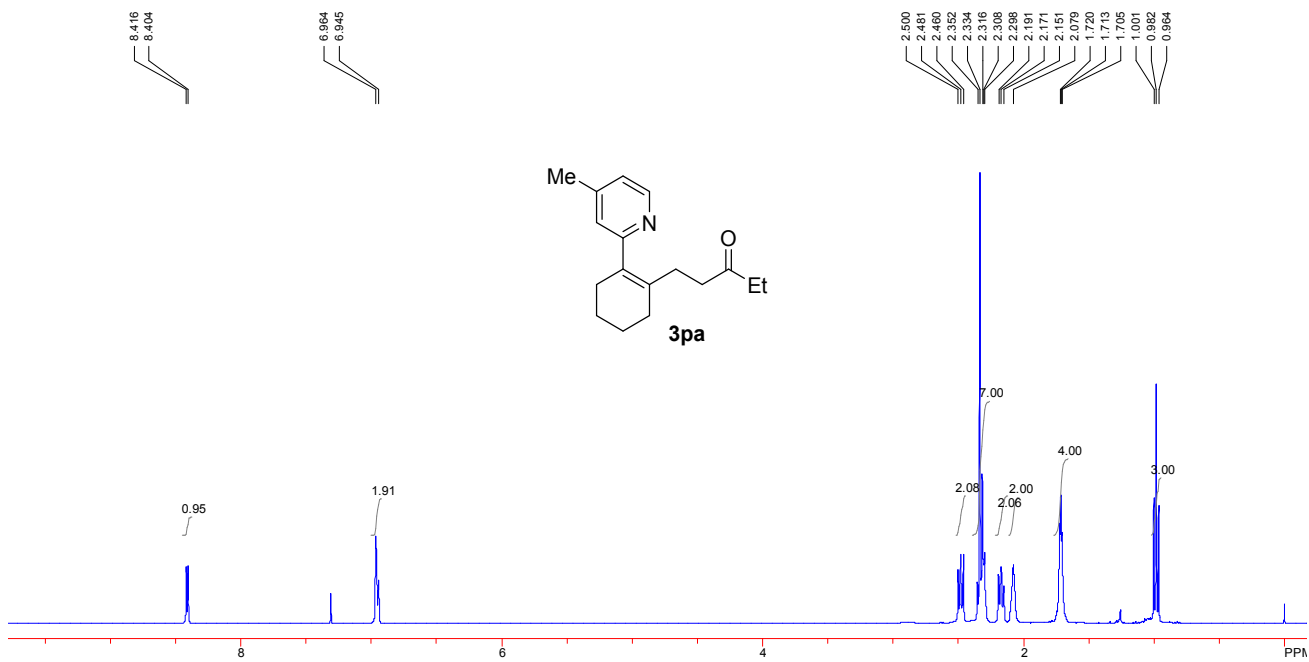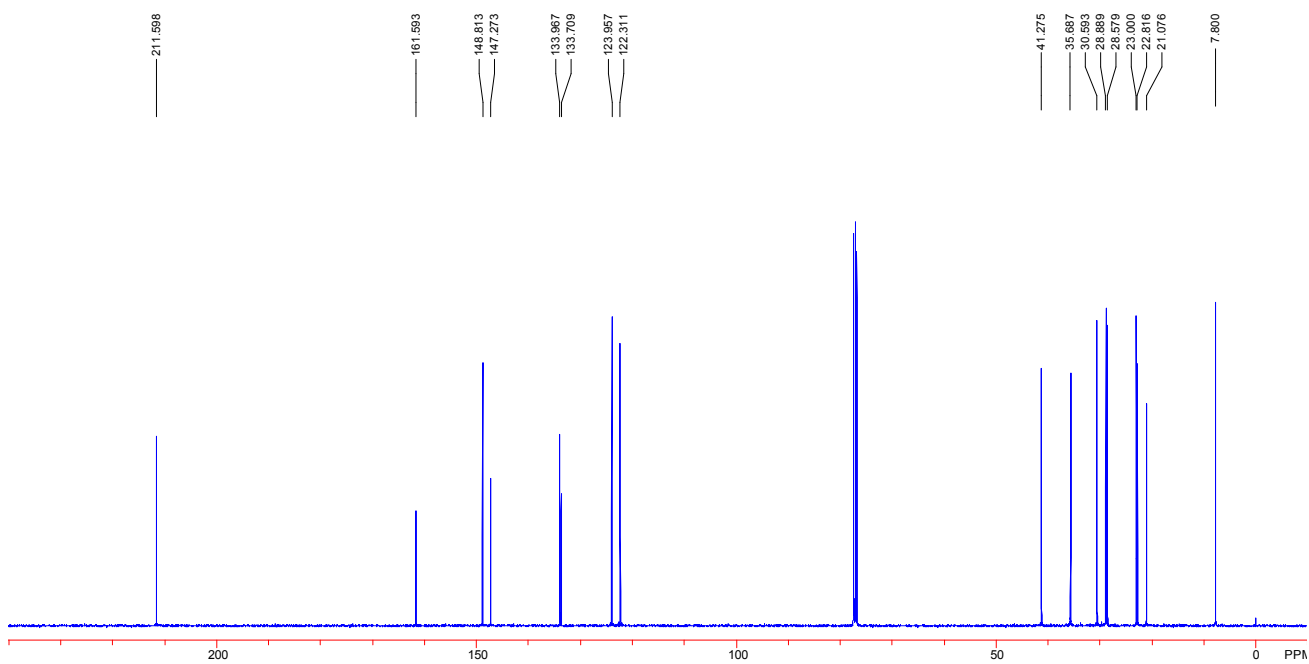

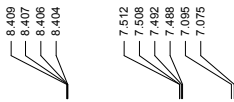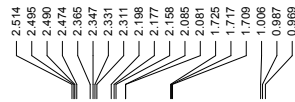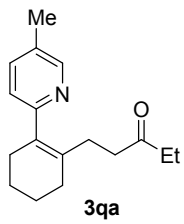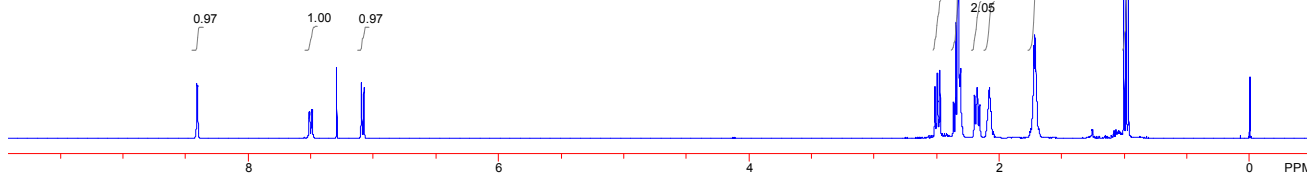

211.530

158.424

148.722

137.603

134.736

132.637

130.953

122.958

41.173

35.766

30.635

28.926

28.555

22.993

22.758

18.176

7.815

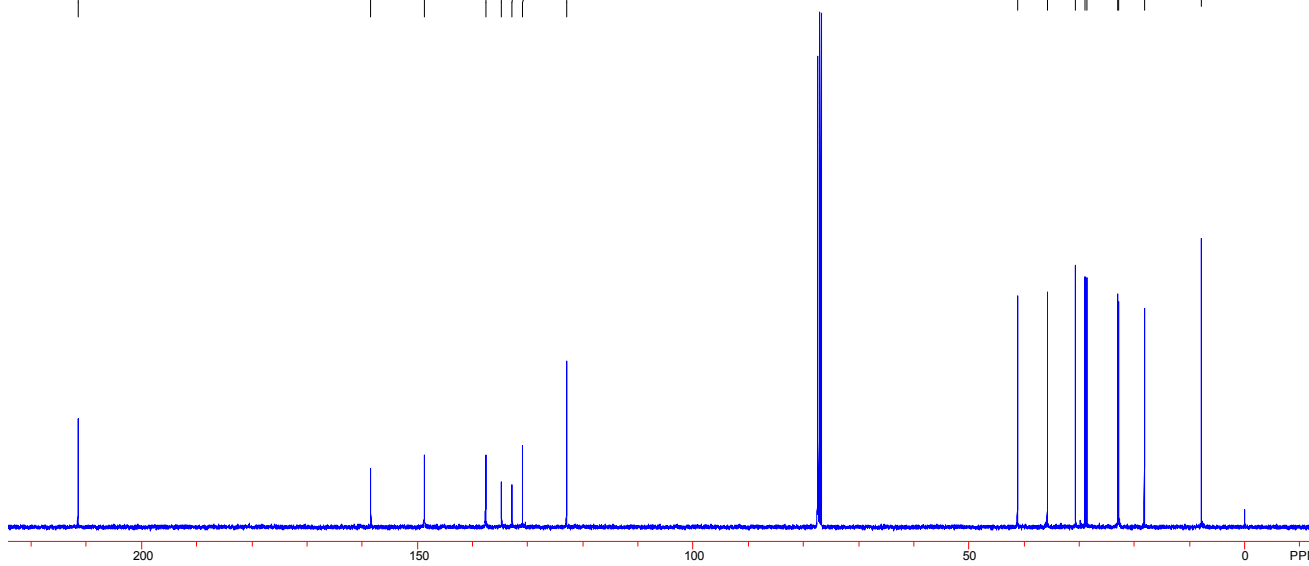

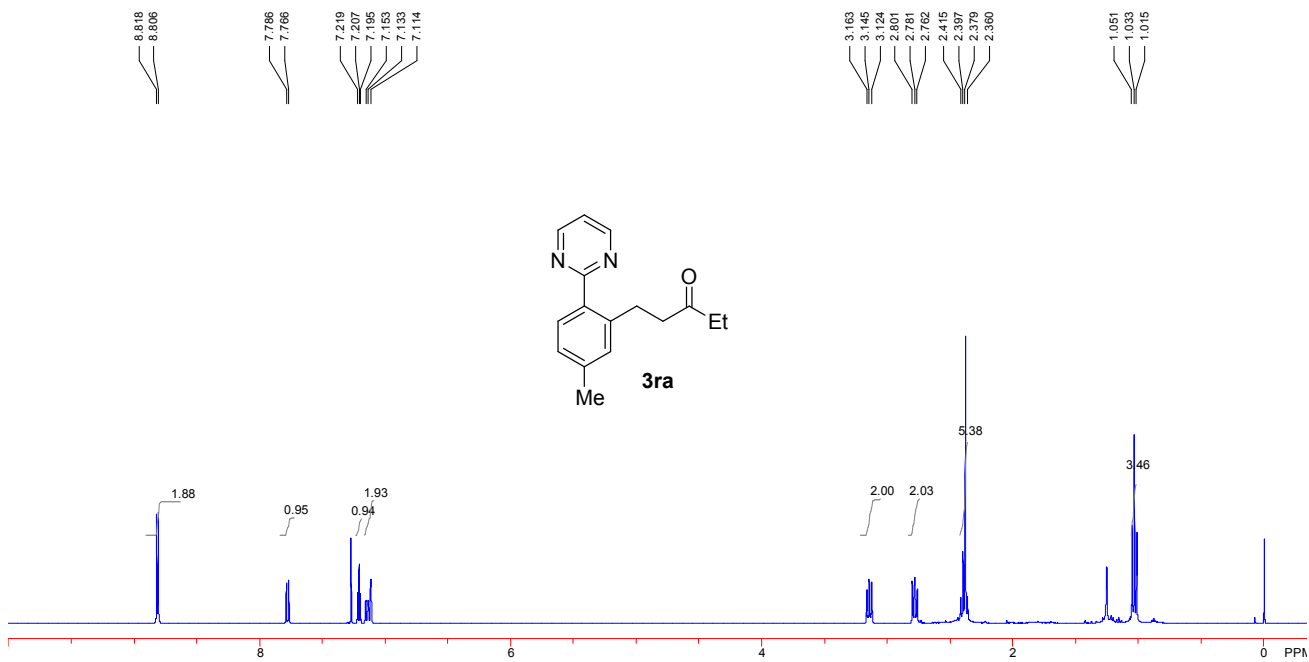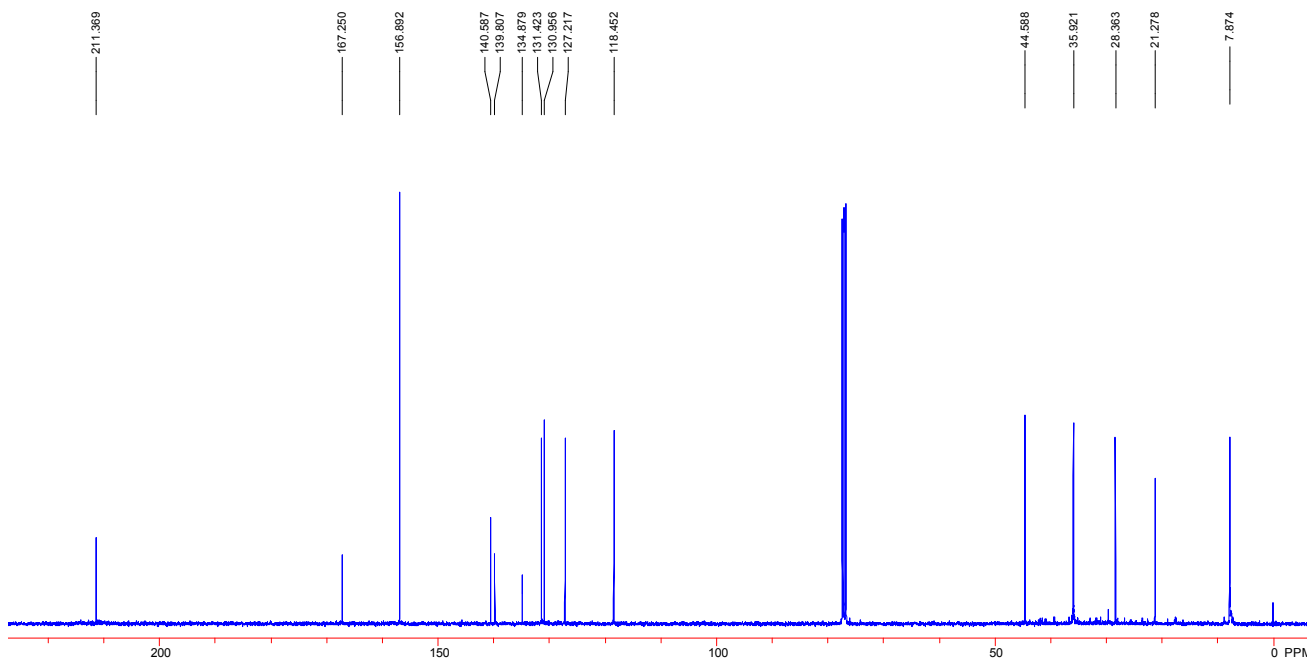



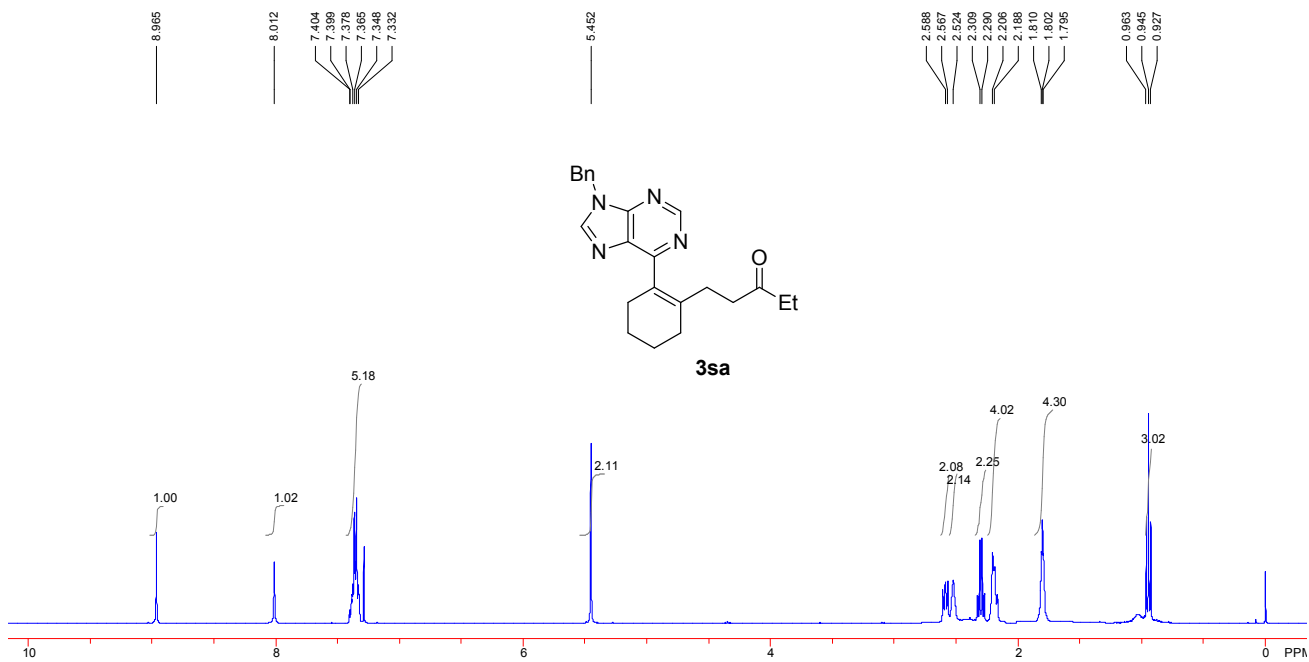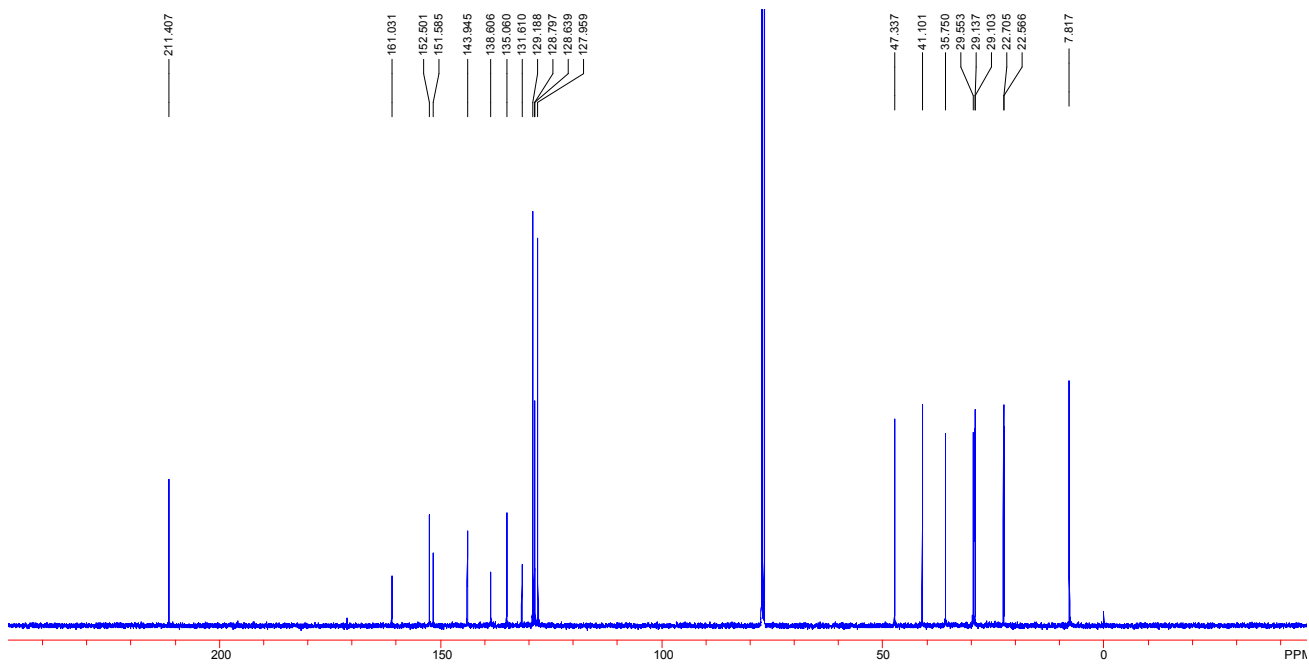

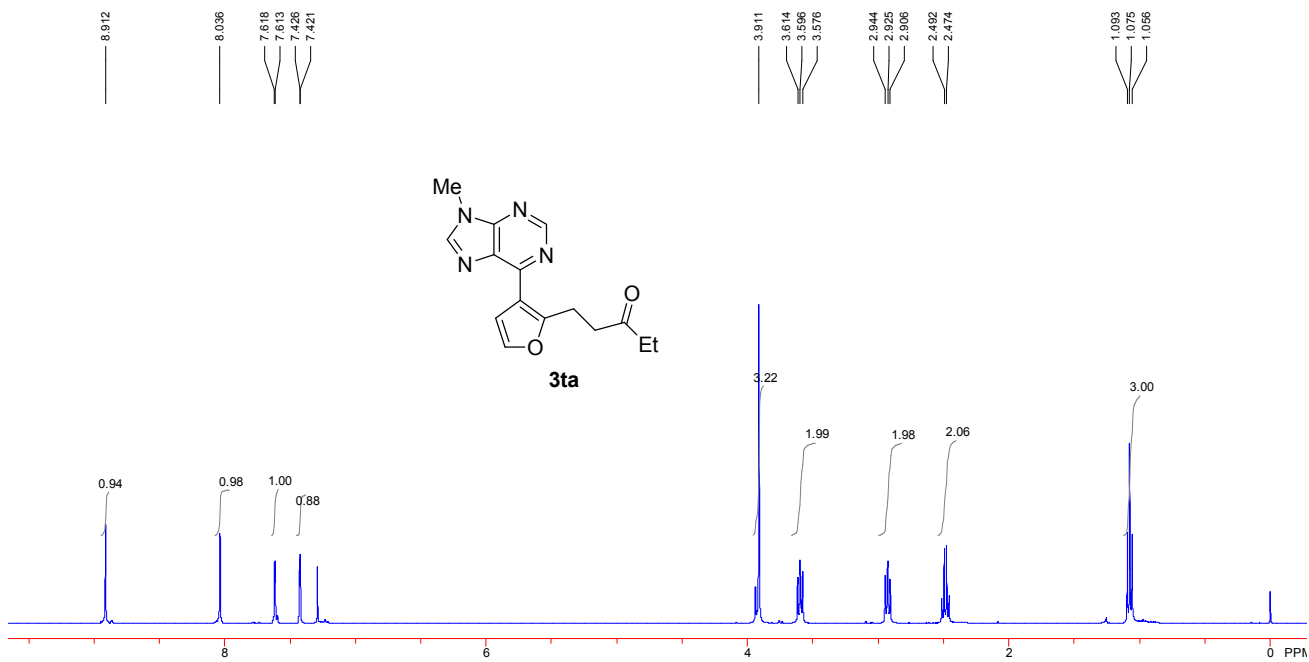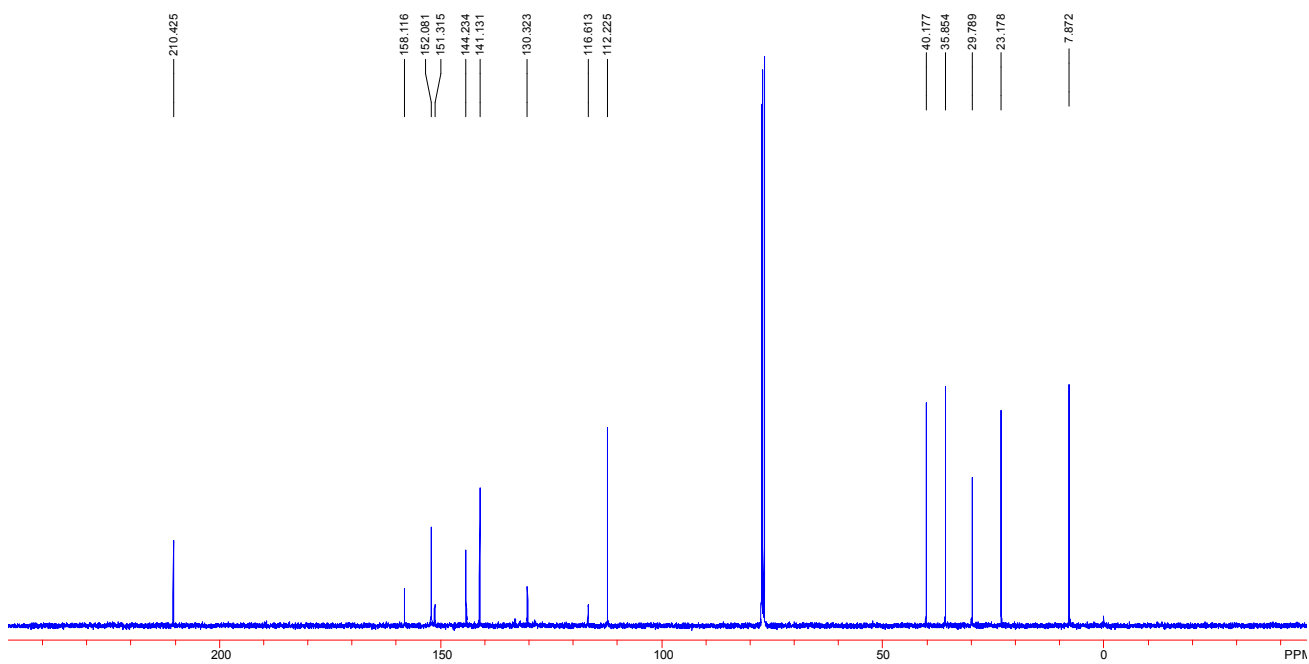

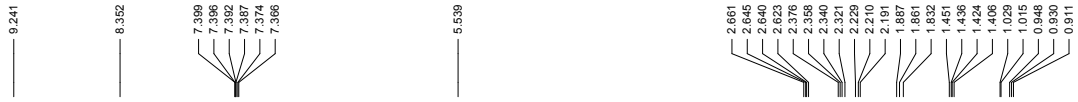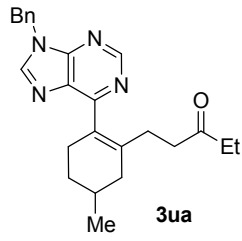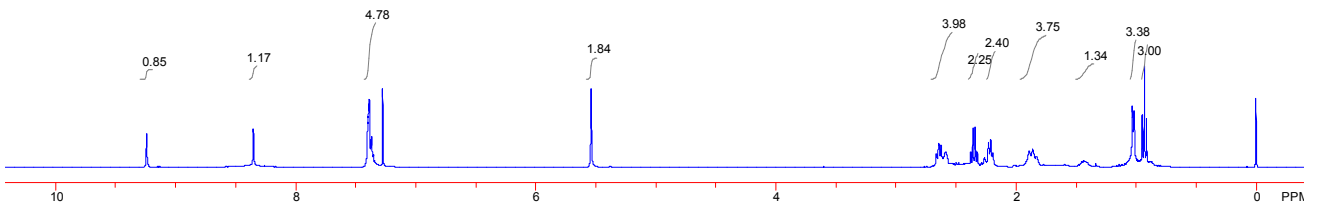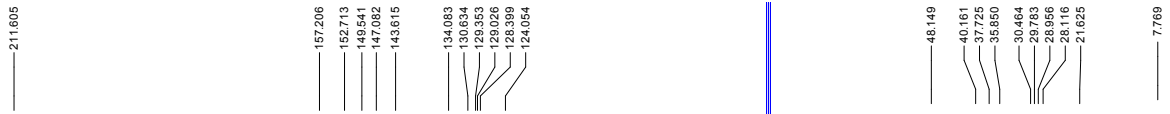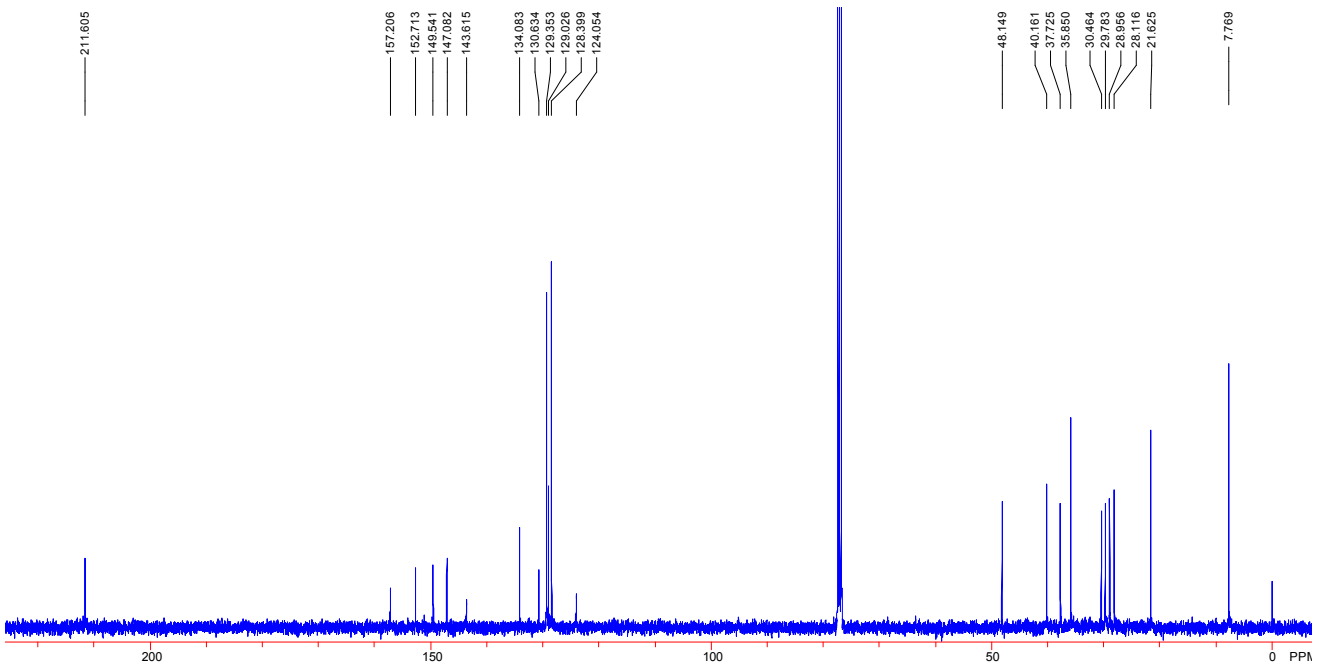

8.691  
8.690  
8.679

7.802  
7.796

7.447  
7.427  
7.314  
7.301  
7.300  
7.172  
7.163

2.833  
2.914  
2.889  
2.651  
2.631  
2.612  
2.377  
2.355  
2.337  
2.316  
2.300  
2.281

0.995  
0.976  
0.958

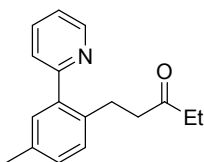

**85**

**3va**

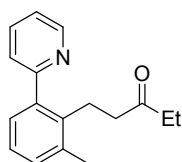

**15**

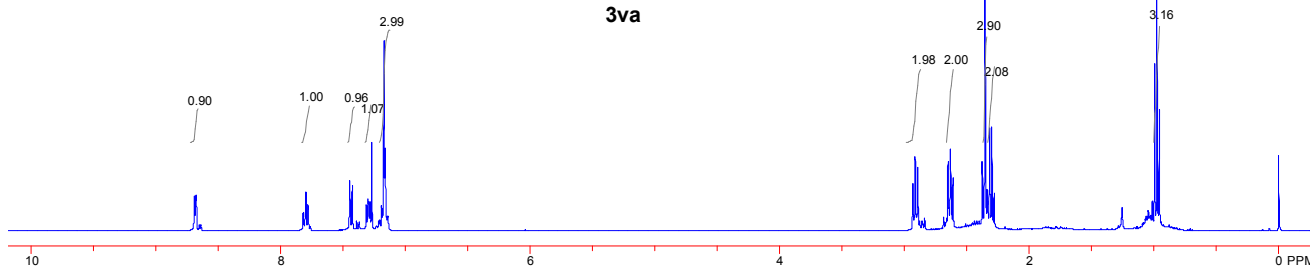

211.137

159.564

148.509

139.379

137.066

136.099

135.908

130.629

129.725

129.541

124.370

122.012

44.022

35.910

27.062

20.954

7.801

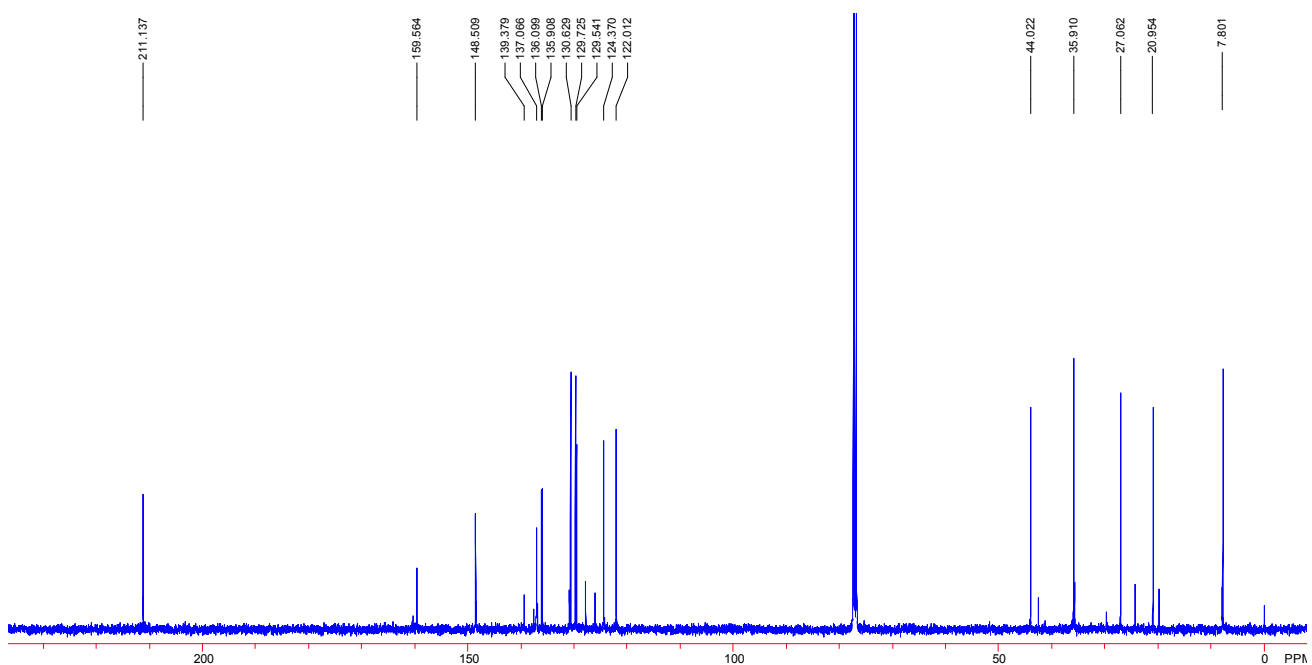

10.013

8.7719  
8.7707

7.872  
7.865  
7.852  
7.505  
7.495  
7.488  
7.476  
7.380  
7.364  
7.361  
7.349

3.056  
3.038  
3.018  
2.735  
2.715  
2.696  
2.371  
2.353  
2.335  
2.316

1.013  
0.994  
0.976

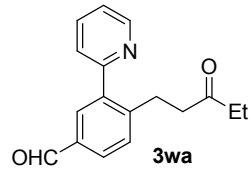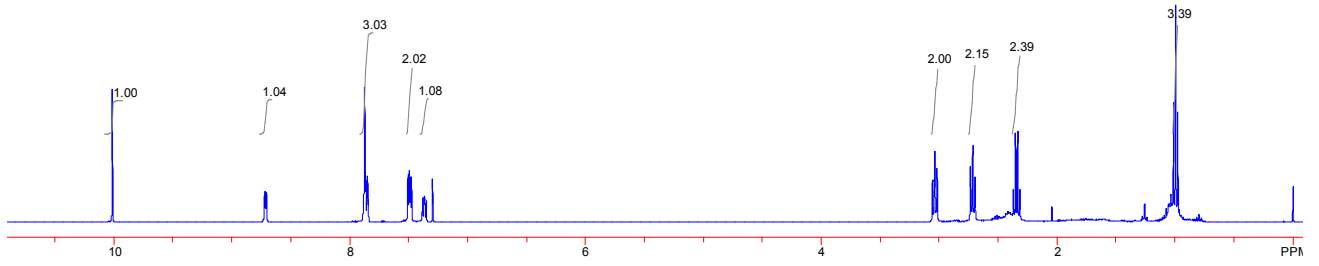

210.213

191.668

158.176  
148.842  
146.867  
140.542  
137.385  
134.676  
131.482  
130.735  
129.618  
124.330  
122.676

43.247

35.897

27.665

7.776

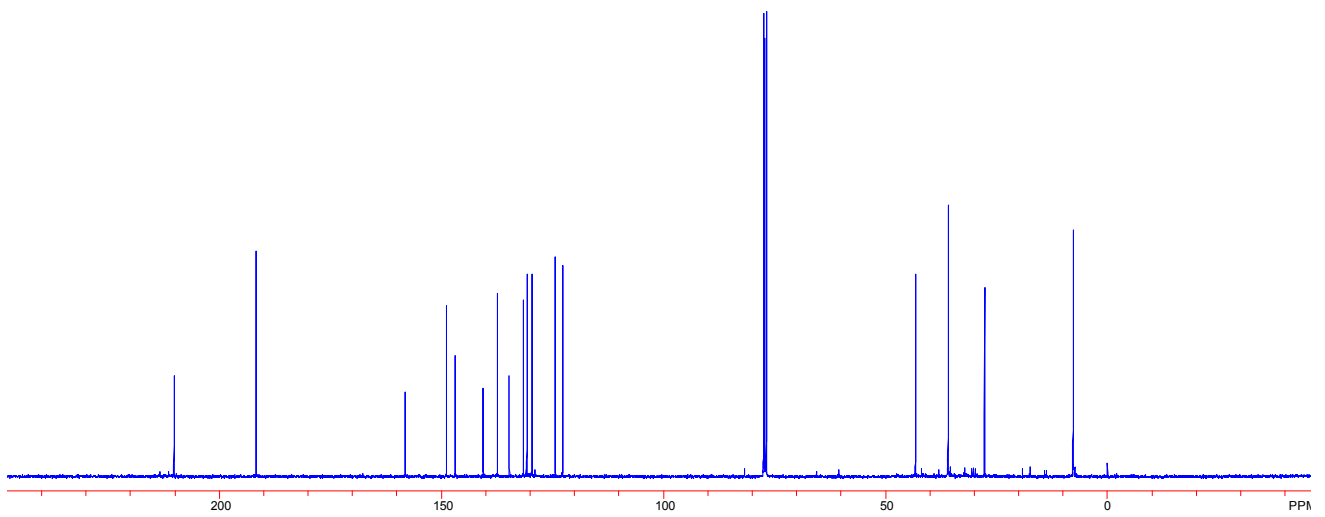

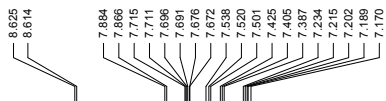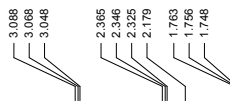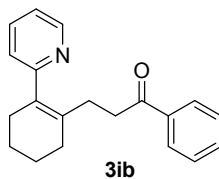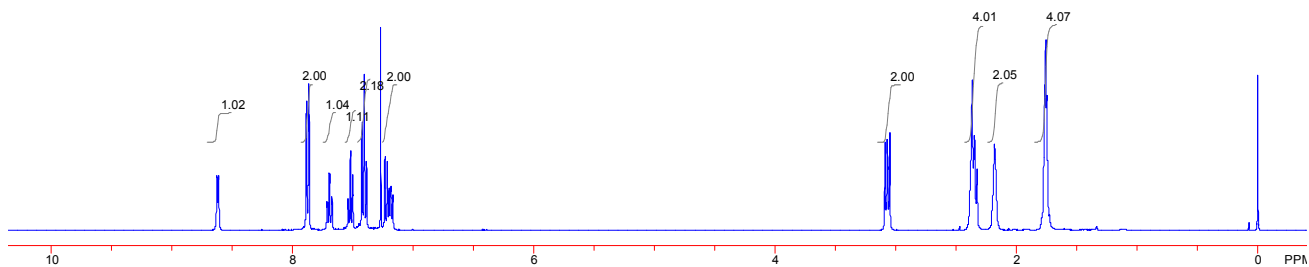

200.098

161.156

148.290

137.380

136.652

135.446

132.931

128.494

128.119

123.708

121.642

37.630

30.634

29.257

29.020

22.931

22.715

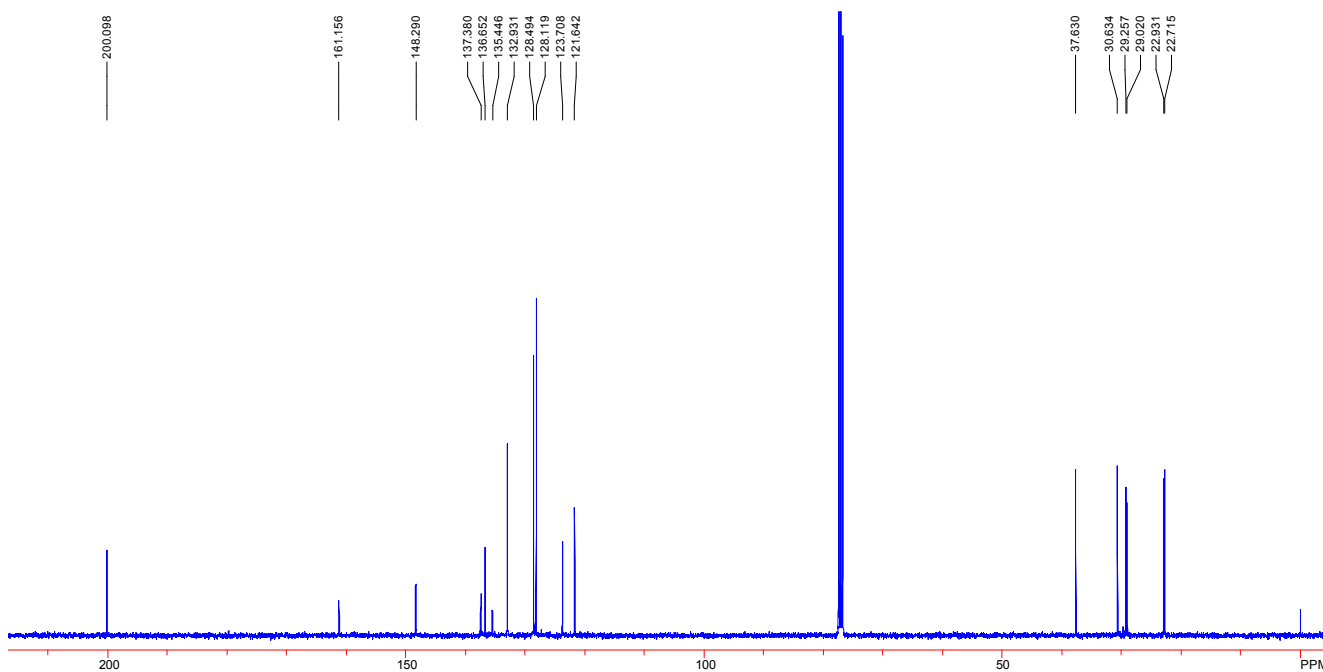

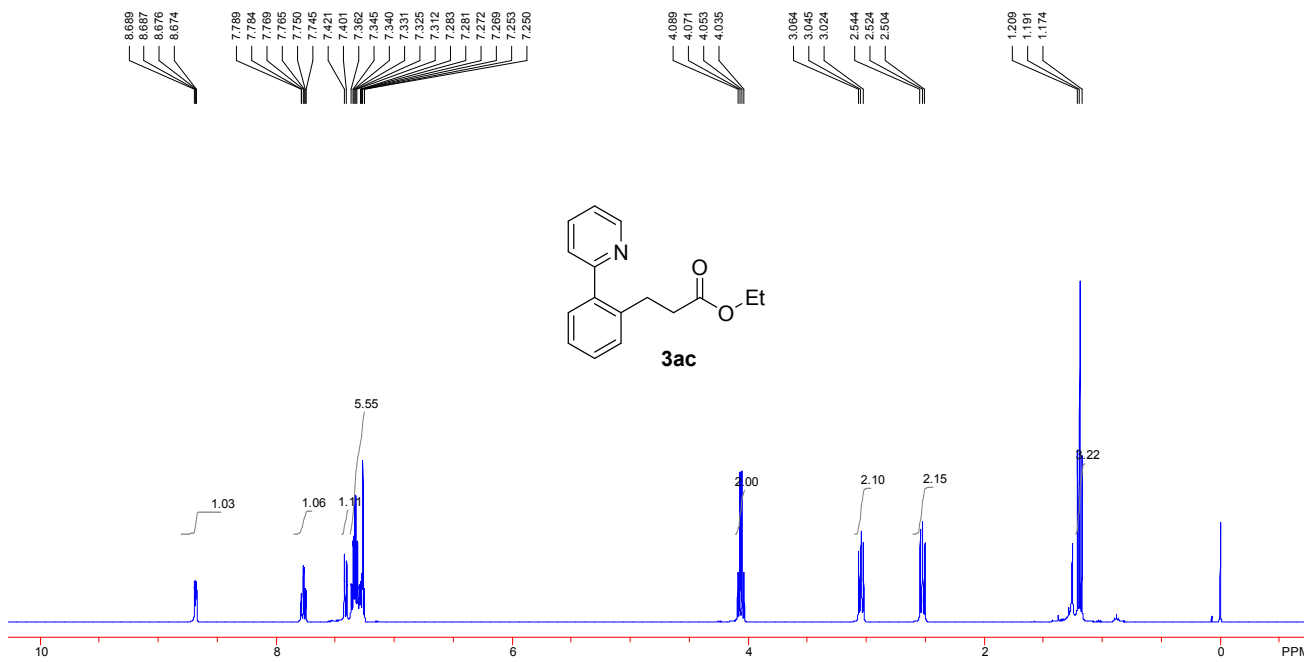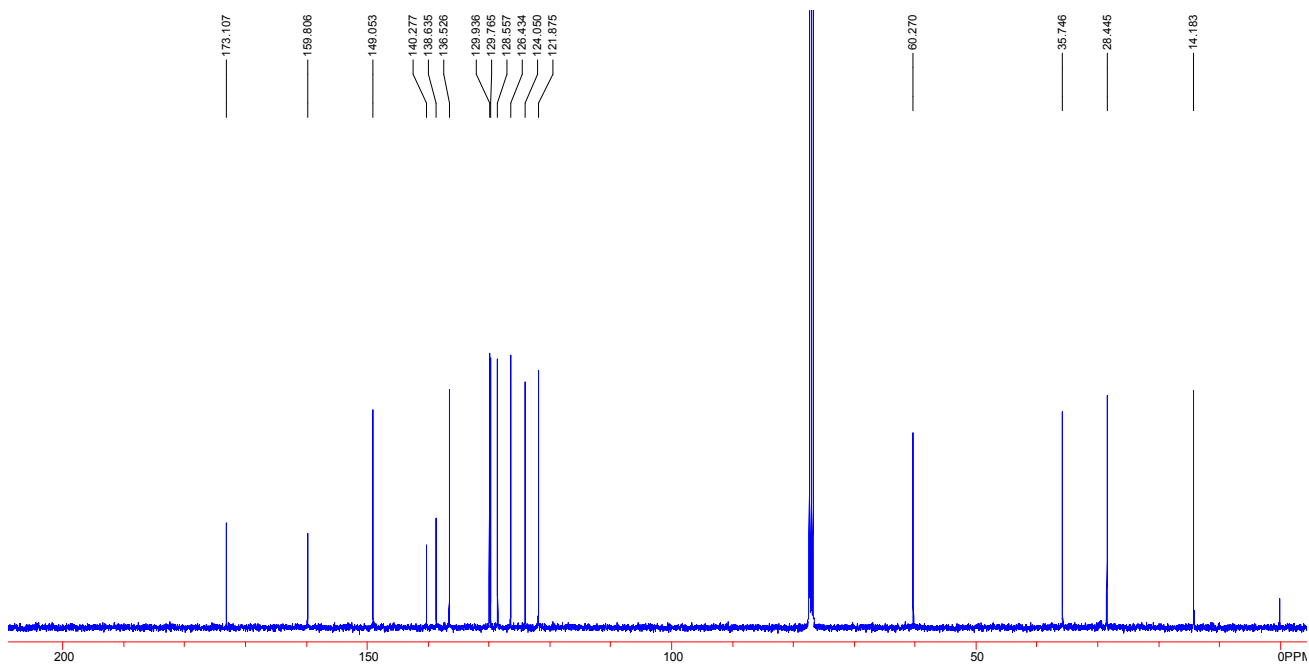

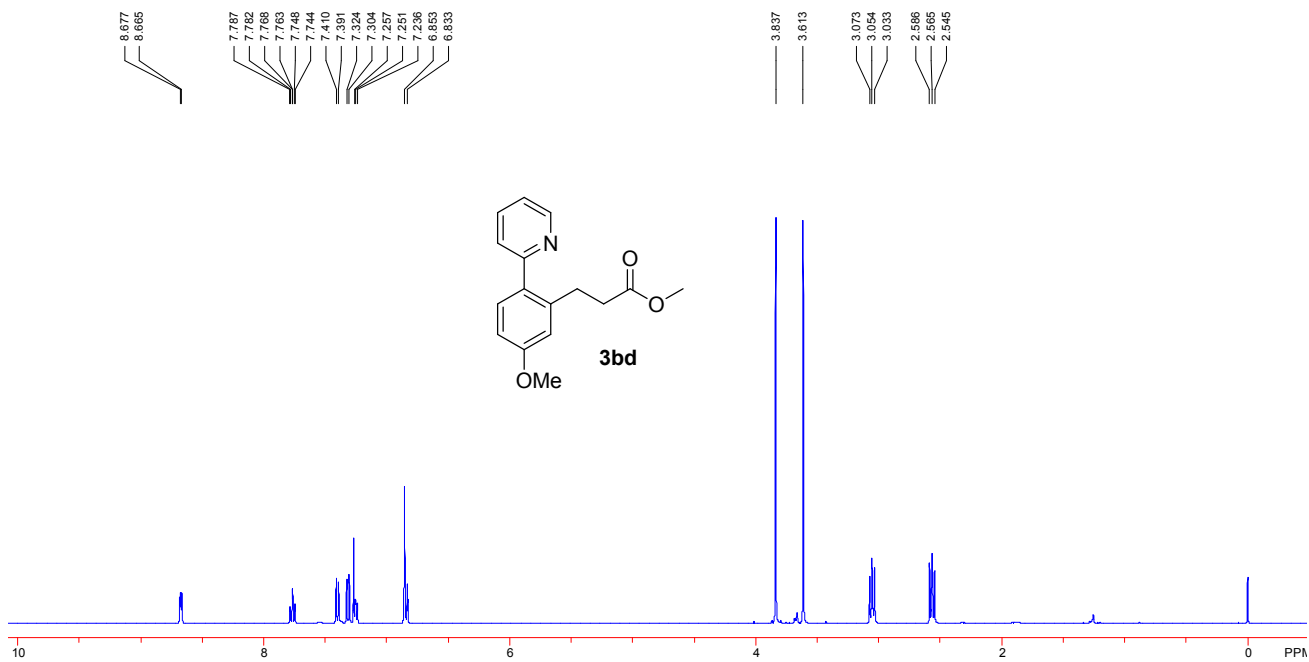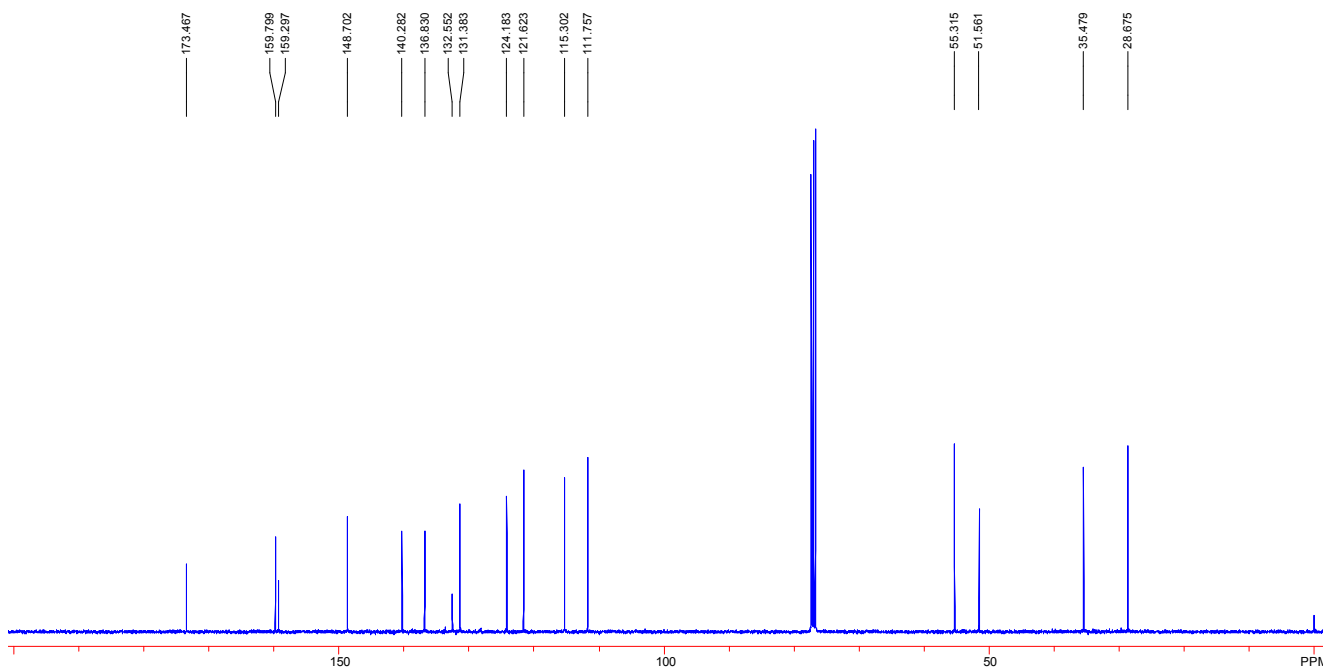



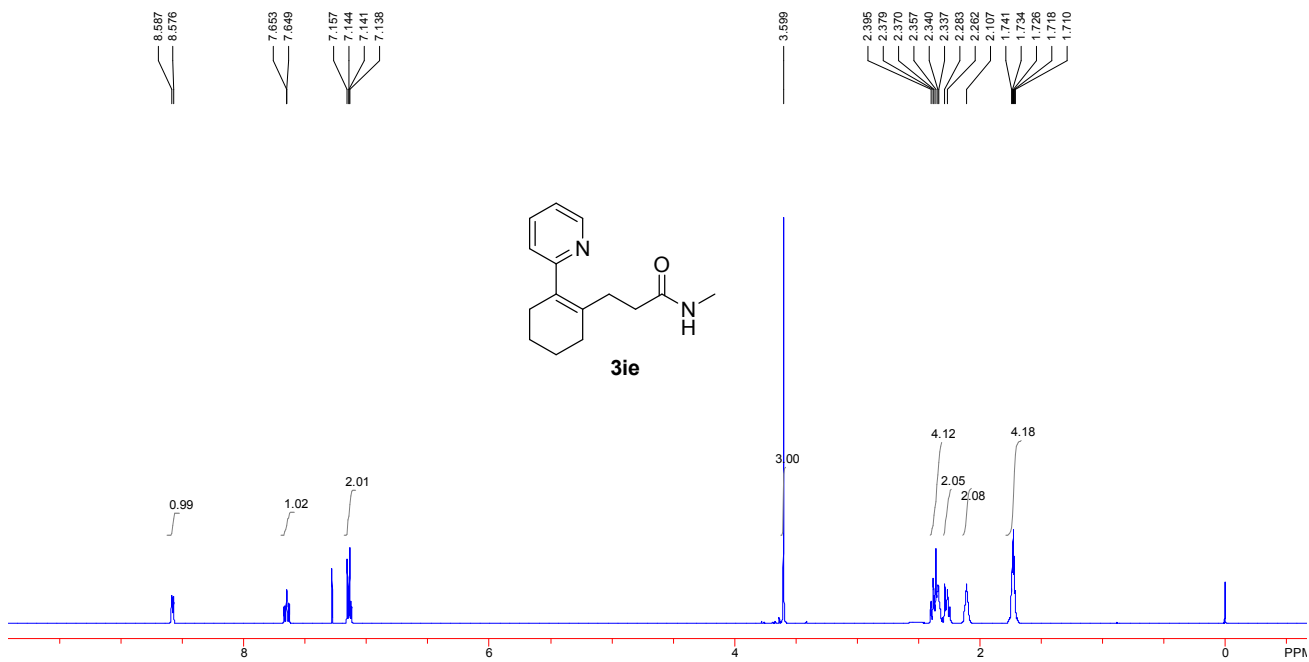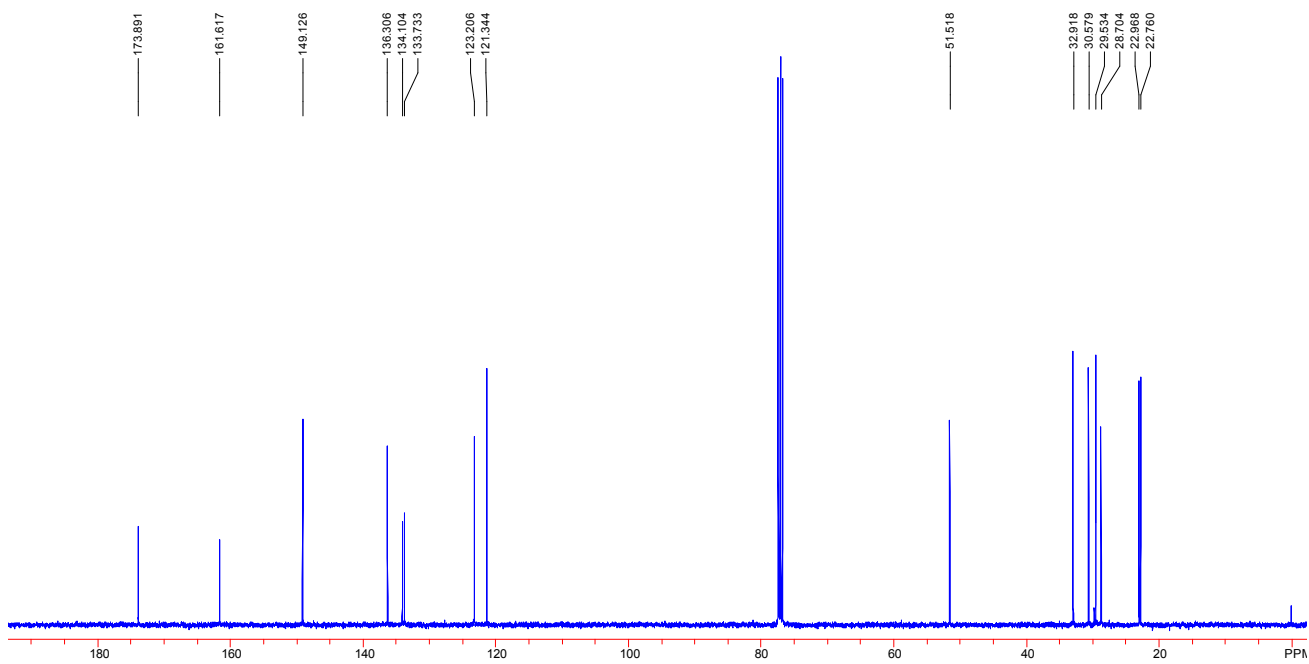

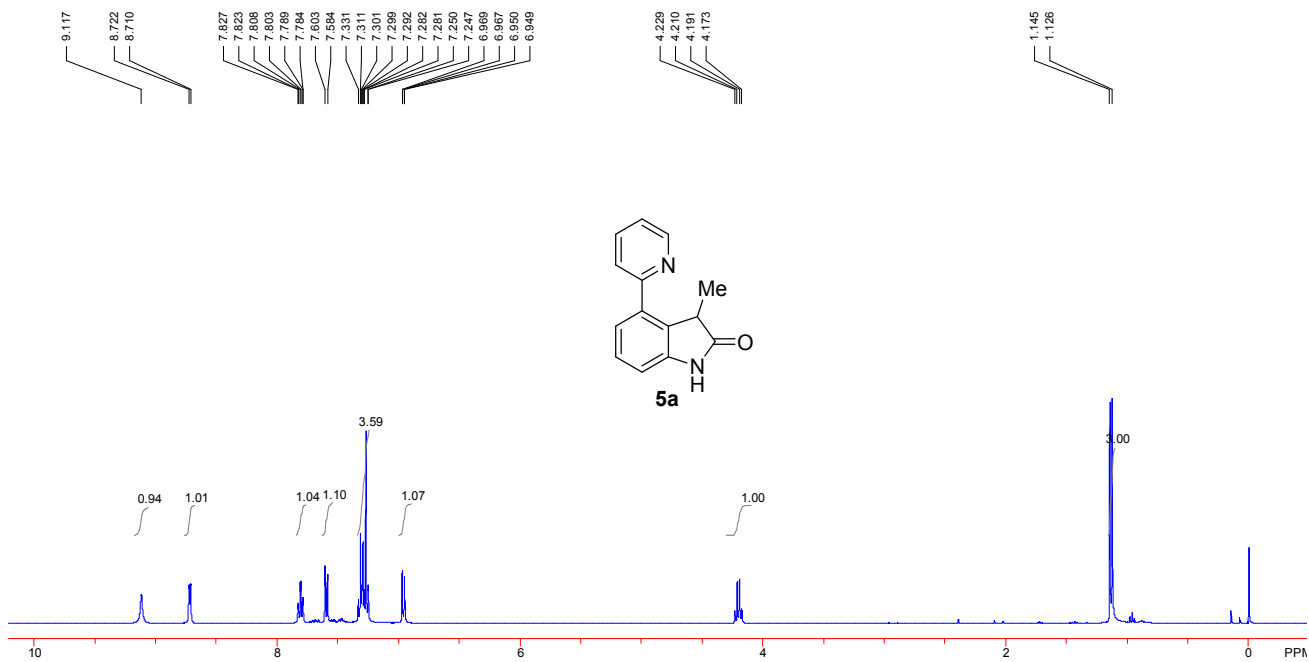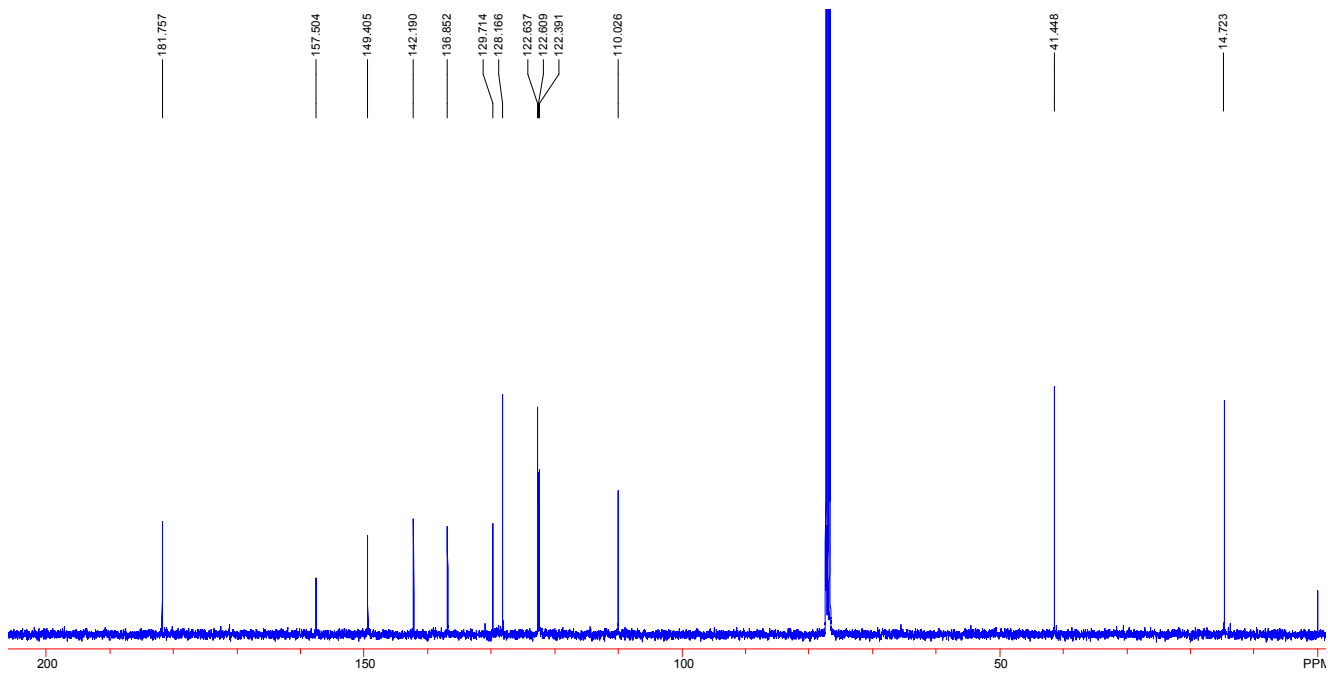

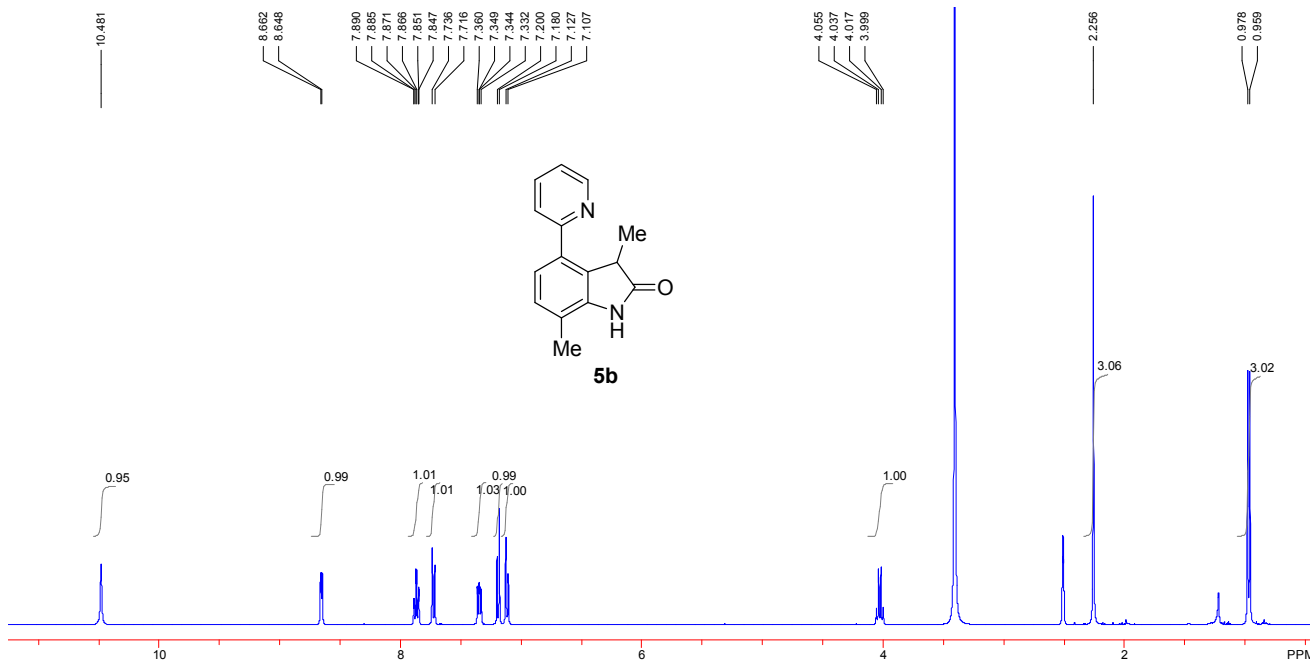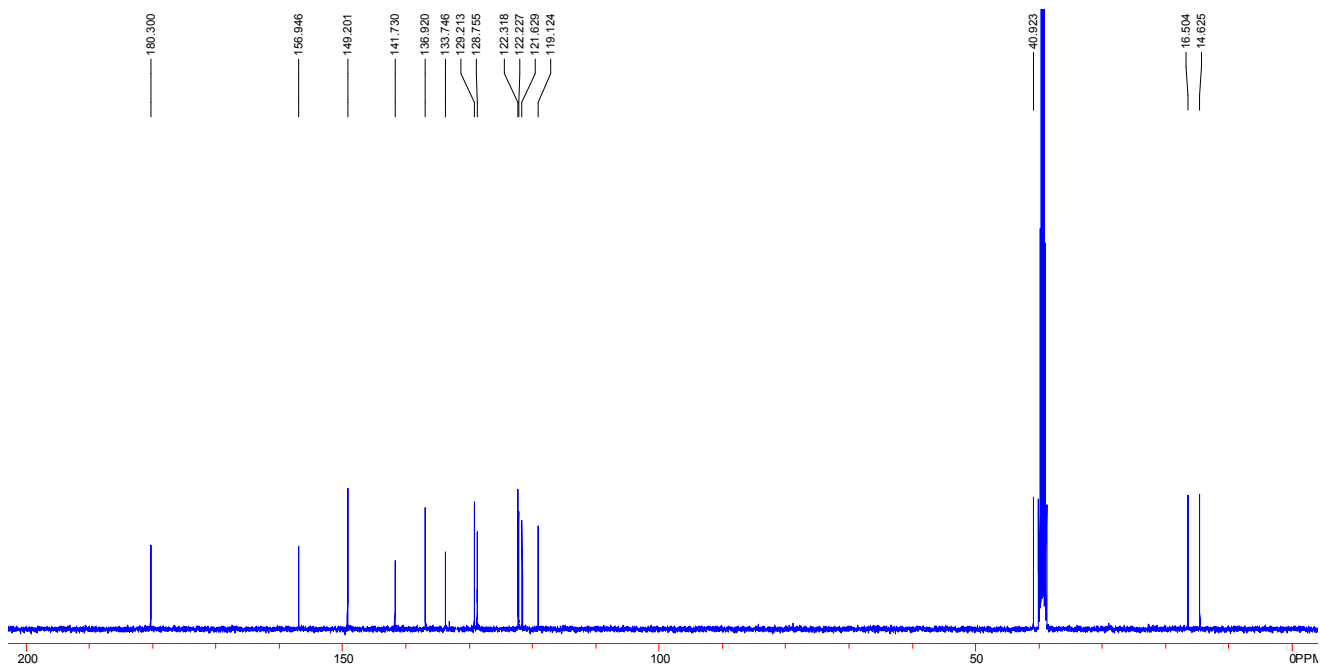

9.357

7.576  
7.576  
7.568  
7.556  
7.270  
7.250  
7.231  
7.047  
7.028

4.488  
4.468  
4.454  
4.445  
4.441  
4.430  
4.419  
4.408  
4.386  
4.377  
4.074  
4.071  
3.874  
3.855

1.541  
1.522

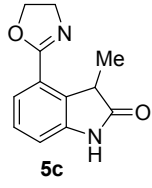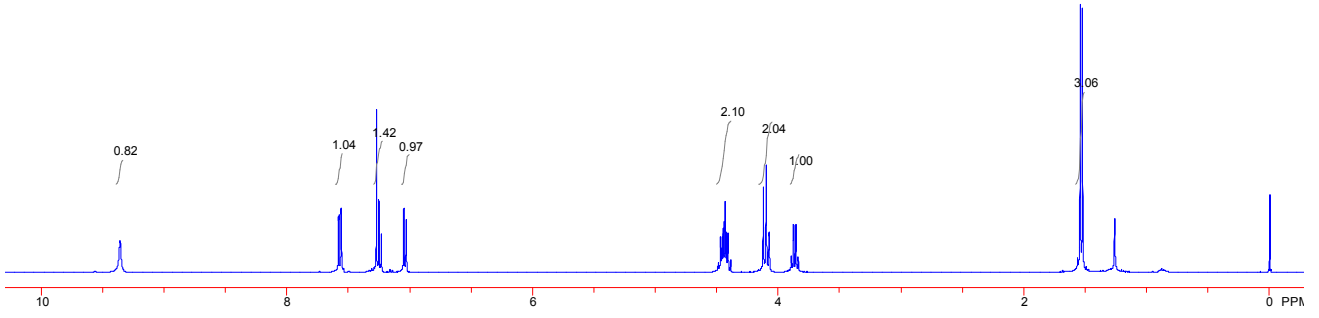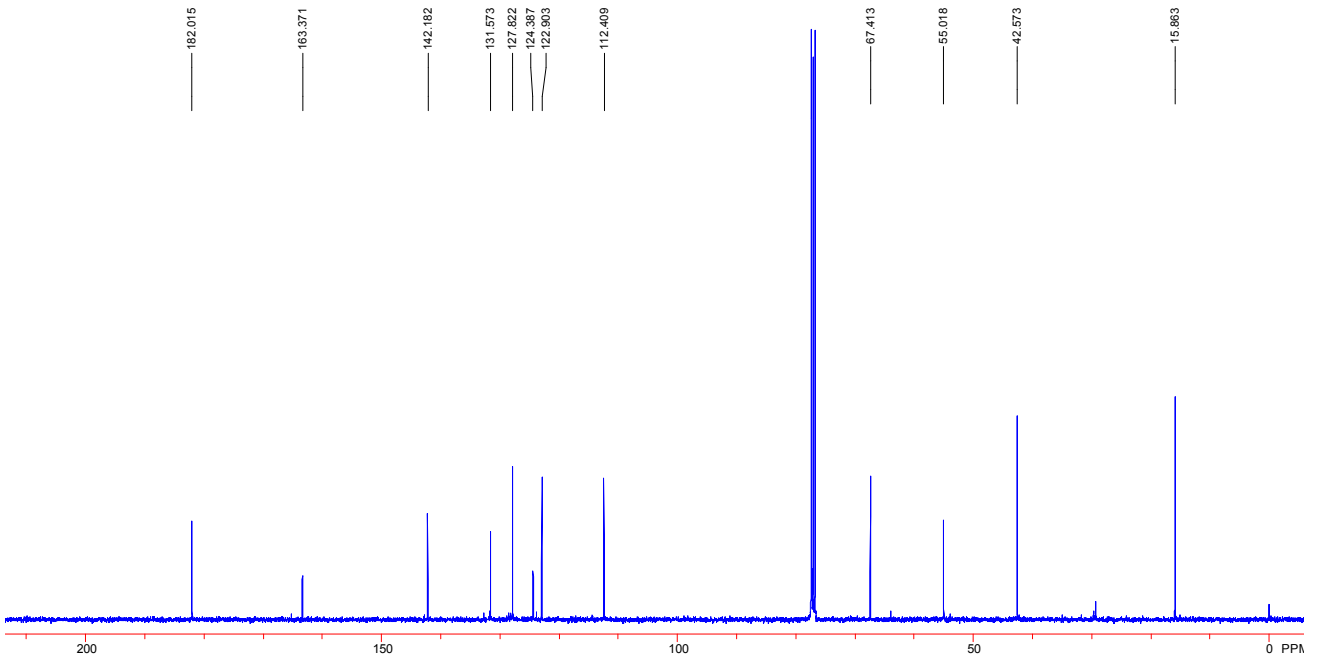

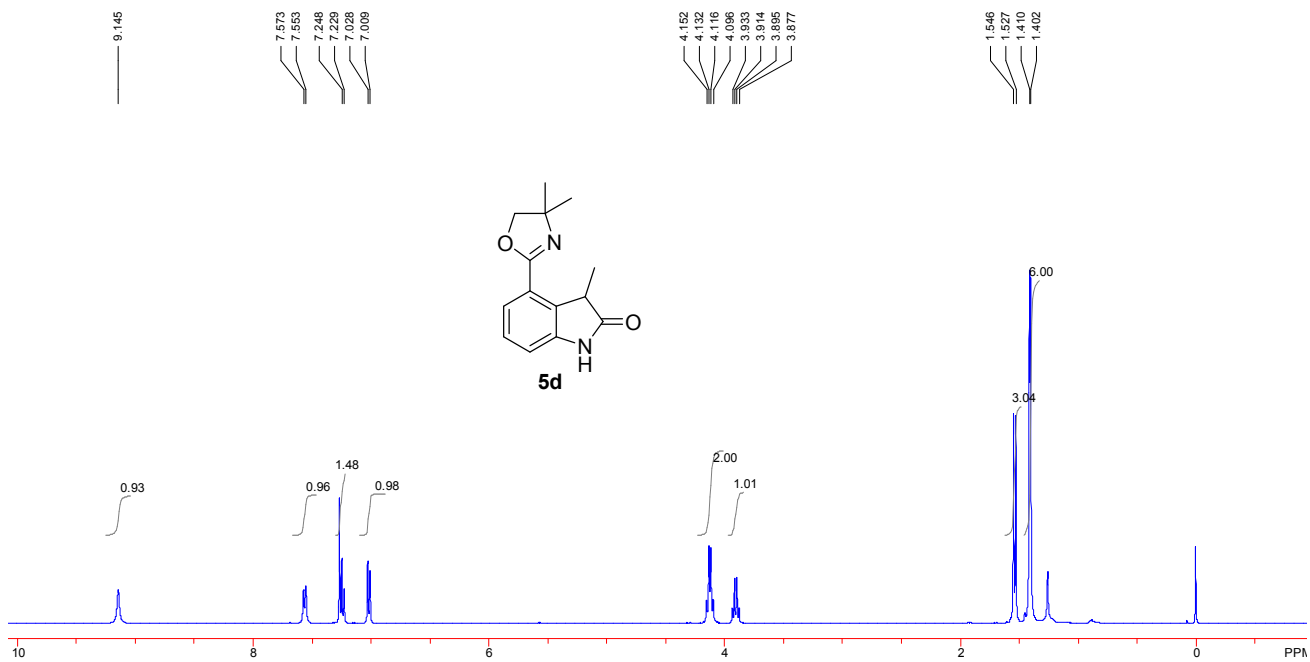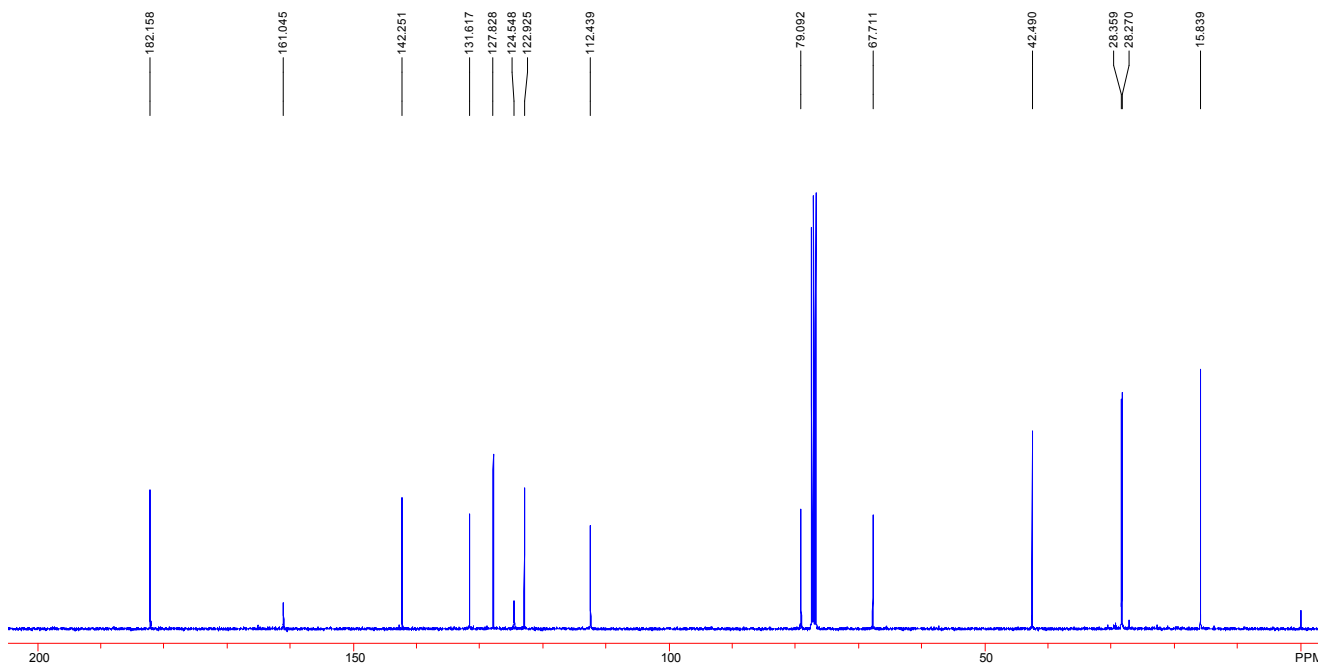

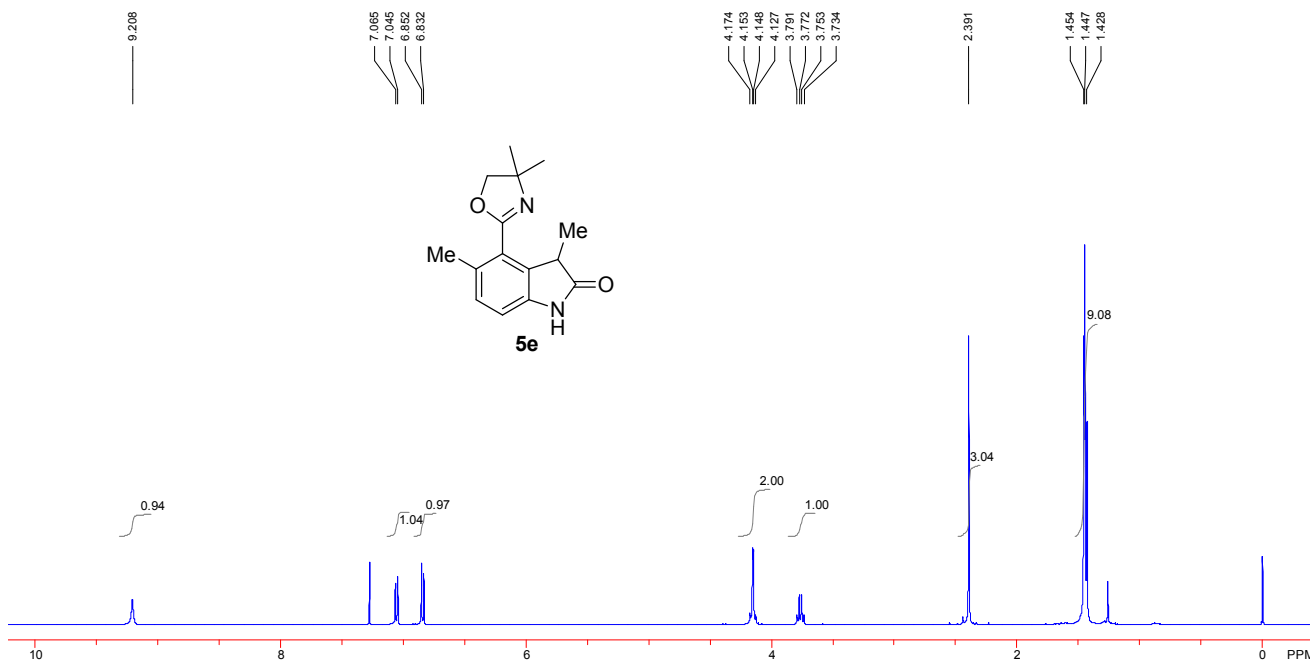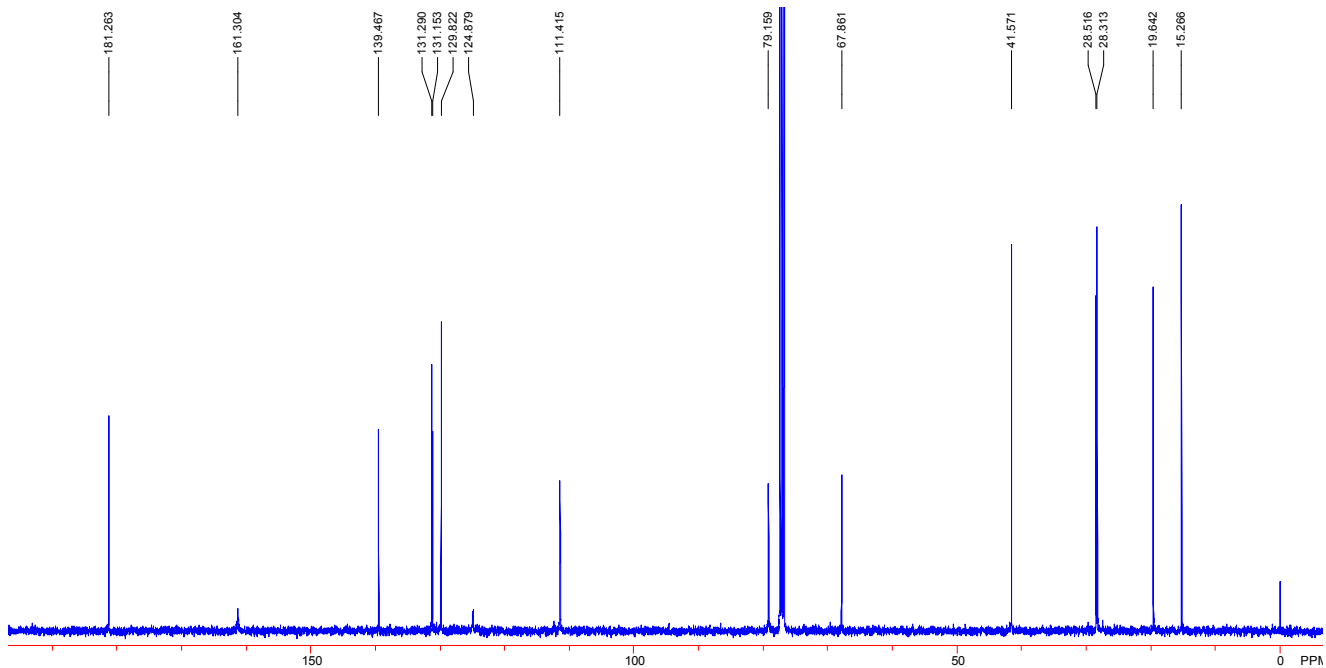

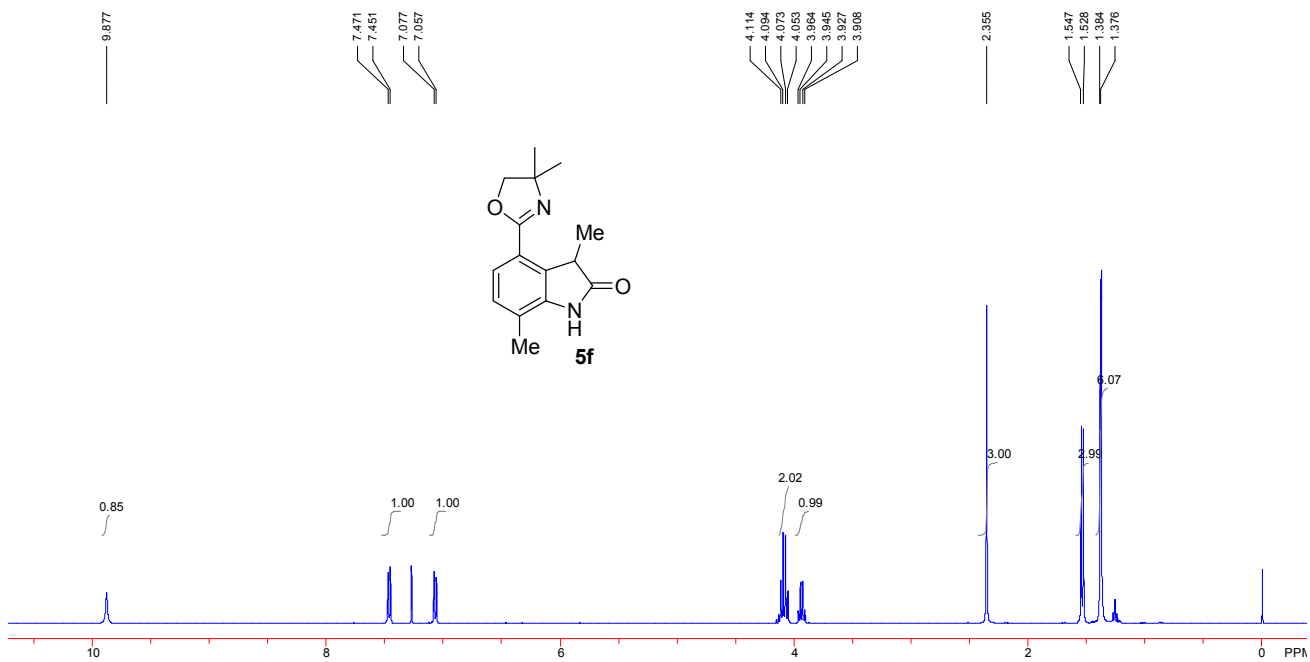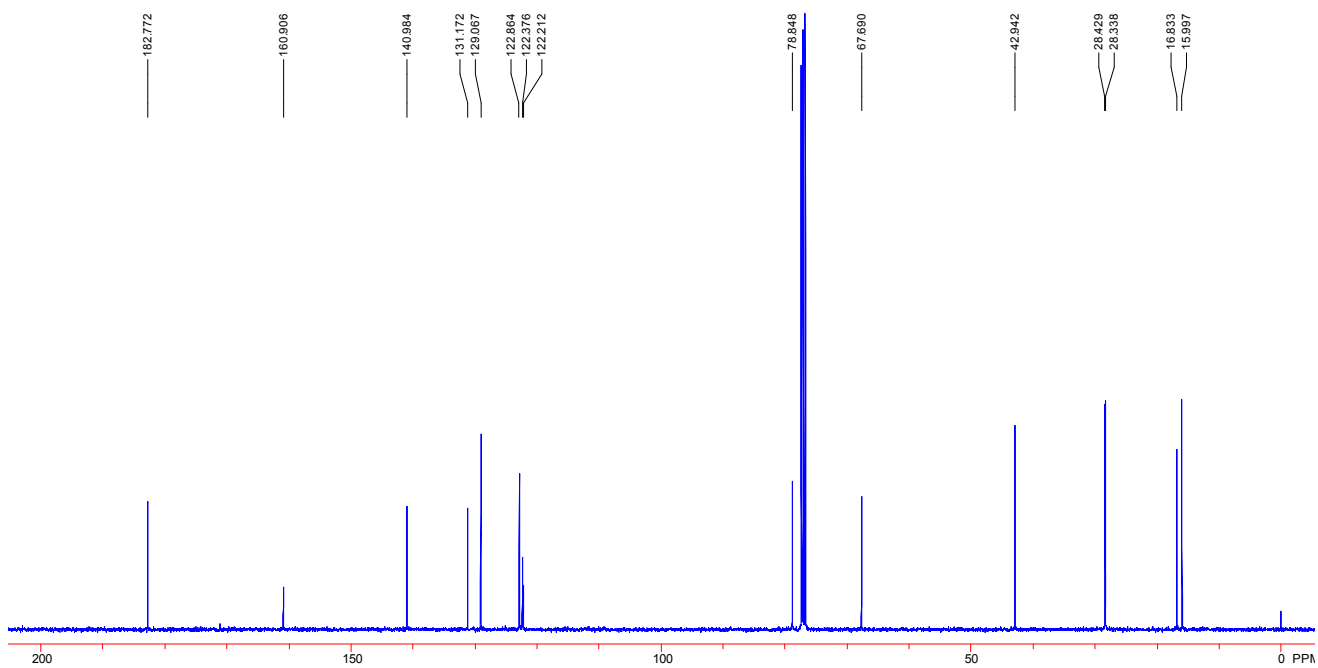

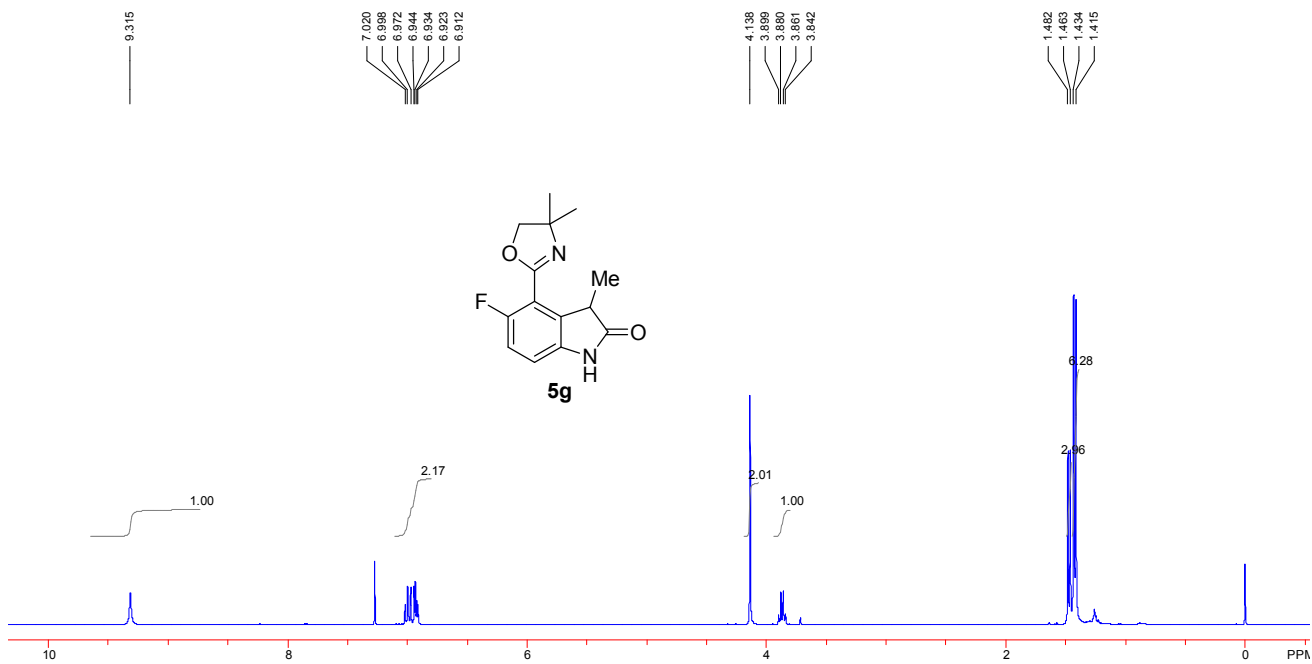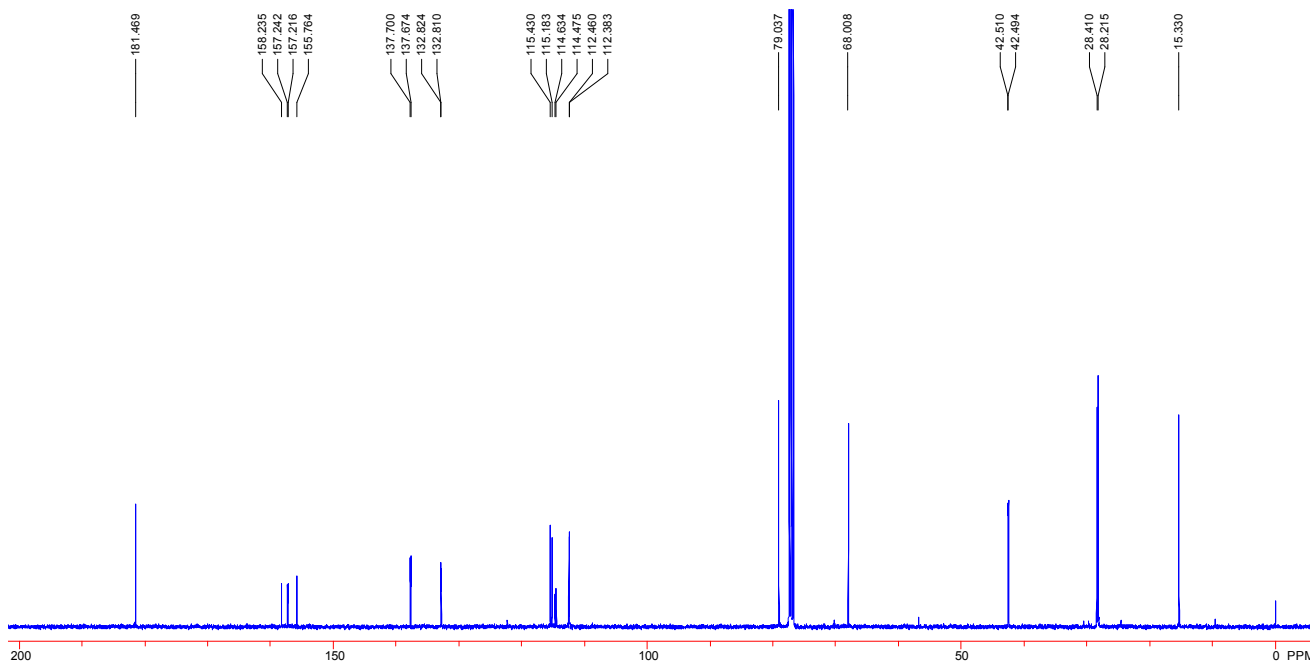



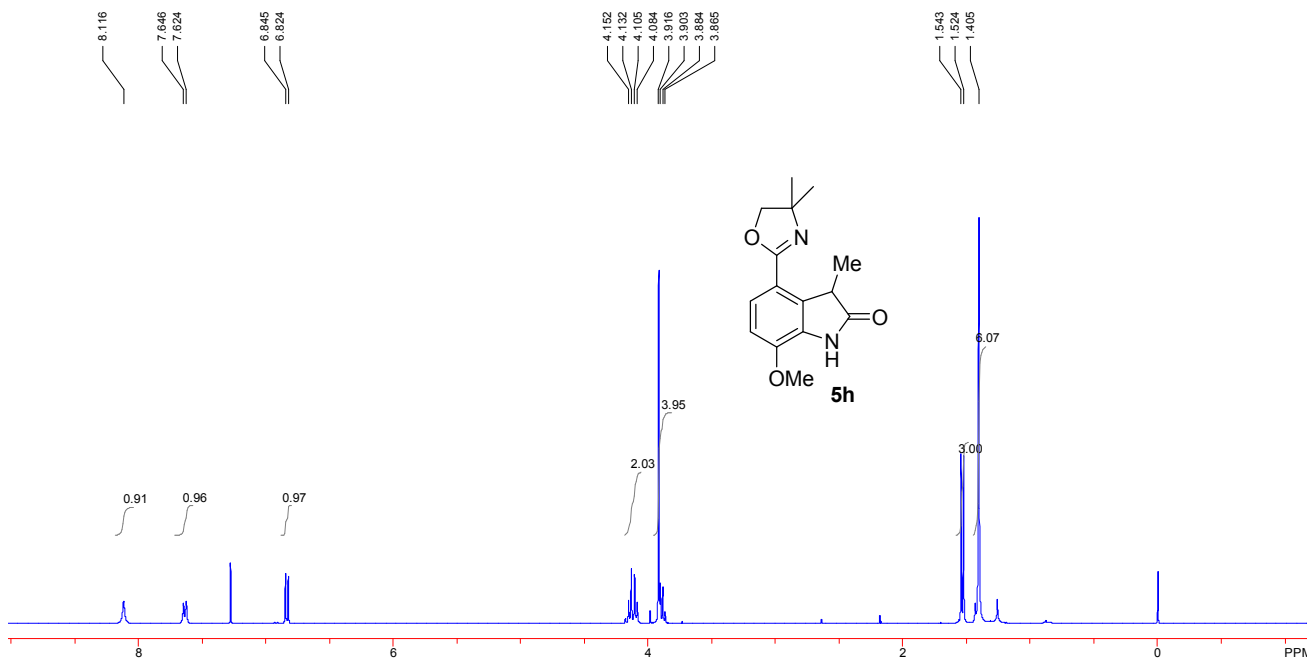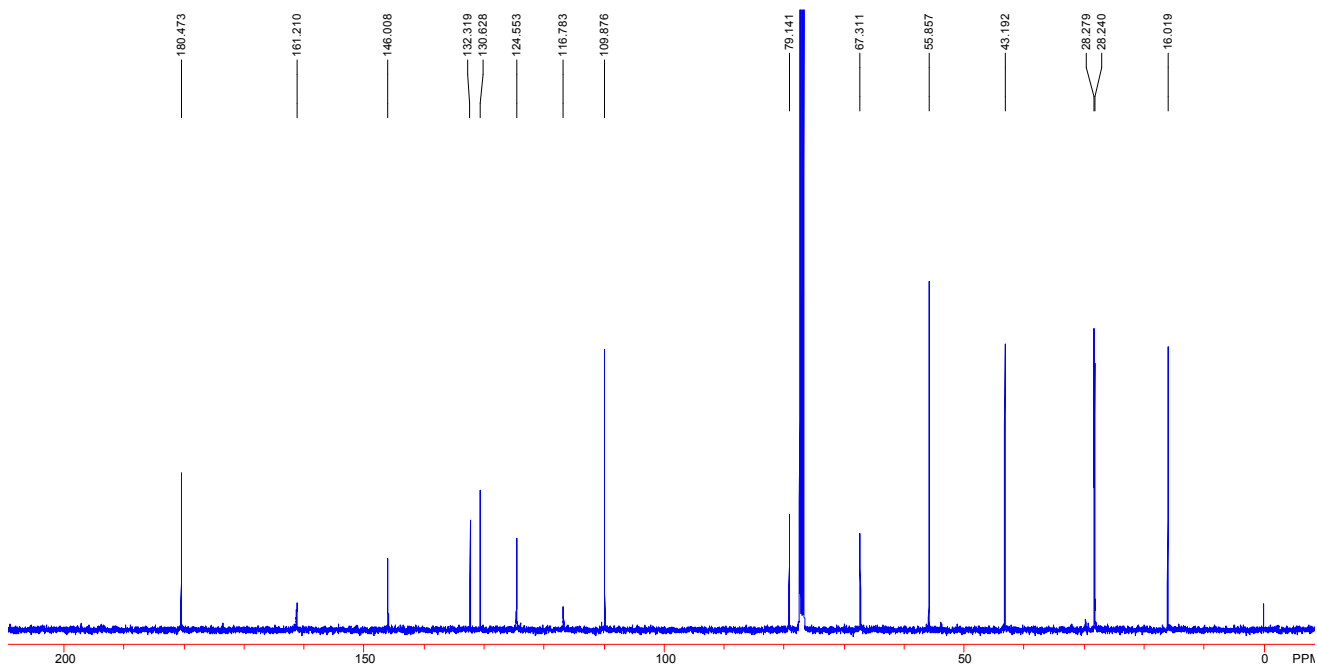

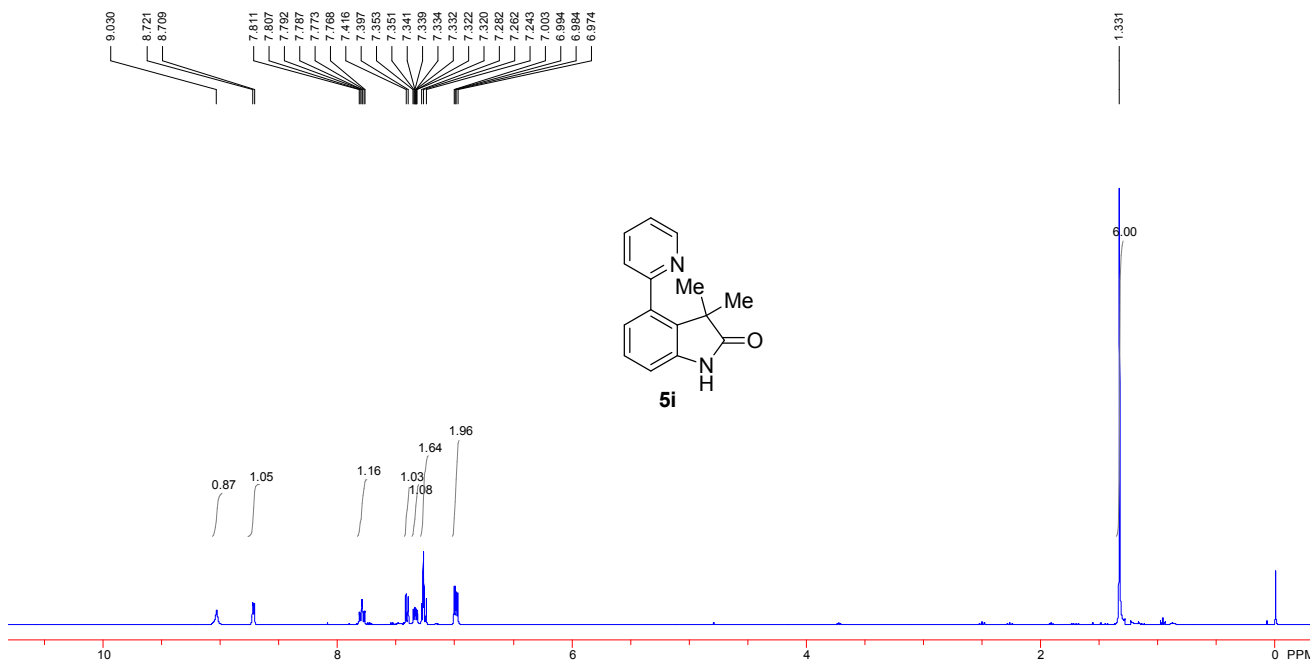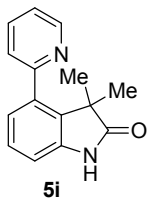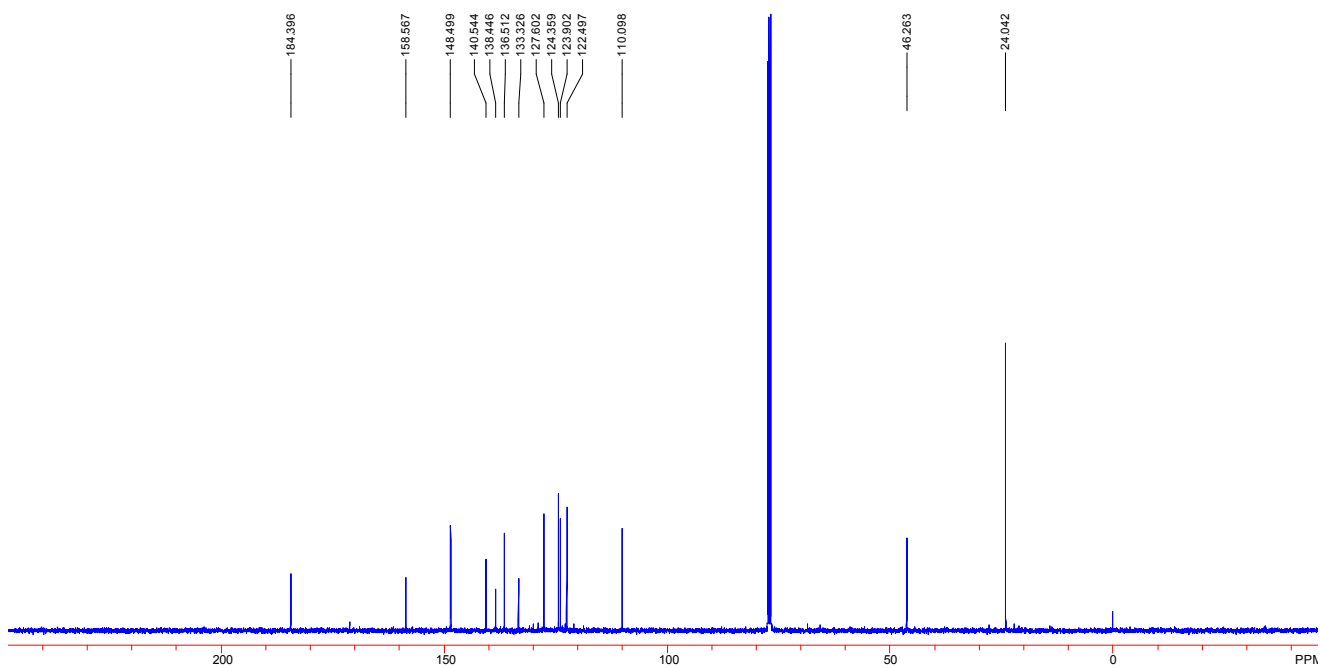

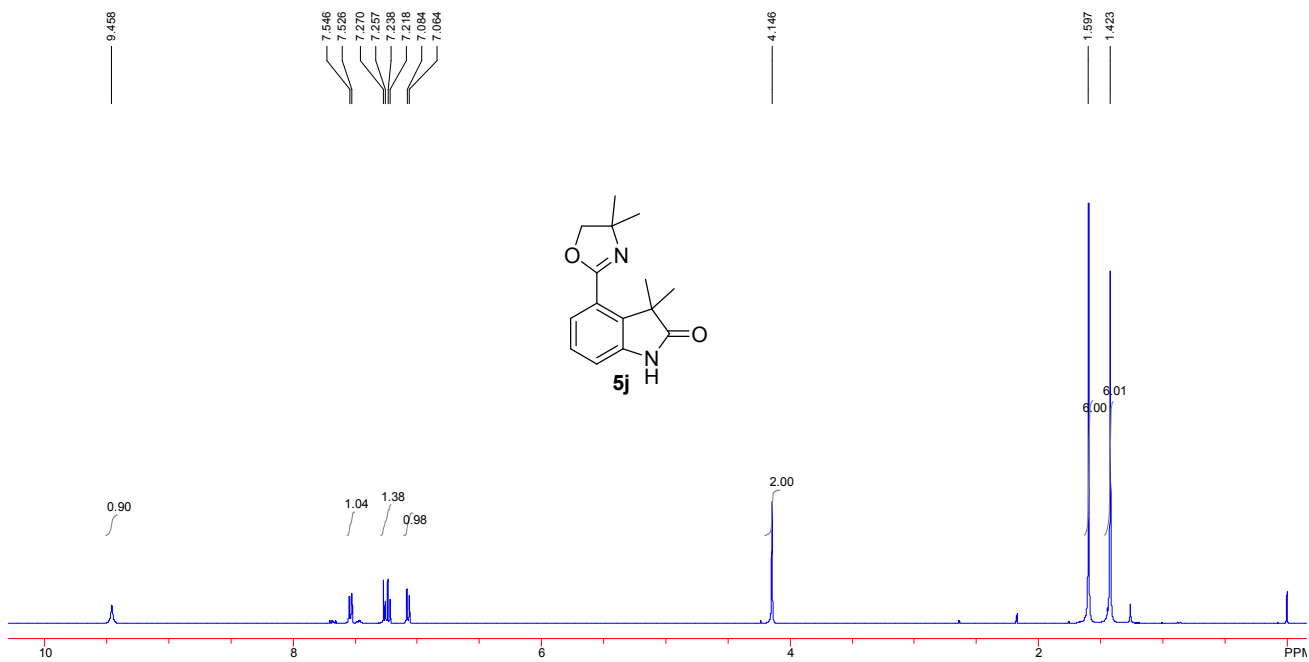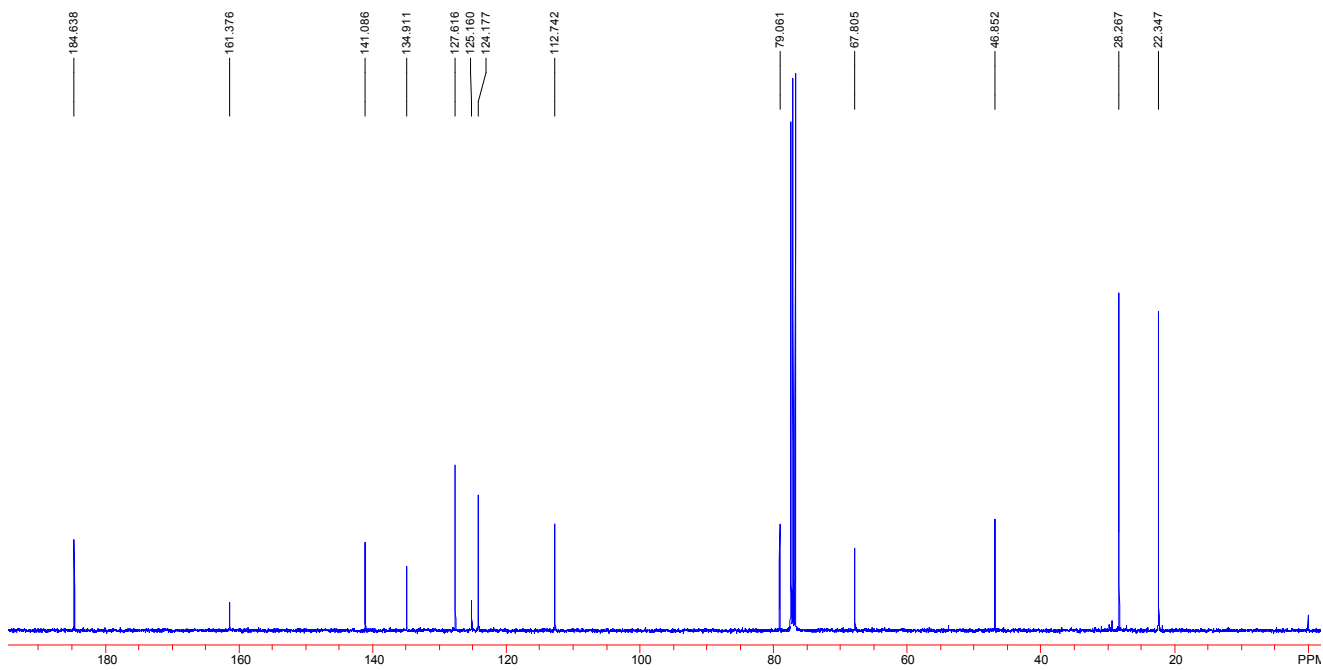

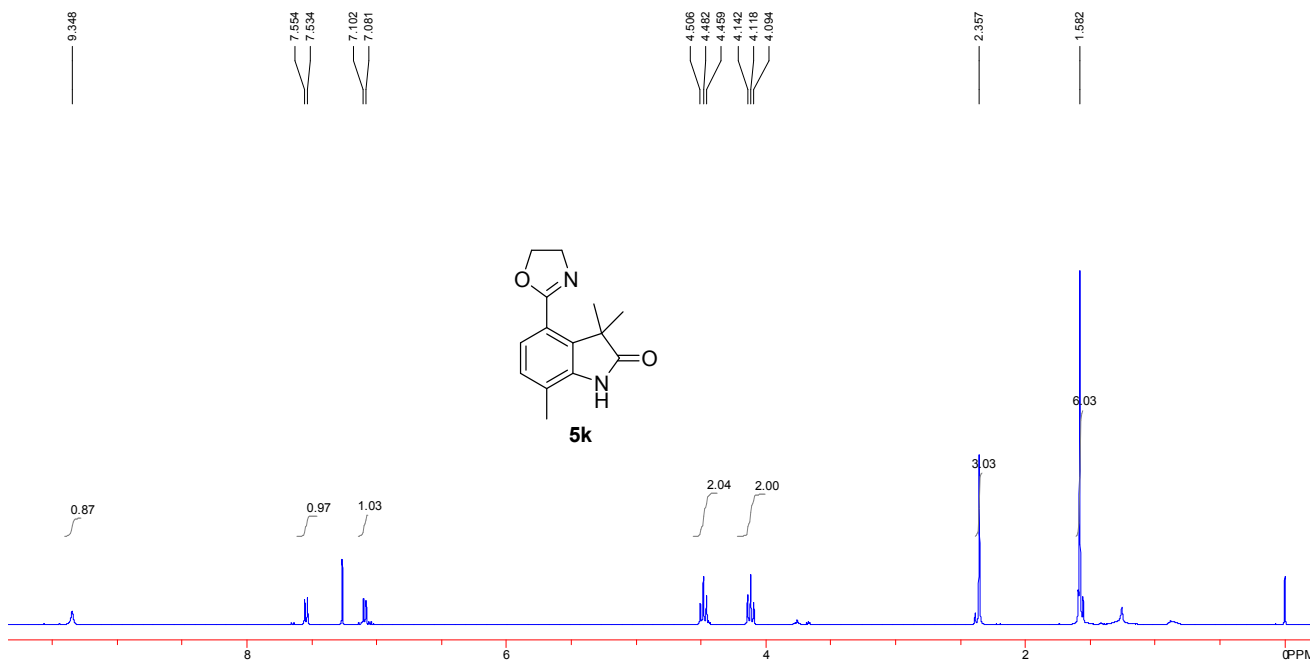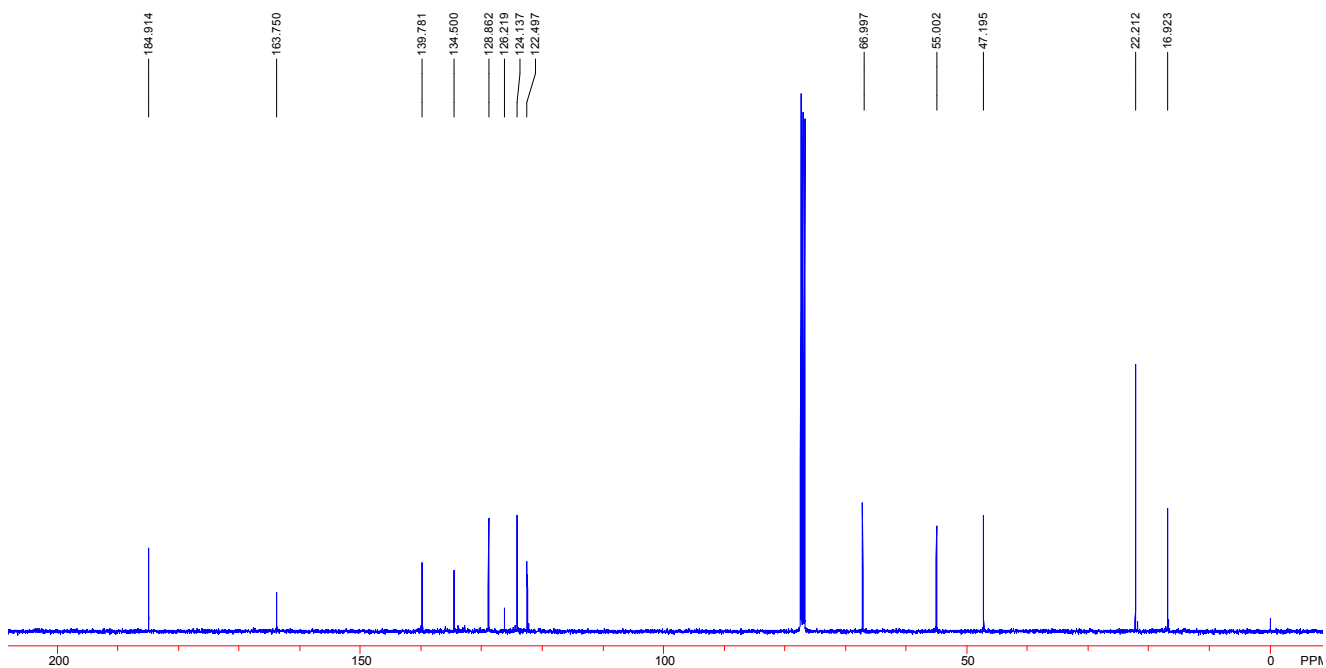

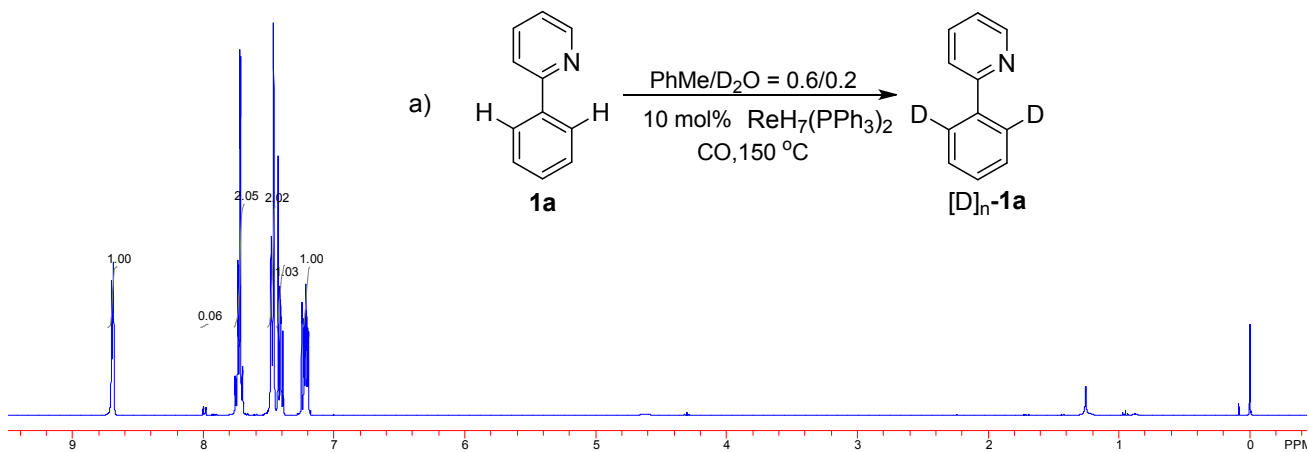

KIE experiment:

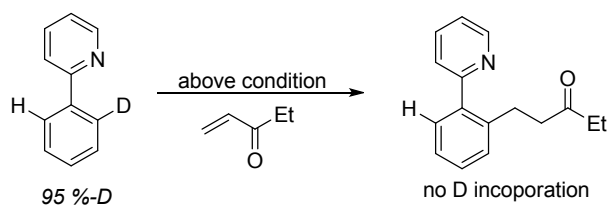

A large negative kinetic isotope effect

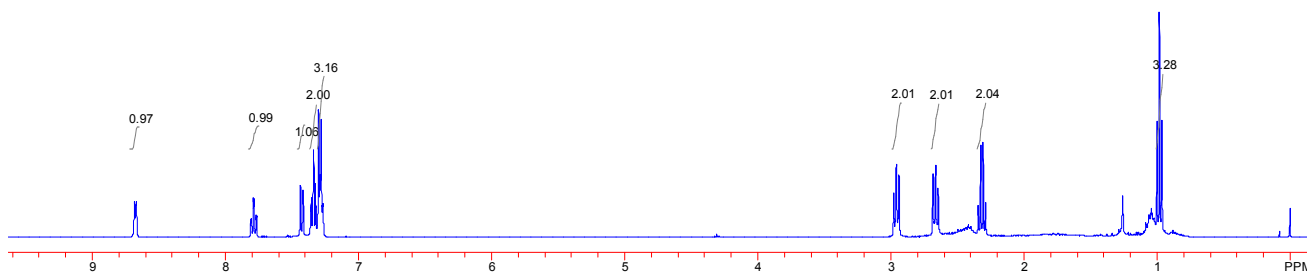

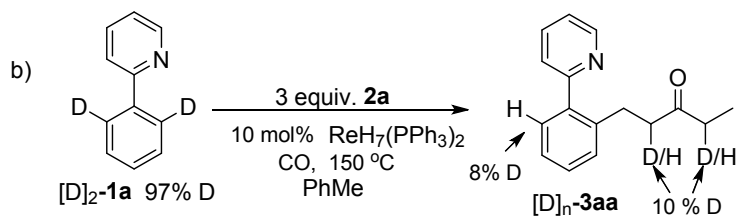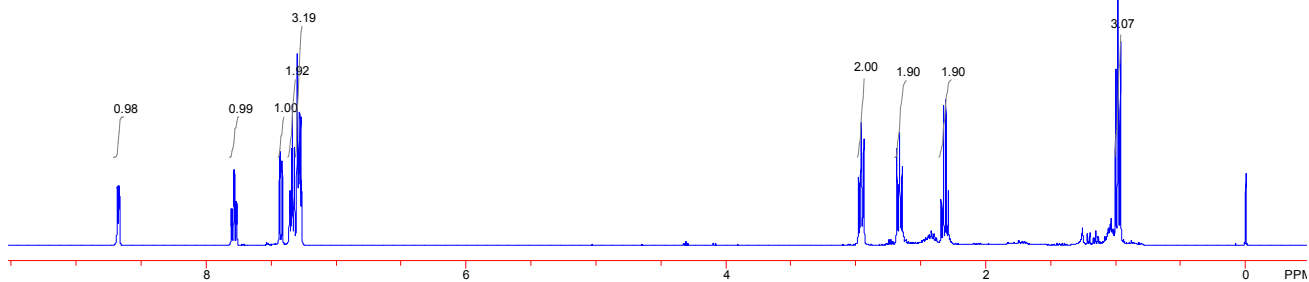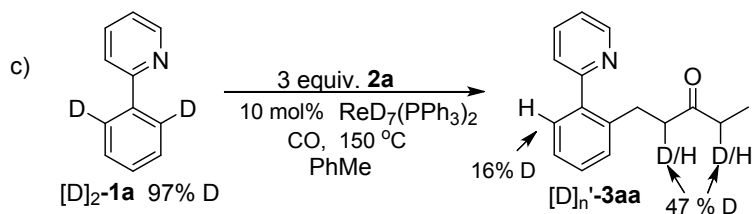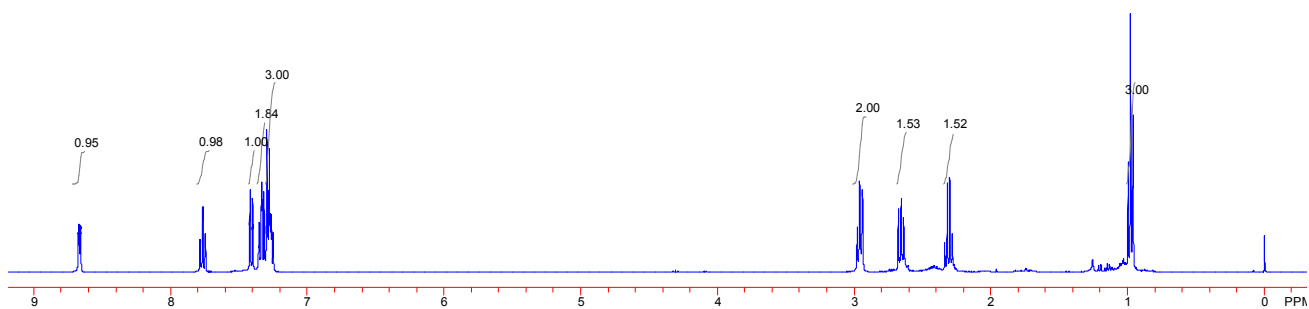

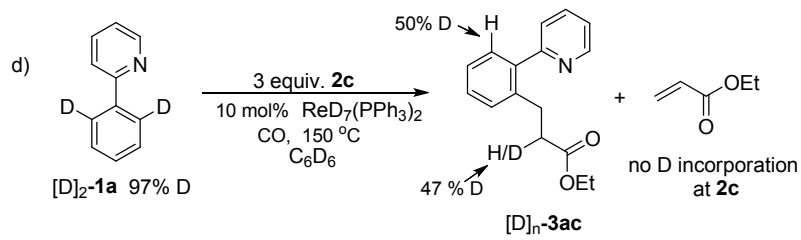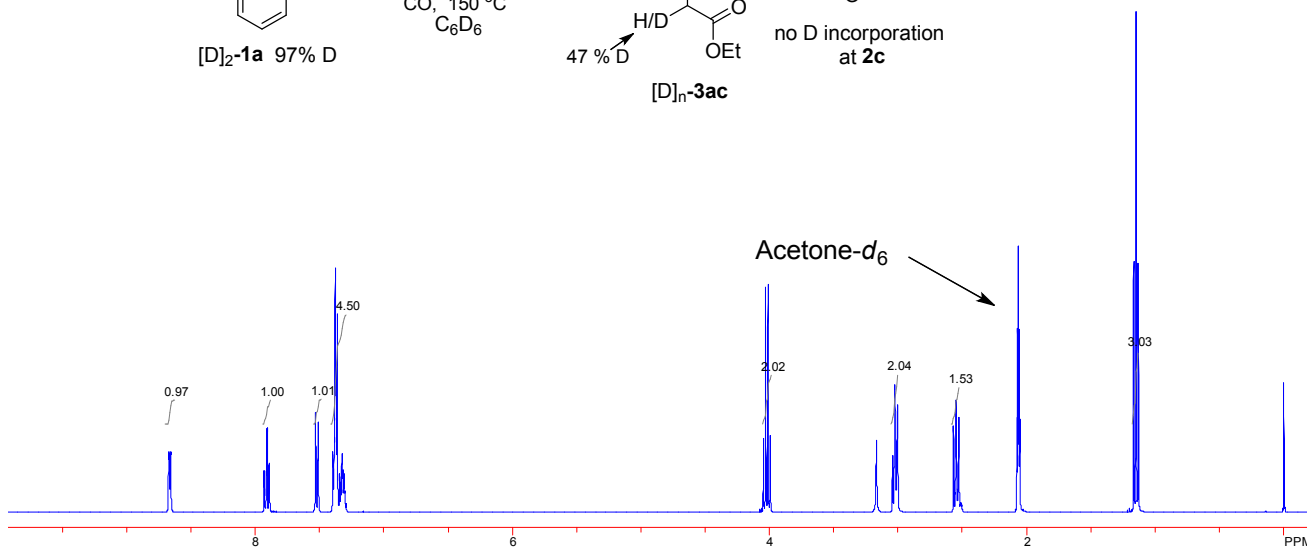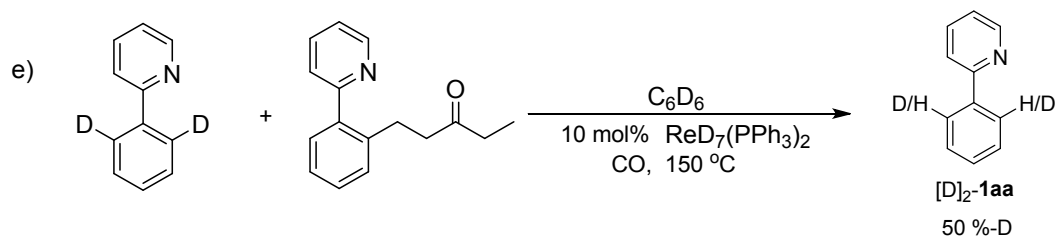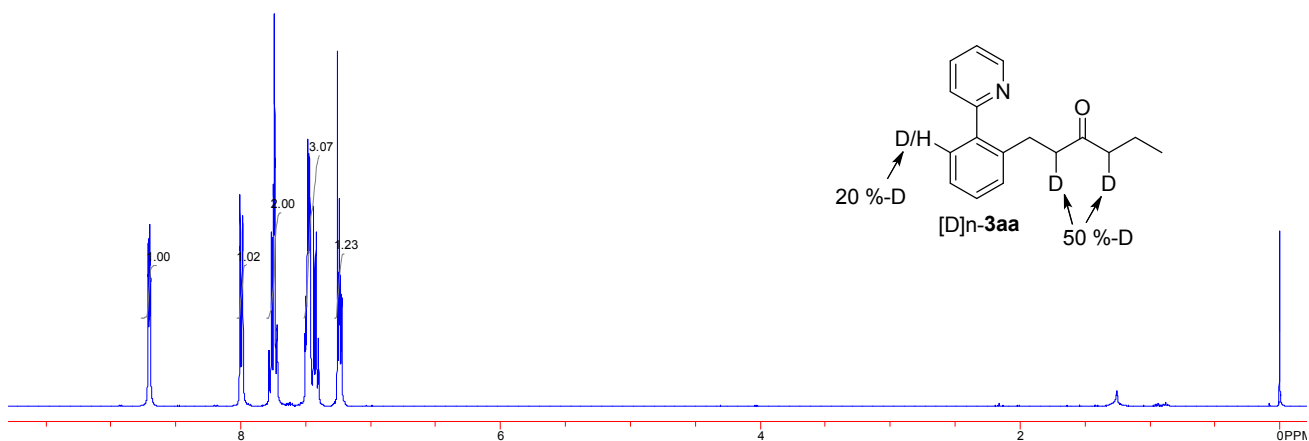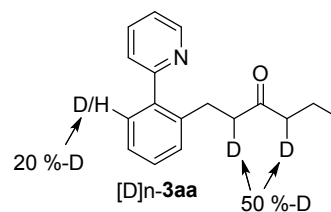

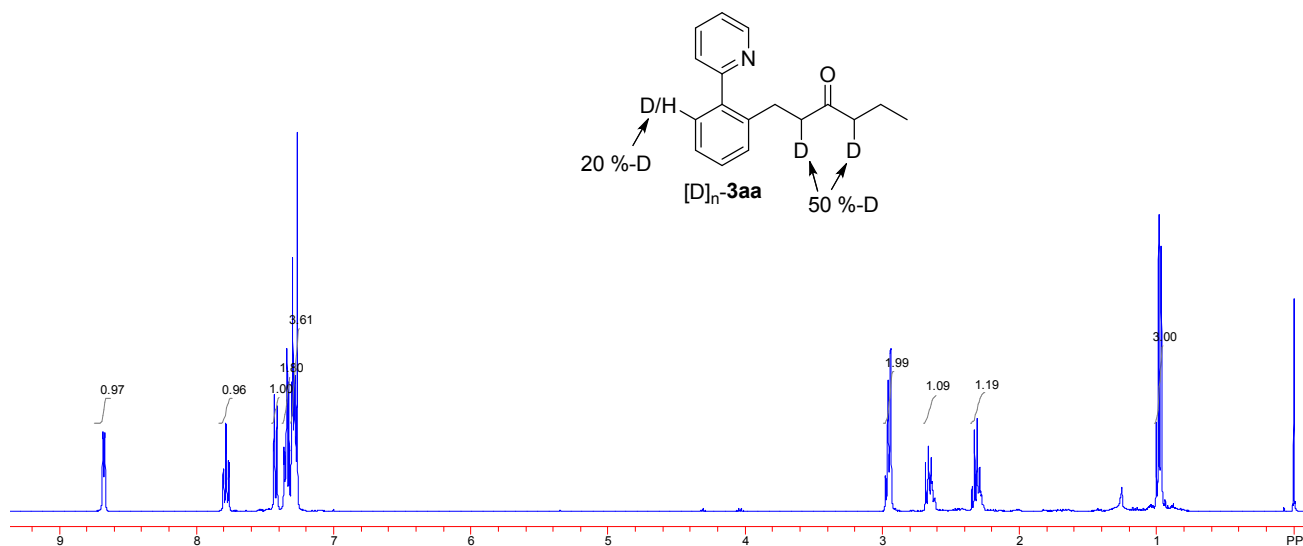

## References:

- [1] N. Salvatore, N. Morellato, A. Venzo, F. Refosco, A. Dolmella, C. Bolzati, *Inorg. Chem.* 2013, **52**, 6365.
- [2] V. Rauniyar, H. Zhai, D. G. Hall, *J. Am. Chem. Soc.* 2008, **130**, 8481.
- [3] I. Čerňa, R. Pohl, B. Klepetářová, M. Hocek, *J. Org. Chem.* 2008, **73**, 9048.
- [4] C. O. Kangani, D. E. Kelley, *Tetrahedron Lett.* 2005, **46**, 8917.
- [5] B. P. Bandgar, S. S. Pandit, *Tetrahedron Lett.* 2003, **44**, 2331.
- [6] A. J. Phillips, Y. Uto, P. Wipf, M. J. Reno, D. R. Williams, *Org. Lett.* 2000, **2**, 1165.
- [7] H. Takaya, M. Ito, S. Murahashi, *J. Am. Chem. Soc.* 2009, **131**, 10824.
- [8] Y. Kuninobu, Y. Nishina, K. Okaguchi, M. Shouho, K. Takai, *Bull. Chem. Soc. Jpn.* 2008, **81**, 1393.
